# Supplementary material
Source: publisher figshare collection journal article supplement (https://acs.figshare.com/ndownloader/files/7685017)
Supplement: Supplementary file 1 [file 7685017]

## Sheet: Sample 1
Row	User Flag	OK	Cmpd.	m/z meas.	Mr calc.	z	Δ m/z [ppm]	RMS90 [ppm]	Rt [min]	Scores	#Cmpds.	Site [%]	Rank	P	Sequence	Modifications	Type	Range	Accession	Protein
1		true	7415	741.6156	2962.4230	4	3.50	23.67	56.80	121.8 (M:121.8)	14		1	2	R.KTFPTVNPSTGEVICQVAEGDKEDVDK.A	Carbamidomethyl: 15	CID	52 - 78	ALDH2_HUMAN	Aldehyde dehydrogenase, mitochondrial OS=Homo sapiens GN=ALDH2 PE=1 SV=2
2		true	8751	1002.4855	3004.4335	3	0.34	18.02	64.42	81.1 (M:81.1)	9	98.81	1	2	R.KTFPTVNPSTGEVICQVAEGDKEDVDK.A	Carbamidomethyl: 15; Acetyl: 22	CID	52 - 78	ALDH2_HUMAN	Aldehyde dehydrogenase, mitochondrial OS=Homo sapiens GN=ALDH2 PE=1 SV=2
3		true	9019	1002.4873	3004.4335	3	2.17	29.71	65.91	60.5 (M:60.5)	1		1	2	R.KTFPTVNPSTGEVICQVAEGDKEDVDK.A	Carbamidomethyl: 15; Acetyl: 1	CID	52 - 78	ALDH2_HUMAN	Aldehyde dehydrogenase, mitochondrial OS=Homo sapiens GN=ALDH2 PE=1 SV=2
4		true	8728	1003.4897	3007.4524	3	-1.75	11.15	64.27	22.8 (M:22.8)	1	82.59	1	2	R.KTFPTVNPSTGEVICQVAEGDKEDVDK.A	Carbamidomethyl: 15; Acetyl:2H(3): 22	CID	52 - 78	ALDH2_HUMAN	Aldehyde dehydrogenase, mitochondrial OS=Homo sapiens GN=ALDH2 PE=1 SV=2
5		true	10401	1018.5018	3052.4818	3	0.59	13.99	73.94	67.5 (M:67.5)	4	99.81	1	2	R.KTFPTVNPSTGEVICQVAEGDKEDVDK.A	Carbamidomethyl: 15; Acetyl:2H(3): 1, 22	CID	52 - 78	ALDH2_HUMAN	Aldehyde dehydrogenase, mitochondrial OS=Homo sapiens GN=ALDH2 PE=1 SV=2
6		true	7695	653.1348	3260.6235	5	4.29	18.14	58.47	82.2 (M:82.2)	4		1	3	R.KTFPTVNPSTGEVICQVAEGDKEDVDKAVK.A	Carbamidomethyl: 15	CID	52 - 81	ALDH2_HUMAN	Aldehyde dehydrogenase, mitochondrial OS=Homo sapiens GN=ALDH2 PE=1 SV=2
8		true	10010	671.1468	3350.6823	5	4.52	17.93	71.79	30.4 (M:30.4)	1	44.44	1	3	R.KTFPTVNPSTGEVICQVAEGDKEDVDKAVK.A	Carbamidomethyl: 15; Acetyl:2H(3): 22, 30	CID	52 - 81	ALDH2_HUMAN	Aldehyde dehydrogenase, mitochondrial OS=Homo sapiens GN=ALDH2 PE=1 SV=2
9		true	8381	826.6676	3302.6340	4	2.21	12.23	62.27	81.0 (M:81.0)	12	80.07	1	3	R.KTFPTVNPSTGEVICQVAEGDKEDVDKAVK.A	Carbamidomethyl: 15; Acetyl: 30	CID	52 - 81	ALDH2_HUMAN	Aldehyde dehydrogenase, mitochondrial OS=Homo sapiens GN=ALDH2 PE=1 SV=2
11		true	9797	837.9212	3347.6634	4	-2.34	19.36	70.49	32.1 (M:32.1)	2	72.04	1	3	R.KTFPTVNPSTGEVICQVAEGDKEDVDKAVK.A	Carbamidomethyl: 15; Acetyl: 27; Acetyl:2H(3): 1	CID	52 - 81	ALDH2_HUMAN	Aldehyde dehydrogenase, mitochondrial OS=Homo sapiens GN=ALDH2 PE=1 SV=2
12		true	9769	838.6788	3350.6823	4	1.08	43.85	70.33	41.6 (M:41.6)	3	33.33	1	3	R.KTFPTVNPSTGEVICQVAEGDKEDVDKAVK.A	Carbamidomethyl: 15; Acetyl:2H(3): 1, 22	CID	52 - 81	ALDH2_HUMAN	Aldehyde dehydrogenase, mitochondrial OS=Homo sapiens GN=ALDH2 PE=1 SV=2
13		true	11567	849.9383	3395.7117	4	3.69	8.21	80.72	36.6 (M:36.6)	6	87.50	1	3	R.KTFPTVNPSTGEVICQVAEGDKEDVDKAVK.A	Carbamidomethyl: 15; Acetyl:2H(3): 1, 22, 27	CID	52 - 81	ALDH2_HUMAN	Aldehyde dehydrogenase, mitochondrial OS=Homo sapiens GN=ALDH2 PE=1 SV=2
15		true	10036	1115.8896	3344.6446	3	0.71	12.92	71.90	65.4 (M:65.4)	13	91.76	1	3	R.KTFPTVNPSTGEVICQVAEGDKEDVDKAVK.A	Carbamidomethyl: 15; Acetyl: 22, 27	CID	52 - 81	ALDH2_HUMAN	Aldehyde dehydrogenase, mitochondrial OS=Homo sapiens GN=ALDH2 PE=1 SV=2
16		true	10027	1116.8945	3347.6634	3	-0.56	60.50	71.85	49.1 (M:49.1)	2	30.32	1	3	R.KTFPTVNPSTGEVICQVAEGDKEDVDKAVK.A	Carbamidomethyl: 15; Acetyl: 27; Acetyl:2H(3): 22	CID	52 - 81	ALDH2_HUMAN	Aldehyde dehydrogenase, mitochondrial OS=Homo sapiens GN=ALDH2 PE=1 SV=2
17		true	11589	1129.8929	3386.6552	3	0.50	54.16	80.83	53.8 (M:53.8)	2	78.32	1	3	R.KTFPTVNPSTGEVICQVAEGDKEDVDKAVK.A	Carbamidomethyl: 15; Acetyl: 1, 22, 27	CID	52 - 81	ALDH2_HUMAN	Aldehyde dehydrogenase, mitochondrial OS=Homo sapiens GN=ALDH2 PE=1 SV=2
19		true	8731	945.7848	2834.3280	3	1.61	13.94	64.28	129.7 (M:129.7)	7		1	1	K.TFPTVNPSTGEVICQVAEGDKEDVDK.A	Carbamidomethyl: 14	CID	53 - 78	ALDH2_HUMAN	Aldehyde dehydrogenase, mitochondrial OS=Homo sapiens GN=ALDH2 PE=1 SV=2
20		true	10184	959.7882	2876.3386	3	1.41	8.30	72.72	85.4 (M:85.4)	4	99.83	1	1	K.TFPTVNPSTGEVICQVAEGDKEDVDK.A	Carbamidomethyl: 14; Acetyl: 21	CID	53 - 78	ALDH2_HUMAN	Aldehyde dehydrogenase, mitochondrial OS=Homo sapiens GN=ALDH2 PE=1 SV=2
21		true	10168	960.7959	2879.3574	3	2.94	117.22	72.62	33.5 (M:33.5)	1	93.60	1	1	K.TFPTVNPSTGEVICQVAEGDKEDVDK.A	Carbamidomethyl: 14; Acetyl:2H(3): 21	CID	53 - 78	ALDH2_HUMAN	Aldehyde dehydrogenase, mitochondrial OS=Homo sapiens GN=ALDH2 PE=1 SV=2
22		true	8809	784.1405	3132.5285	4	1.33	8.59	64.73	87.1 (M:87.1)	6		1	2	K.TFPTVNPSTGEVICQVAEGDKEDVDKAVK.A	Carbamidomethyl: 14	CID	53 - 81	ALDH2_HUMAN	Aldehyde dehydrogenase, mitochondrial OS=Homo sapiens GN=ALDH2 PE=1 SV=2
23		true	11455	805.1469	3216.5496	4	2.72	75.49	80.04	56.5 (M:56.5)	3	91.21	1	2	K.TFPTVNPSTGEVICQVAEGDKEDVDKAVK.A	Carbamidomethyl: 14; Acetyl: 21, 26	CID	53 - 81	ALDH2_HUMAN	Aldehyde dehydrogenase, mitochondrial OS=Homo sapiens GN=ALDH2 PE=1 SV=2
24		true	11472	805.8996	3219.5685	4	0.24	20.19	80.10	20.3 (M:20.3)	2	69.03	1	2	K.TFPTVNPSTGEVICQVAEGDKEDVDKAVK.A	Carbamidomethyl: 14; Acetyl: 26; Acetyl:2H(3): 21	CID	53 - 81	ALDH2_HUMAN	Aldehyde dehydrogenase, mitochondrial OS=Homo sapiens GN=ALDH2 PE=1 SV=2
25		true	9587	1059.1886	3174.5391	3	1.57	29.75	69.27	57.6 (M:57.6)	5	70.38	1	2	K.TFPTVNPSTGEVICQVAEGDKEDVDKAVK.A	Carbamidomethyl: 14; Acetyl: 26	CID	53 - 81	ALDH2_HUMAN	Aldehyde dehydrogenase, mitochondrial OS=Homo sapiens GN=ALDH2 PE=1 SV=2
28		true	10129	869.1881	3472.7144	4	2.58	66.77	72.37	33.8 (M:33.8)	10		1	3	K.TFPTVNPSTGEVICQVAEGDKEDVDKAVKAAR.A	Carbamidomethyl: 14; Acetyl: 29	CID	53 - 84	ALDH2_HUMAN	Aldehyde dehydrogenase, mitochondrial OS=Homo sapiens GN=ALDH2 PE=1 SV=2
29		true	10893	879.6902	3514.7250	4	1.95	10.14	76.68	59.8 (M:59.8)	8	99.49	1	3	K.TFPTVNPSTGEVICQVAEGDKEDVDKAVKAAR.A	Carbamidomethyl: 14; Acetyl: 26, 29	CID	53 - 84	ALDH2_HUMAN	Aldehyde dehydrogenase, mitochondrial OS=Homo sapiens GN=ALDH2 PE=1 SV=2
31		true	10871	881.1987	3520.7626	4	0.82	11.87	76.55	33.9 (M:33.9)	3	97.94	1	3	K.TFPTVNPSTGEVICQVAEGDKEDVDKAVKAAR.A	Carbamidomethyl: 14; Acetyl:2H(3): 26, 29	CID	53 - 84	ALDH2_HUMAN	Aldehyde dehydrogenase, mitochondrial OS=Homo sapiens GN=ALDH2 PE=1 SV=2
33		true	8274	566.8006	1131.5825	2	3.56	19.66	61.71	55.0 (M:55.0)	3		1	0	R.AAFQLGSPWR.R		CID	85 - 94	ALDH2_HUMAN	Aldehyde dehydrogenase, mitochondrial OS=Homo sapiens GN=ALDH2 PE=1 SV=2
34		true	6541	430.2358	1287.6836	3	1.54	311.20	51.79	25.3 (M:25.3)	2		1	1	R.AAFQLGSPWRR.M		CID	85 - 95	ALDH2_HUMAN	Aldehyde dehydrogenase, mitochondrial OS=Homo sapiens GN=ALDH2 PE=1 SV=2
35		true	4480	415.2435	828.4705	2	2.32	15.28	40.10	41.8 (M:41.8)	5		1	0	R.LADLIER.D		CID	108 - 114	ALDH2_HUMAN	Aldehyde dehydrogenase, mitochondrial OS=Homo sapiens GN=ALDH2 PE=1 SV=2
36		true	3355	367.5410	1099.5986	3	2.30	8.90	34.10	38.2 (M:38.2)	3		1	1	R.LADLIERDR.T		CID	108 - 116	ALDH2_HUMAN	Aldehyde dehydrogenase, mitochondrial OS=Homo sapiens GN=ALDH2 PE=1 SV=2
37		true	3946	487.2256	972.4341	2	2.56	92.44	37.19	48.2 (M:48.2)	3		1	0	R.YYAGWADK.Y		CID	148 - 155	ALDH2_HUMAN	Aldehyde dehydrogenase, mitochondrial OS=Homo sapiens GN=ALDH2 PE=1 SV=2
38		true	2985	365.4265	1457.6728	4	2.83	61.42	32.06	41.8 (M:41.8)	6		1	1	R.YYAGWADKYHGK.T		CID	148 - 159	ALDH2_HUMAN	Aldehyde dehydrogenase, mitochondrial OS=Homo sapiens GN=ALDH2 PE=1 SV=2
39		true	5185	500.9027	1499.6834	3	1.99	8.12	44.04	34.8 (M:34.8)	1		1	1	R.YYAGWADKYHGK.T	Acetyl: 8	CID	148 - 159	ALDH2_HUMAN	Aldehyde dehydrogenase, mitochondrial OS=Homo sapiens GN=ALDH2 PE=1 SV=2
40		true	5143	501.9092	1502.7022	3	2.42	5.35	43.83	56.9 (M:56.9)	2	99.56	1	1	R.YYAGWADKYHGK.T	Acetyl:2H(3): 8	CID	148 - 159	ALDH2_HUMAN	Aldehyde dehydrogenase, mitochondrial OS=Homo sapiens GN=ALDH2 PE=1 SV=2
41		true	10494	754.1104	3012.4083	4	1.36	14.84	74.45	38.6 (M:38.6)	5	50.00	1	2	R.YYAGWADKYHGKTIPIDGDFFSYTR.H	Acetyl: 8	CID	148 - 172	ALDH2_HUMAN	Aldehyde dehydrogenase, mitochondrial OS=Homo sapiens GN=ALDH2 PE=1 SV=2
42		true	9708	687.0032	2057.9847	3	1.45	9.56	69.97	65.5 (M:65.5)	3		1	1	K.YHGKTIPIDGDFFSYTR.H	Acetyl: 4	CID	156 - 172	ALDH2_HUMAN	Aldehyde dehydrogenase, mitochondrial OS=Homo sapiens GN=ALDH2 PE=1 SV=2
43		true	9697	688.0074	2061.0035	3	-1.60	8.16	69.92	59.8 (M:59.8)	1		1	1	K.YHGKTIPIDGDFFSYTR.H	Acetyl:2H(3): 4	CID	156 - 172	ALDH2_HUMAN	Aldehyde dehydrogenase, mitochondrial OS=Homo sapiens GN=ALDH2 PE=1 SV=2
44		true	10336	766.3767	1530.7355	2	2.17	289.29	73.59	82.7 (M:82.7)	18		1	0	K.TIPIDGDFFSYTR.H		CID	160 - 172	ALDH2_HUMAN	Aldehyde dehydrogenase, mitochondrial OS=Homo sapiens GN=ALDH2 PE=1 SV=2
45		true	7746	685.3984	1368.7799	2	1.66	7.17	58.74	89.2 (M:89.2)	4		1	0	K.LGPALATGNVVVMK.V		CID	196 - 209	ALDH2_HUMAN	Aldehyde dehydrogenase, mitochondrial OS=Homo sapiens GN=ALDH2 PE=1 SV=2
46		true	6264	693.3957	1384.7748	2	1.52	106.76	50.22	32.2 (M:32.2)	1		1	0	K.LGPALATGNVVVMK.V	Oxidation: 13	CID	196 - 209	ALDH2_HUMAN	Aldehyde dehydrogenase, mitochondrial OS=Homo sapiens GN=ALDH2 PE=1 SV=2
47		true	12685	615.3557	1843.0455	3	-0.19	5.43	87.63	46.4 (M:46.4)	12		1	0	K.VAEQTPLTALYVANLIK.E		CID	210 - 226	ALDH2_HUMAN	Aldehyde dehydrogenase, mitochondrial OS=Homo sapiens GN=ALDH2 PE=1 SV=2
48		true	11517	1007.1783	3018.5087	3	1.49	17.53	80.35	23.2 (M:23.2)	1		1	0	K.EAGFPPGVVNIVPGFGPTAGAAIASHEDVDK.V		CID	227 - 257	ALDH2_HUMAN	Aldehyde dehydrogenase, mitochondrial OS=Homo sapiens GN=ALDH2 PE=1 SV=2
49		true	4594	569.2998	1136.5826	2	2.11	25.07	40.77	77.9 (M:77.9)	3		1	0	K.VAFTGSTEIGR.V		CID	258 - 268	ALDH2_HUMAN	Aldehyde dehydrogenase, mitochondrial OS=Homo sapiens GN=ALDH2 PE=1 SV=2
50		true	3639	593.8448	1185.6717	2	2.72	7.90	35.53	89.1 (M:89.1)	8		1	0	R.VIQVAAGSSNLK.R		CID	269 - 280	ALDH2_HUMAN	Aldehyde dehydrogenase, mitochondrial OS=Homo sapiens GN=ALDH2 PE=1 SV=2
51		true	2568	448.2663	1341.7728	3	3.12	9.37	29.80	104.4 (M:104.4)	11		1	1	R.VIQVAAGSSNLKR.V		CID	269 - 281	ALDH2_HUMAN	Aldehyde dehydrogenase, mitochondrial OS=Homo sapiens GN=ALDH2 PE=1 SV=2
52		true	4639	692.8996	1383.7834	2	0.91	6.38	41.02	75.3 (M:75.3)	1		1	1	R.VIQVAAGSSNLKR.V	Acetyl: 12	CID	269 - 281	ALDH2_HUMAN	Aldehyde dehydrogenase, mitochondrial OS=Homo sapiens GN=ALDH2 PE=1 SV=2
53		true	4624	694.4099	1386.8022	2	2.11	162.61	40.92	65.9 (M:65.9)	4		1	1	R.VIQVAAGSSNLKR.V	Acetyl:2H(3): 12	CID	269 - 281	ALDH2_HUMAN	Aldehyde dehydrogenase, mitochondrial OS=Homo sapiens GN=ALDH2 PE=1 SV=2
54		true	2965	324.8679	971.5764	3	5.54	13.04	31.92	26.9 (M:26.9)	2		1	1	K.RVTLELGGK.S		CID	281 - 289	ALDH2_HUMAN	Aldehyde dehydrogenase, mitochondrial OS=Homo sapiens GN=ALDH2 PE=1 SV=2
55		true	4257	408.7461	815.4753	2	2.93	2.13	38.83	49.5 (M:49.5)	5		1	0	R.VTLELGGK.S		CID	282 - 289	ALDH2_HUMAN	Aldehyde dehydrogenase, mitochondrial OS=Homo sapiens GN=ALDH2 PE=1 SV=2
56		true	10540	895.4186	1788.8206	2	1.07	3.41	74.74	99.6 (M:99.6)	33		1	0	R.TFVQEDIYDEFVER.S		CID	325 - 338	ALDH2_HUMAN	Aldehyde dehydrogenase, mitochondrial OS=Homo sapiens GN=ALDH2 PE=1 SV=2
57		true	10410	735.0265	2202.0593	3	-0.76	131.31	73.99	27.8 (M:27.8)	1		1	1	R.TFVQEDIYDEFVERSVAR.A		CID	325 - 342	ALDH2_HUMAN	Aldehyde dehydrogenase, mitochondrial OS=Homo sapiens GN=ALDH2 PE=1 SV=2
58		true	3275	402.5477	1204.6200	3	0.92	12.16	33.67	25.1 (M:25.1)	2		1	1	K.SRVVGNPFDSK.T		CID	345 - 355	ALDH2_HUMAN	Aldehyde dehydrogenase, mitochondrial OS=Homo sapiens GN=ALDH2 PE=1 SV=2
59		true	4306	481.7518	961.4869	2	2.27	4.39	39.09	62.2 (M:62.2)	7		1	0	R.VVGNPFDSK.T		CID	347 - 355	ALDH2_HUMAN	Aldehyde dehydrogenase, mitochondrial OS=Homo sapiens GN=ALDH2 PE=1 SV=2
60		true	6700	817.4010	2449.1761	3	2.08	4.92	52.67	128.2 (M:128.2)	12		1	1	R.VVGNPFDSKTEQGPQVDETQFK.K		CID	347 - 368	ALDH2_HUMAN	Aldehyde dehydrogenase, mitochondrial OS=Homo sapiens GN=ALDH2 PE=1 SV=2
61		true	8324	831.4050	2491.1867	3	2.57	4.51	61.97	71.4 (M:71.4)	9		1	1	R.VVGNPFDSKTEQGPQVDETQFK.K	Acetyl: 9	CID	347 - 368	ALDH2_HUMAN	Aldehyde dehydrogenase, mitochondrial OS=Homo sapiens GN=ALDH2 PE=1 SV=2
62		true	5572	645.3269	2577.2711	4	2.93	102.96	46.27	73.7 (M:73.7)	1		1	2	R.VVGNPFDSKTEQGPQVDETQFKK.I		CID	347 - 369	ALDH2_HUMAN	Aldehyde dehydrogenase, mitochondrial OS=Homo sapiens GN=ALDH2 PE=1 SV=2
63		true	6968	655.8295	2619.2817	4	2.70	11.68	54.22	75.6 (M:75.6)	7		1	2	R.VVGNPFDSKTEQGPQVDETQFKK.I	Acetyl: 9	CID	347 - 369	ALDH2_HUMAN	Aldehyde dehydrogenase, mitochondrial OS=Homo sapiens GN=ALDH2 PE=1 SV=2
64		true	7026	655.8299	2619.2817	4	3.35	195.31	54.54	21.1 (M:21.1)	1	50.00	1	2	R.VVGNPFDSKTEQGPQVDETQFKK.I	Acetyl: 23	CID	347 - 369	ALDH2_HUMAN	Aldehyde dehydrogenase, mitochondrial OS=Homo sapiens GN=ALDH2 PE=1 SV=2
65		true	8499	666.3327	2661.2922	4	3.57	5.92	62.93	58.8 (M:58.8)	3	50.00	1	2	R.VVGNPFDSKTEQGPQVDETQFKK.I	Acetyl: 9, 23	CID	347 - 369	ALDH2_HUMAN	Aldehyde dehydrogenase, mitochondrial OS=Homo sapiens GN=ALDH2 PE=1 SV=2
66		true	8472	667.8420	2667.3299	4	3.43	10.42	62.78	67.5 (M:67.5)	8	50.00	1	2	R.VVGNPFDSKTEQGPQVDETQFKK.I	Acetyl:2H(3): 9, 23	CID	347 - 369	ALDH2_HUMAN	Aldehyde dehydrogenase, mitochondrial OS=Homo sapiens GN=ALDH2 PE=1 SV=2
67		true	3805	753.8585	1505.6998	2	1.71	6.31	36.44	99.2 (M:99.2)	8		1	0	K.TEQGPQVDETQFK.K		CID	356 - 368	ALDH2_HUMAN	Aldehyde dehydrogenase, mitochondrial OS=Homo sapiens GN=ALDH2 PE=1 SV=2
68		true	2607	545.6074	1633.7948	3	3.46	7.83	30.04	104.0 (M:104.0)	7		1	1	K.TEQGPQVDETQFKK.I		CID	356 - 369	ALDH2_HUMAN	Aldehyde dehydrogenase, mitochondrial OS=Homo sapiens GN=ALDH2 PE=1 SV=2
69		true	4586	838.9107	1675.8053	2	0.89	9.53	40.72	26.4 (M:26.4)	1	50.00	1	1	K.TEQGPQVDETQFKK.I	Acetyl: 13	CID	356 - 369	ALDH2_HUMAN	Aldehyde dehydrogenase, mitochondrial OS=Homo sapiens GN=ALDH2 PE=1 SV=2
70		true	4549	840.4193	1678.8242	2	-0.03	21.29	40.51	90.0 (M:90.0)	9	50.00	1	1	K.TEQGPQVDETQFKK.I	Acetyl:2H(3): 13	CID	356 - 369	ALDH2_HUMAN	Aldehyde dehydrogenase, mitochondrial OS=Homo sapiens GN=ALDH2 PE=1 SV=2
71		true	13134	895.4742	2683.3976	3	1.20	13.42	90.42	39.7 (M:39.7)	3		1	2	K.TEQGPQVDETQFKKILGYINTGK.Q	Acetyl:2H(3): 13, 14	CID	356 - 378	ALDH2_HUMAN	Aldehyde dehydrogenase, mitochondrial OS=Homo sapiens GN=ALDH2 PE=1 SV=2
72		true	13143	809.1654	3232.6252	4	2.27	247.72	90.51	28.2 (M:28.2)	2		1	3	K.TEQGPQVDETQFKKILGYINTGKQEGAK.L	Acetyl: 13, 14, 23	CID	356 - 383	ALDH2_HUMAN	Aldehyde dehydrogenase, mitochondrial OS=Homo sapiens GN=ALDH2 PE=1 SV=2
73		true	13121	811.4305	3241.6817	4	3.46	37.93	90.37	34.6 (M:34.6)	2	97.10	1	3	K.TEQGPQVDETQFKKILGYINTGKQEGAK.L	Acetyl:2H(3): 13, 14, 23	CID	356 - 383	ALDH2_HUMAN	Aldehyde dehydrogenase, mitochondrial OS=Homo sapiens GN=ALDH2 PE=1 SV=2
75		true	6365	574.8382	1147.6601	2	1.56	309.19	50.79	50.4 (M:50.4)	1		1	1	K.KILGYINTGK.Q	Acetyl: 1	CID	369 - 378	ALDH2_HUMAN	Aldehyde dehydrogenase, mitochondrial OS=Homo sapiens GN=ALDH2 PE=1 SV=2
76		true	6356	576.3482	1150.6789	2	2.52	6.94	50.74	47.5 (M:47.5)	3		1	1	K.KILGYINTGK.Q	Acetyl:2H(3): 1	CID	369 - 378	ALDH2_HUMAN	Aldehyde dehydrogenase, mitochondrial OS=Homo sapiens GN=ALDH2 PE=1 SV=2
77		true	4762	554.6471	1660.9148	3	2.74	14.36	41.70	51.8 (M:51.8)	2	99.96	1	2	K.KILGYINTGKQEGAK.L	Acetyl: 10	CID	369 - 383	ALDH2_HUMAN	Aldehyde dehydrogenase, mitochondrial OS=Homo sapiens GN=ALDH2 PE=1 SV=2
78		true	4739	555.6524	1663.9337	3	1.05	7.54	41.59	45.1 (M:45.1)	2	99.51	1	2	K.KILGYINTGKQEGAK.L	Acetyl:2H(3): 10	CID	369 - 383	ALDH2_HUMAN	Aldehyde dehydrogenase, mitochondrial OS=Homo sapiens GN=ALDH2 PE=1 SV=2
80		true	6942	852.4702	1702.9254	2	0.31	155.23	54.07	63.4 (M:63.4)	3	93.23	1	2	K.KILGYINTGKQEGAK.L	Acetyl: 1, 10	CID	369 - 383	ALDH2_HUMAN	Aldehyde dehydrogenase, mitochondrial OS=Homo sapiens GN=ALDH2 PE=1 SV=2
81		true	6924	855.4893	1708.9630	2	0.59	241.75	53.97	55.8 (M:55.8)	3	99.79	1	2	K.KILGYINTGKQEGAK.L	Acetyl:2H(3): 1, 10	CID	369 - 383	ALDH2_HUMAN	Aldehyde dehydrogenase, mitochondrial OS=Homo sapiens GN=ALDH2 PE=1 SV=2
82		true	11944	946.8518	2837.5420	3	-2.94	41.99	82.96	26.4 (M:26.4)	1		1	3	K.KILGYINTGKQEGAKLLCGGGIAADR.G	Carbamidomethyl: 18; Acetyl:2H(3): 1, 10, 15	CID	369 - 394	ALDH2_HUMAN	Aldehyde dehydrogenase, mitochondrial OS=Homo sapiens GN=ALDH2 PE=1 SV=2
83		true	4984	489.7855	977.5546	2	1.80	2.40	42.96	67.2 (M:67.2)	4		1	0	K.ILGYINTGK.Q		CID	370 - 378	ALDH2_HUMAN	Aldehyde dehydrogenase, mitochondrial OS=Homo sapiens GN=ALDH2 PE=1 SV=2
84		true	3612	497.9448	1490.8093	3	2.21	16.80	35.38	108.0 (M:108.0)	5		1	1	K.ILGYINTGKQEGAK.L		CID	370 - 383	ALDH2_HUMAN	Aldehyde dehydrogenase, mitochondrial OS=Homo sapiens GN=ALDH2 PE=1 SV=2
85		true	5792	767.4180	1532.8199	2	1.04	6.25	47.54	82.0 (M:82.0)	4	99.90	1	1	K.ILGYINTGKQEGAK.L	Acetyl: 9	CID	370 - 383	ALDH2_HUMAN	Aldehyde dehydrogenase, mitochondrial OS=Homo sapiens GN=ALDH2 PE=1 SV=2
86		true	5780	768.9273	1535.8387	2	0.92	4.82	47.49	75.6 (M:75.6)	8	99.04	1	1	K.ILGYINTGKQEGAK.L	Acetyl:2H(3): 9	CID	370 - 383	ALDH2_HUMAN	Aldehyde dehydrogenase, mitochondrial OS=Homo sapiens GN=ALDH2 PE=1 SV=2
87		true	9071	873.1319	2616.3694	3	1.72	123.19	66.22	28.8 (M:28.8)	2	70.29	1	2	K.ILGYINTGKQEGAKLLCGGGIAADR.G	Carbamidomethyl: 17; Acetyl: 14	CID	370 - 394	ALDH2_HUMAN	Aldehyde dehydrogenase, mitochondrial OS=Homo sapiens GN=ALDH2 PE=1 SV=2
88		true	11190	887.1354	2658.3799	3	1.69	31.83	78.46	57.0 (M:57.0)	7		1	2	K.ILGYINTGKQEGAKLLCGGGIAADR.G	Carbamidomethyl: 17; Acetyl: 9, 14	CID	370 - 394	ALDH2_HUMAN	Aldehyde dehydrogenase, mitochondrial OS=Homo sapiens GN=ALDH2 PE=1 SV=2
89		true	11177	889.1463	2664.4176	3	-0.20	9.76	78.41	37.6 (M:37.6)	3		1	2	K.ILGYINTGKQEGAKLLCGGGIAADR.G	Carbamidomethyl: 17; Acetyl:2H(3): 9, 14	CID	370 - 394	ALDH2_HUMAN	Aldehyde dehydrogenase, mitochondrial OS=Homo sapiens GN=ALDH2 PE=1 SV=2
90		true	6520	553.2838	1656.8254	3	2.61	12.34	51.65	60.2 (M:60.2)	5		1	1	K.QEGAKLLCGGGIAADR.G	Carbamidomethyl: 8; Acetyl: 5	CID	379 - 394	ALDH2_HUMAN	Aldehyde dehydrogenase, mitochondrial OS=Homo sapiens GN=ALDH2 PE=1 SV=2
91		true	6463	830.9301	1659.8442	2	0.87	9.44	51.34	74.6 (M:74.6)	6		1	1	K.QEGAKLLCGGGIAADR.G	Carbamidomethyl: 8; Acetyl:2H(3): 5	CID	379 - 394	ALDH2_HUMAN	Aldehyde dehydrogenase, mitochondrial OS=Homo sapiens GN=ALDH2 PE=1 SV=2
92		true	3804	551.7891	1101.5601	2	3.22	3.05	36.44	71.6 (M:71.6)	9		1	0	K.LLCGGGIAADR.G	Carbamidomethyl: 3	CID	384 - 394	ALDH2_HUMAN	Aldehyde dehydrogenase, mitochondrial OS=Homo sapiens GN=ALDH2 PE=1 SV=2
93		true	11831	1094.0437	2186.0718	2	0.47	247.00	82.28	49.3 (M:49.3)	3		1	0	R.GYFIQPTVFGDVQDGMTIAK.E		CID	395 - 414	ALDH2_HUMAN	Aldehyde dehydrogenase, mitochondrial OS=Homo sapiens GN=ALDH2 PE=1 SV=2
94		true	12338	702.3846	1402.7530	2	1.20	11.89	85.53	60.4 (M:60.4)	13		1	0	K.EEIFGPVMQILK.F		CID	415 - 426	ALDH2_HUMAN	Aldehyde dehydrogenase, mitochondrial OS=Homo sapiens GN=ALDH2 PE=1 SV=2
95		true	5192	393.2250	1176.6503	3	2.33	8.48	44.09	67.6 (M:67.6)	2		1	1	K.FKTIEEVVGR.A		CID	427 - 436	ALDH2_HUMAN	Aldehyde dehydrogenase, mitochondrial OS=Homo sapiens GN=ALDH2 PE=1 SV=2
96		true	7796	610.3393	1218.6608	2	2.69	7.55	59.07	67.8 (M:67.8)	6		1	1	K.FKTIEEVVGR.A	Acetyl: 2	CID	427 - 436	ALDH2_HUMAN	Aldehyde dehydrogenase, mitochondrial OS=Homo sapiens GN=ALDH2 PE=1 SV=2
97		true	7812	611.8484	1221.6797	2	2.12	5.01	59.17	60.2 (M:60.2)	4		1	1	K.FKTIEEVVGR.A	Acetyl:2H(3): 2	CID	427 - 436	ALDH2_HUMAN	Aldehyde dehydrogenase, mitochondrial OS=Homo sapiens GN=ALDH2 PE=1 SV=2
98		true	3204	451.7514	901.4869	2	1.45	3.58	33.23	48.6 (M:48.6)	4		1	0	K.TIEEVVGR.A		CID	429 - 436	ALDH2_HUMAN	Aldehyde dehydrogenase, mitochondrial OS=Homo sapiens GN=ALDH2 PE=1 SV=2
99		true	8615	764.3953	1526.7729	2	2.05	4.30	63.65	128.5 (M:128.5)	24		1	0	R.ANNSTYGLAAAVFTK.D		CID	437 - 451	ALDH2_HUMAN	Aldehyde dehydrogenase, mitochondrial OS=Homo sapiens GN=ALDH2 PE=1 SV=2
100		true	11286	681.0174	2040.0164	3	6.87	42.99	79.03	41.5 (M:41.5)	1	92.84	1	1	R.ANNSTYGLAAAVFTKDLDK.A	Acetyl: 15	CID	437 - 455	ALDH2_HUMAN	Aldehyde dehydrogenase, mitochondrial OS=Homo sapiens GN=ALDH2 PE=1 SV=2
102		true	7991	800.4004	1598.7828	2	2.13	12.72	60.12	87.2 (M:87.2)	14		1	0	R.ELGEYGLQAYTEVK.T		CID	493 - 506	ALDH2_HUMAN	Aldehyde dehydrogenase, mitochondrial OS=Homo sapiens GN=ALDH2 PE=1 SV=2
103		true	10800	724.0488	2169.1205	3	1.87	20.37	76.16	45.2 (M:45.2)	2	99.11	1	1	R.ELGEYGLQAYTEVKTVTVK.V	Acetyl: 14	CID	493 - 511	ALDH2_HUMAN	Aldehyde dehydrogenase, mitochondrial OS=Homo sapiens GN=ALDH2 PE=1 SV=2
105		true	3338	521.3198	1040.6230	2	2.04	13.07	34.00	51.1 (M:51.1)	4	99.83	1	1	K.TVTVKVPQK.N	Acetyl: 5	CID	507 - 515	ALDH2_HUMAN	Aldehyde dehydrogenase, mitochondrial OS=Homo sapiens GN=ALDH2 PE=1 SV=2
106		true	3294	522.8294	1043.6418	2	2.22	3.89	33.78	30.9 (M:30.9)	3		1	1	K.TVTVKVPQK.N	Acetyl:2H(3): 5	CID	507 - 515	ALDH2_HUMAN	Aldehyde dehydrogenase, mitochondrial OS=Homo sapiens GN=ALDH2 PE=1 SV=2
107		true	1378	400.9036	1199.6874	3	1.39	265.48	23.50	22.5 (M:22.5)	1		1	2	K.TVTVKVPQKNS.-		CID	507 - 517	ALDH2_HUMAN	Aldehyde dehydrogenase, mitochondrial OS=Homo sapiens GN=ALDH2 PE=1 SV=2
108		true	3103	621.8576	1241.6980	2	2.15	8.01	32.68	32.5 (M:32.5)	2		1	2	K.TVTVKVPQKNS.-	Acetyl: 5	CID	507 - 517	ALDH2_HUMAN	Aldehyde dehydrogenase, mitochondrial OS=Homo sapiens GN=ALDH2 PE=1 SV=2
109		true	3116	623.3659	1244.7168	2	0.37	238.00	32.74	37.5 (M:37.5)	2		1	2	K.TVTVKVPQKNS.-	Acetyl:2H(3): 5	CID	507 - 517	ALDH2_HUMAN	Aldehyde dehydrogenase, mitochondrial OS=Homo sapiens GN=ALDH2 PE=1 SV=2

## Sheet: Sample 2
Row	User Flag	OK	Cmpd.	m/z meas.	Mr calc.	z	Δ m/z [ppm]	RMS90 [ppm]	Rt [min]	Scores	#Cmpds.	Site [%]	Rank	P	Sequence	Modifications	Type	Range	Accession	Protein
1		true	7347	741.6145	2962.4230	4	1.97	8.94	56.80	113.3 (M:113.3)	11		1	2	R.KTFPTVNPSTGEVICQVAEGDKEDVDK.A	Carbamidomethyl: 15	CID	52 - 78	ALDH2_HUMAN	Aldehyde dehydrogenase, mitochondrial OS=Homo sapiens GN=ALDH2 PE=1 SV=2									52 - 78	R.KTFPTVNPSTGEVICQVAEGDKEDVDK.A
2		true	8683	1002.4857	3004.4335	3	0.57	21.61	64.52	72.6 (M:72.6)	14	93.08	1	2	R.KTFPTVNPSTGEVICQVAEGDKEDVDK.A	Carbamidomethyl: 15; Acetyl: 22	CID	52 - 78	ALDH2_HUMAN	Aldehyde dehydrogenase, mitochondrial OS=Homo sapiens GN=ALDH2 PE=1 SV=2
3		true	10324	1018.5039	3052.4818	3	2.67	14.63	74.13	49.4 (M:49.4)	4	99.32	1	2	R.KTFPTVNPSTGEVICQVAEGDKEDVDK.A	Carbamidomethyl: 15; Acetyl:2H(3): 1, 22	CID	52 - 78	ALDH2_HUMAN	Aldehyde dehydrogenase, mitochondrial OS=Homo sapiens GN=ALDH2 PE=1 SV=2
4		true	7657	653.1331	3260.6235	5	1.77	11.16	58.63	53.9 (M:53.9)	2		1	3	R.KTFPTVNPSTGEVICQVAEGDKEDVDKAVK.A	Carbamidomethyl: 15	CID	52 - 81	ALDH2_HUMAN	Aldehyde dehydrogenase, mitochondrial OS=Homo sapiens GN=ALDH2 PE=1 SV=2
5		true	9965	670.5423	3347.6634	5	3.53	205.42	72.06	26.5 (M:26.5)	1	35.73	1	3	R.KTFPTVNPSTGEVICQVAEGDKEDVDKAVK.A	Carbamidomethyl: 15; Acetyl: 22; Acetyl:2H(3): 27	CID	52 - 81	ALDH2_HUMAN	Aldehyde dehydrogenase, mitochondrial OS=Homo sapiens GN=ALDH2 PE=1 SV=2
6		true	8335	826.6663	3302.6340	4	0.67	25.83	62.45	88.4 (M:88.4)	10	84.33	1	3	R.KTFPTVNPSTGEVICQVAEGDKEDVDKAVK.A	Carbamidomethyl: 15; Acetyl: 30	CID	52 - 81	ALDH2_HUMAN	Aldehyde dehydrogenase, mitochondrial OS=Homo sapiens GN=ALDH2 PE=1 SV=2
7		true	9722	838.6785	3350.6823	4	0.83	10.88	70.55	43.0 (M:43.0)	6	81.16	1	3	R.KTFPTVNPSTGEVICQVAEGDKEDVDKAVK.A	Carbamidomethyl: 15; Acetyl:2H(3): 1, 27	CID	52 - 81	ALDH2_HUMAN	Aldehyde dehydrogenase, mitochondrial OS=Homo sapiens GN=ALDH2 PE=1 SV=2
8		true	9713	838.6794	3350.6823	4	1.82	51.48	70.50	32.1 (M:32.1)	7	33.33	1	3	R.KTFPTVNPSTGEVICQVAEGDKEDVDKAVK.A	Carbamidomethyl: 15; Acetyl:2H(3): 1, 22	CID	52 - 81	ALDH2_HUMAN	Aldehyde dehydrogenase, mitochondrial OS=Homo sapiens GN=ALDH2 PE=1 SV=2
9		true	11460	849.9385	3395.7117	4	3.91	18.54	80.87	41.9 (M:41.9)	4	84.87	1	3	R.KTFPTVNPSTGEVICQVAEGDKEDVDKAVK.A	Carbamidomethyl: 15; Acetyl:2H(3): 1, 22, 27	CID	52 - 81	ALDH2_HUMAN	Aldehyde dehydrogenase, mitochondrial OS=Homo sapiens GN=ALDH2 PE=1 SV=2
10		true	9972	1115.8897	3344.6446	3	0.80	17.11	72.10	60.7 (M:60.7)	11	63.58	1	3	R.KTFPTVNPSTGEVICQVAEGDKEDVDKAVK.A	Carbamidomethyl: 15; Acetyl: 22, 27	CID	52 - 81	ALDH2_HUMAN	Aldehyde dehydrogenase, mitochondrial OS=Homo sapiens GN=ALDH2 PE=1 SV=2
12		true	8672	945.7839	2834.3280	3	0.65	6.18	64.43	163.2 (M:163.2)	7		1	1	K.TFPTVNPSTGEVICQVAEGDKEDVDK.A	Carbamidomethyl: 14	CID	53 - 78	ALDH2_HUMAN	Aldehyde dehydrogenase, mitochondrial OS=Homo sapiens GN=ALDH2 PE=1 SV=2
13		true	10129	959.7890	2876.3386	3	2.25	7.09	73.05	54.0 (M:54.0)	3	99.82	1	1	K.TFPTVNPSTGEVICQVAEGDKEDVDK.A	Carbamidomethyl: 14; Acetyl: 21	CID	53 - 78	ALDH2_HUMAN	Aldehyde dehydrogenase, mitochondrial OS=Homo sapiens GN=ALDH2 PE=1 SV=2
16		true	8759	784.1398	3132.5285	4	0.53	50.29	64.94	94.4 (M:94.4)	5		1	2	K.TFPTVNPSTGEVICQVAEGDKEDVDKAVK.A	Carbamidomethyl: 14	CID	53 - 81	ALDH2_HUMAN	Aldehyde dehydrogenase, mitochondrial OS=Homo sapiens GN=ALDH2 PE=1 SV=2
17		true	9544	794.6432	3174.5391	4	1.50	16.82	69.45	68.1 (M:68.1)	5	75.03	1	2	K.TFPTVNPSTGEVICQVAEGDKEDVDKAVK.A	Carbamidomethyl: 14; Acetyl: 26	CID	53 - 81	ALDH2_HUMAN	Aldehyde dehydrogenase, mitochondrial OS=Homo sapiens GN=ALDH2 PE=1 SV=2
19		true	11339	1075.2033	3222.5873	3	0.27	15.55	80.16	39.6 (M:39.6)	3	94.08	1	2	K.TFPTVNPSTGEVICQVAEGDKEDVDKAVK.A	Carbamidomethyl: 14; Acetyl:2H(3): 21, 26	CID	53 - 81	ALDH2_HUMAN	Aldehyde dehydrogenase, mitochondrial OS=Homo sapiens GN=ALDH2 PE=1 SV=2
21		true	10034	869.1879	3472.7144	4	2.36	21.51	72.47	39.4 (M:39.4)	6	96.91	1	3	K.TFPTVNPSTGEVICQVAEGDKEDVDKAVKAAR.A	Carbamidomethyl: 14; Acetyl: 29	CID	53 - 84	ALDH2_HUMAN	Aldehyde dehydrogenase, mitochondrial OS=Homo sapiens GN=ALDH2 PE=1 SV=2
22		true	10803	879.6902	3514.7250	4	1.87	123.23	76.90	41.2 (M:41.2)	3	89.41	1	3	K.TFPTVNPSTGEVICQVAEGDKEDVDKAVKAAR.A	Carbamidomethyl: 14; Acetyl: 26, 29	CID	53 - 84	ALDH2_HUMAN	Aldehyde dehydrogenase, mitochondrial OS=Homo sapiens GN=ALDH2 PE=1 SV=2
23		true	10780	881.2049	3520.7626	4	7.88	243.53	76.74	20.7 (M:20.7)	1	74.08	1	3	K.TFPTVNPSTGEVICQVAEGDKEDVDKAVKAAR.A	Carbamidomethyl: 14; Acetyl:2H(3): 26, 29	CID	53 - 84	ALDH2_HUMAN	Aldehyde dehydrogenase, mitochondrial OS=Homo sapiens GN=ALDH2 PE=1 SV=2
24		true	12836	890.1943	3556.7355	4	3.50	18.68	89.35	25.7 (M:25.7)	2		1	3	K.TFPTVNPSTGEVICQVAEGDKEDVDKAVKAAR.A	Carbamidomethyl: 14; Acetyl: 21, 26, 29	CID	53 - 84	ALDH2_HUMAN	Aldehyde dehydrogenase, mitochondrial OS=Homo sapiens GN=ALDH2 PE=1 SV=2
25		true	12817	892.4584	3565.7920	4	3.46	40.72	89.24	25.4 (M:25.4)	2		1	3	K.TFPTVNPSTGEVICQVAEGDKEDVDKAVKAAR.A	Carbamidomethyl: 14; Acetyl:2H(3): 21, 26, 29	CID	53 - 84	ALDH2_HUMAN	Aldehyde dehydrogenase, mitochondrial OS=Homo sapiens GN=ALDH2 PE=1 SV=2
26		true	8219	566.8000	1131.5825	2	2.52	4.64	61.83	54.2 (M:54.2)	3		1	0	R.AAFQLGSPWR.R		CID	85 - 94	ALDH2_HUMAN	Aldehyde dehydrogenase, mitochondrial OS=Homo sapiens GN=ALDH2 PE=1 SV=2
27		true	6517	430.2363	1287.6836	3	2.66	69.50	51.95	22.6 (M:22.6)	1		1	1	R.AAFQLGSPWRR.M		CID	85 - 95	ALDH2_HUMAN	Aldehyde dehydrogenase, mitochondrial OS=Homo sapiens GN=ALDH2 PE=1 SV=2
28		true	4496	415.2430	828.4705	2	1.14	10.97	40.47	41.4 (M:41.4)	4		1	0	R.LADLIER.D		CID	108 - 114	ALDH2_HUMAN	Aldehyde dehydrogenase, mitochondrial OS=Homo sapiens GN=ALDH2 PE=1 SV=2
29		true	3387	367.5405	1099.5986	3	0.86	22.21	34.47	44.9 (M:44.9)	4		1	1	R.LADLIERDR.T		CID	108 - 116	ALDH2_HUMAN	Aldehyde dehydrogenase, mitochondrial OS=Homo sapiens GN=ALDH2 PE=1 SV=2
30		true	4023	487.2248	972.4341	2	1.02	9.23	37.90	50.3 (M:50.3)	2		1	0	R.YYAGWADK.Y		CID	148 - 155	ALDH2_HUMAN	Aldehyde dehydrogenase, mitochondrial OS=Homo sapiens GN=ALDH2 PE=1 SV=2
31		true	3020	365.4260	1457.6728	4	1.41	6.40	32.36	42.6 (M:42.6)	6		1	1	R.YYAGWADKYHGK.T		CID	148 - 159	ALDH2_HUMAN	Aldehyde dehydrogenase, mitochondrial OS=Homo sapiens GN=ALDH2 PE=1 SV=2
32		true	5142	501.9081	1502.7022	3	0.16	11.99	44.12	47.3 (M:47.3)	2	99.73	1	1	R.YYAGWADKYHGK.T	Acetyl:2H(3): 8	CID	148 - 159	ALDH2_HUMAN	Aldehyde dehydrogenase, mitochondrial OS=Homo sapiens GN=ALDH2 PE=1 SV=2
34		true	10409	754.1106	3012.4083	4	1.68	9.74	74.63	61.8 (M:61.8)	9	94.49	1	2	R.YYAGWADKYHGKTIPIDGDFFSYTR.H	Acetyl: 12	CID	148 - 172	ALDH2_HUMAN	Aldehyde dehydrogenase, mitochondrial OS=Homo sapiens GN=ALDH2 PE=1 SV=2
36		true	9666	687.0034	2057.9847	3	1.79	6.60	70.20	77.4 (M:77.4)	5		1	1	K.YHGKTIPIDGDFFSYTR.H	Acetyl: 4	CID	156 - 172	ALDH2_HUMAN	Aldehyde dehydrogenase, mitochondrial OS=Homo sapiens GN=ALDH2 PE=1 SV=2
37		true	9645	688.0064	2061.0035	3	-2.92	5.57	70.06	55.9 (M:55.9)	1		1	1	K.YHGKTIPIDGDFFSYTR.H	Acetyl:2H(3): 4	CID	156 - 172	ALDH2_HUMAN	Aldehyde dehydrogenase, mitochondrial OS=Homo sapiens GN=ALDH2 PE=1 SV=2
38		true	10252	766.3763	1530.7355	2	1.66	3.10	73.76	91.6 (M:91.6)	11		1	0	K.TIPIDGDFFSYTR.H		CID	160 - 172	ALDH2_HUMAN	Aldehyde dehydrogenase, mitochondrial OS=Homo sapiens GN=ALDH2 PE=1 SV=2
39		true	7713	685.3975	1368.7799	2	0.44	8.52	58.94	97.0 (M:97.0)	3		1	0	K.LGPALATGNVVVMK.V		CID	196 - 209	ALDH2_HUMAN	Aldehyde dehydrogenase, mitochondrial OS=Homo sapiens GN=ALDH2 PE=1 SV=2
40		true	12550	615.3570	1843.0455	3	1.97	18.53	87.60	76.5 (M:76.5)	15		1	0	K.VAEQTPLTALYVANLIK.E		CID	210 - 226	ALDH2_HUMAN	Aldehyde dehydrogenase, mitochondrial OS=Homo sapiens GN=ALDH2 PE=1 SV=2
41		true	11405	755.6379	3018.5087	4	4.59	60.20	80.52	36.4 (M:36.4)	7		1	0	K.EAGFPPGVVNIVPGFGPTAGAAIASHEDVDK.V		CID	227 - 257	ALDH2_HUMAN	Aldehyde dehydrogenase, mitochondrial OS=Homo sapiens GN=ALDH2 PE=1 SV=2
42		true	11858	1035.2837	4137.0807	4	6.05	98.12	83.35	33.8 (M:33.8)	13		1	1	K.EAGFPPGVVNIVPGFGPTAGAAIASHEDVDKVAFTGSTEIGR.V		CID	227 - 268	ALDH2_HUMAN	Aldehyde dehydrogenase, mitochondrial OS=Homo sapiens GN=ALDH2 PE=1 SV=2
43		true	4606	569.2998	1136.5826	2	2.20	6.54	41.08	77.6 (M:77.6)	3		1	0	K.VAFTGSTEIGR.V		CID	258 - 268	ALDH2_HUMAN	Aldehyde dehydrogenase, mitochondrial OS=Homo sapiens GN=ALDH2 PE=1 SV=2
44		true	3664	593.8443	1185.6717	2	1.98	304.03	35.95	94.6 (M:94.6)	9		1	0	R.VIQVAAGSSNLK.R		CID	269 - 280	ALDH2_HUMAN	Aldehyde dehydrogenase, mitochondrial OS=Homo sapiens GN=ALDH2 PE=1 SV=2
45		true	2532	448.2649	1341.7728	3	-0.07	7.67	29.68	92.8 (M:92.8)	10		1	1	R.VIQVAAGSSNLKR.V		CID	269 - 281	ALDH2_HUMAN	Aldehyde dehydrogenase, mitochondrial OS=Homo sapiens GN=ALDH2 PE=1 SV=2
46		true	4653	692.8988	1383.7834	2	-0.32	16.01	41.34	25.8 (M:25.8)	1		1	1	R.VIQVAAGSSNLKR.V	Acetyl: 12	CID	269 - 281	ALDH2_HUMAN	Aldehyde dehydrogenase, mitochondrial OS=Homo sapiens GN=ALDH2 PE=1 SV=2
47		true	4641	694.4094	1386.8022	2	1.43	12.35	41.25	74.5 (M:74.5)	5		1	1	R.VIQVAAGSSNLKR.V	Acetyl:2H(3): 12	CID	269 - 281	ALDH2_HUMAN	Aldehyde dehydrogenase, mitochondrial OS=Homo sapiens GN=ALDH2 PE=1 SV=2
48		true	4270	408.7450	815.4753	2	0.24	3.30	39.20	55.2 (M:55.2)	7		1	0	R.VTLELGGK.S		CID	282 - 289	ALDH2_HUMAN	Aldehyde dehydrogenase, mitochondrial OS=Homo sapiens GN=ALDH2 PE=1 SV=2
49		true	10461	895.4192	1788.8206	2	1.74	4.11	74.93	99.7 (M:99.7)	27		1	0	R.TFVQEDIYDEFVER.S		CID	325 - 338	ALDH2_HUMAN	Aldehyde dehydrogenase, mitochondrial OS=Homo sapiens GN=ALDH2 PE=1 SV=2
50		true	3282	402.5471	1204.6200	3	-0.57	11.88	33.89	23.6 (M:23.6)	1		1	1	K.SRVVGNPFDSK.T		CID	345 - 355	ALDH2_HUMAN	Aldehyde dehydrogenase, mitochondrial OS=Homo sapiens GN=ALDH2 PE=1 SV=2
52		true	4303	481.7511	961.4869	2	0.72	5.39	39.35	64.5 (M:64.5)	6		1	0	R.VVGNPFDSK.T		CID	347 - 355	ALDH2_HUMAN	Aldehyde dehydrogenase, mitochondrial OS=Homo sapiens GN=ALDH2 PE=1 SV=2
53		true	6683	817.3999	2449.1761	3	0.72	7.21	52.97	121.2 (M:121.2)	14		1	1	R.VVGNPFDSKTEQGPQVDETQFK.K		CID	347 - 368	ALDH2_HUMAN	Aldehyde dehydrogenase, mitochondrial OS=Homo sapiens GN=ALDH2 PE=1 SV=2
54		true	8279	831.4039	2491.1867	3	1.25	8.81	62.14	76.8 (M:76.8)	6		1	1	R.VVGNPFDSKTEQGPQVDETQFK.K	Acetyl: 9	CID	347 - 368	ALDH2_HUMAN	Aldehyde dehydrogenase, mitochondrial OS=Homo sapiens GN=ALDH2 PE=1 SV=2
55		true	5562	645.3269	2577.2711	4	2.80	195.40	46.51	37.1 (M:37.1)	1		1	2	R.VVGNPFDSKTEQGPQVDETQFKK.I		CID	347 - 369	ALDH2_HUMAN	Aldehyde dehydrogenase, mitochondrial OS=Homo sapiens GN=ALDH2 PE=1 SV=2
57		true	6935	655.8335	2619.2817	4	8.81	14.94	54.39	59.4 (M:59.4)	6		1	2	R.VVGNPFDSKTEQGPQVDETQFKK.I	Acetyl: 9	CID	347 - 369	ALDH2_HUMAN	Aldehyde dehydrogenase, mitochondrial OS=Homo sapiens GN=ALDH2 PE=1 SV=2
58		true	8420	667.8407	2667.3299	4	1.47	15.51	62.97	66.7 (M:66.7)	7	50.00	1	2	R.VVGNPFDSKTEQGPQVDETQFKK.I	Acetyl:2H(3): 9, 23	CID	347 - 369	ALDH2_HUMAN	Aldehyde dehydrogenase, mitochondrial OS=Homo sapiens GN=ALDH2 PE=1 SV=2
59		true	3871	753.8579	1505.6998	2	0.92	4.16	37.03	105.3 (M:105.3)	8		1	0	K.TEQGPQVDETQFK.K		CID	356 - 368	ALDH2_HUMAN	Aldehyde dehydrogenase, mitochondrial OS=Homo sapiens GN=ALDH2 PE=1 SV=2
60		true	2604	545.6071	1633.7948	3	2.87	7.05	30.09	106.2 (M:106.2)	5		1	1	K.TEQGPQVDETQFKK.I		CID	356 - 369	ALDH2_HUMAN	Aldehyde dehydrogenase, mitochondrial OS=Homo sapiens GN=ALDH2 PE=1 SV=2
61		true	4579	559.6103	1675.8053	3	2.26	4.75	40.93	60.1 (M:60.1)	3	50.00	1	1	K.TEQGPQVDETQFKK.I	Acetyl: 13	CID	356 - 369	ALDH2_HUMAN	Aldehyde dehydrogenase, mitochondrial OS=Homo sapiens GN=ALDH2 PE=1 SV=2
62		true	4568	560.6164	1678.8242	3	1.96	3.22	40.88	72.8 (M:72.8)	7	50.00	1	1	K.TEQGPQVDETQFKK.I	Acetyl:2H(3): 13	CID	356 - 369	ALDH2_HUMAN	Aldehyde dehydrogenase, mitochondrial OS=Homo sapiens GN=ALDH2 PE=1 SV=2
63		true	13025	893.4584	2677.3599	3	-2.41	83.27	90.62	39.5 (M:39.5)	1		1	2	K.TEQGPQVDETQFKKILGYINTGK.Q	Acetyl: 13, 14	CID	356 - 378	ALDH2_HUMAN	Aldehyde dehydrogenase, mitochondrial OS=Homo sapiens GN=ALDH2 PE=1 SV=2
65		true	12999	895.4766	2683.3976	3	3.90	41.43	90.47	63.4 (M:63.4)	6		1	2	K.TEQGPQVDETQFKKILGYINTGK.Q	Acetyl:2H(3): 13, 14	CID	356 - 378	ALDH2_HUMAN	Aldehyde dehydrogenase, mitochondrial OS=Homo sapiens GN=ALDH2 PE=1 SV=2
66		true	13022	809.1648	3232.6252	4	1.47	46.92	90.62	29.6 (M:29.6)	5	89.57	1	3	K.TEQGPQVDETQFKKILGYINTGKQEGAK.L	Acetyl: 13, 14, 23	CID	356 - 383	ALDH2_HUMAN	Aldehyde dehydrogenase, mitochondrial OS=Homo sapiens GN=ALDH2 PE=1 SV=2
68		true	12998	1081.5695	3241.6817	3	1.50	111.40	90.47	44.1 (M:44.1)	7	99.16	1	3	K.TEQGPQVDETQFKKILGYINTGKQEGAK.L	Acetyl:2H(3): 13, 14, 23	CID	356 - 383	ALDH2_HUMAN	Aldehyde dehydrogenase, mitochondrial OS=Homo sapiens GN=ALDH2 PE=1 SV=2
69		true	6347	574.8383	1147.6601	2	1.75	239.66	51.05	51.0 (M:51.0)	4		1	1	K.KILGYINTGK.Q	Acetyl: 1	CID	369 - 378	ALDH2_HUMAN	Aldehyde dehydrogenase, mitochondrial OS=Homo sapiens GN=ALDH2 PE=1 SV=2
70		true	6355	576.3478	1150.6789	2	1.81	5.45	51.06	46.7 (M:46.7)	4		1	1	K.KILGYINTGK.Q	Acetyl:2H(3): 1	CID	369 - 378	ALDH2_HUMAN	Aldehyde dehydrogenase, mitochondrial OS=Homo sapiens GN=ALDH2 PE=1 SV=2
71		true	4772	554.6466	1660.9148	3	1.86	63.55	42.05	23.0 (M:23.0)	1		1	2	K.KILGYINTGKQEGAK.L	Acetyl: 10	CID	369 - 383	ALDH2_HUMAN	Aldehyde dehydrogenase, mitochondrial OS=Homo sapiens GN=ALDH2 PE=1 SV=2
72		true	6921	568.6507	1702.9254	3	2.88	10.38	54.33	40.7 (M:40.7)	2	99.49	1	2	K.KILGYINTGKQEGAK.L	Acetyl: 1, 10	CID	369 - 383	ALDH2_HUMAN	Aldehyde dehydrogenase, mitochondrial OS=Homo sapiens GN=ALDH2 PE=1 SV=2
73		true	6905	855.4898	1708.9630	2	1.17	25.59	54.23	51.0 (M:51.0)	5	94.18	1	2	K.KILGYINTGKQEGAK.L	Acetyl:2H(3): 1, 10	CID	369 - 383	ALDH2_HUMAN	Aldehyde dehydrogenase, mitochondrial OS=Homo sapiens GN=ALDH2 PE=1 SV=2
74		true	11817	708.1348	2828.4855	4	8.65	13.48	83.10	23.1 (M:23.1)	1		1	3	K.KILGYINTGKQEGAKLLCGGGIAADR.G	Carbamidomethyl: 18; Acetyl: 1, 10, 15	CID	369 - 394	ALDH2_HUMAN	Aldehyde dehydrogenase, mitochondrial OS=Homo sapiens GN=ALDH2 PE=1 SV=2
75		true	11800	710.3944	2837.5420	4	2.27	10.77	83.00	40.8 (M:40.8)	2		1	3	K.KILGYINTGKQEGAKLLCGGGIAADR.G	Carbamidomethyl: 18; Acetyl:2H(3): 1, 10, 15	CID	369 - 394	ALDH2_HUMAN	Aldehyde dehydrogenase, mitochondrial OS=Homo sapiens GN=ALDH2 PE=1 SV=2
76		true	10117	931.8463	2792.5126	3	1.59	20.54	72.95	38.7 (M:38.7)	3	46.55	1	3	K.KILGYINTGKQEGAKLLCGGGIAADR.G	Carbamidomethyl: 18; Acetyl:2H(3): 10, 15	CID	369 - 394	ALDH2_HUMAN	Aldehyde dehydrogenase, mitochondrial OS=Homo sapiens GN=ALDH2 PE=1 SV=2
77		true	5028	489.7850	977.5546	2	0.94	5.91	43.47	66.8 (M:66.8)	4		1	0	K.ILGYINTGK.Q		CID	370 - 378	ALDH2_HUMAN	Aldehyde dehydrogenase, mitochondrial OS=Homo sapiens GN=ALDH2 PE=1 SV=2
78		true	3610	497.9449	1490.8093	3	2.44	28.70	35.69	98.2 (M:98.2)	5		1	1	K.ILGYINTGKQEGAK.L		CID	370 - 383	ALDH2_HUMAN	Aldehyde dehydrogenase, mitochondrial OS=Homo sapiens GN=ALDH2 PE=1 SV=2
79		true	5807	767.4180	1532.8199	2	1.07	19.68	47.90	77.2 (M:77.2)	3	99.98	1	1	K.ILGYINTGKQEGAK.L	Acetyl: 9	CID	370 - 383	ALDH2_HUMAN	Aldehyde dehydrogenase, mitochondrial OS=Homo sapiens GN=ALDH2 PE=1 SV=2
81		true	5775	768.9274	1535.8387	2	1.05	6.70	47.74	71.3 (M:71.3)	8	99.91	1	1	K.ILGYINTGKQEGAK.L	Acetyl:2H(3): 9	CID	370 - 383	ALDH2_HUMAN	Aldehyde dehydrogenase, mitochondrial OS=Homo sapiens GN=ALDH2 PE=1 SV=2
83		true	11076	887.1351	2658.3799	3	1.28	9.85	78.61	88.4 (M:88.4)	13		1	2	K.ILGYINTGKQEGAKLLCGGGIAADR.G	Carbamidomethyl: 17; Acetyl: 9, 14	CID	370 - 394	ALDH2_HUMAN	Aldehyde dehydrogenase, mitochondrial OS=Homo sapiens GN=ALDH2 PE=1 SV=2
84		true	11062	889.1473	2664.4176	3	0.96	19.88	78.52	58.6 (M:58.6)	5		1	2	K.ILGYINTGKQEGAKLLCGGGIAADR.G	Carbamidomethyl: 17; Acetyl:2H(3): 9, 14	CID	370 - 394	ALDH2_HUMAN	Aldehyde dehydrogenase, mitochondrial OS=Homo sapiens GN=ALDH2 PE=1 SV=2
85		true	6474	829.4207	1656.8254	2	0.86	9.90	51.75	81.6 (M:81.6)	9		1	1	K.QEGAKLLCGGGIAADR.G	Carbamidomethyl: 8; Acetyl: 5	CID	379 - 394	ALDH2_HUMAN	Aldehyde dehydrogenase, mitochondrial OS=Homo sapiens GN=ALDH2 PE=1 SV=2
86		true	6455	830.9290	1659.8442	2	-0.41	4.61	51.65	72.7 (M:72.7)	7		1	1	K.QEGAKLLCGGGIAADR.G	Carbamidomethyl: 8; Acetyl:2H(3): 5	CID	379 - 394	ALDH2_HUMAN	Aldehyde dehydrogenase, mitochondrial OS=Homo sapiens GN=ALDH2 PE=1 SV=2
87		true	3833	551.7885	1101.5601	2	2.22	2.75	36.87	76.1 (M:76.1)	4		1	0	K.LLCGGGIAADR.G	Carbamidomethyl: 3	CID	384 - 394	ALDH2_HUMAN	Aldehyde dehydrogenase, mitochondrial OS=Homo sapiens GN=ALDH2 PE=1 SV=2
88		true	11693	1094.0443	2186.0718	2	1.07	65.35	82.33	52.9 (M:52.9)	4		1	0	R.GYFIQPTVFGDVQDGMTIAK.E		CID	395 - 414	ALDH2_HUMAN	Aldehyde dehydrogenase, mitochondrial OS=Homo sapiens GN=ALDH2 PE=1 SV=2
89		true	12188	702.3843	1402.7530	2	0.77	106.04	85.38	64.3 (M:64.3)	14		1	0	K.EEIFGPVMQILK.F		CID	415 - 426	ALDH2_HUMAN	Aldehyde dehydrogenase, mitochondrial OS=Homo sapiens GN=ALDH2 PE=1 SV=2
90		true	5230	393.2243	1176.6503	3	0.73	8.69	44.59	58.7 (M:58.7)	4		1	1	K.FKTIEEVVGR.A		CID	427 - 436	ALDH2_HUMAN	Aldehyde dehydrogenase, mitochondrial OS=Homo sapiens GN=ALDH2 PE=1 SV=2
91		true	7787	610.3383	1218.6608	2	0.97	12.82	59.37	73.1 (M:73.1)	6		1	1	K.FKTIEEVVGR.A	Acetyl: 2	CID	427 - 436	ALDH2_HUMAN	Aldehyde dehydrogenase, mitochondrial OS=Homo sapiens GN=ALDH2 PE=1 SV=2
92		true	7779	611.8479	1221.6797	2	1.21	8.24	59.33	68.5 (M:68.5)	5		1	1	K.FKTIEEVVGR.A	Acetyl:2H(3): 2	CID	427 - 436	ALDH2_HUMAN	Aldehyde dehydrogenase, mitochondrial OS=Homo sapiens GN=ALDH2 PE=1 SV=2
93		true	3225	451.7513	901.4869	2	1.21	112.70	33.55	54.8 (M:54.8)	6		1	0	K.TIEEVVGR.A		CID	429 - 436	ALDH2_HUMAN	Aldehyde dehydrogenase, mitochondrial OS=Homo sapiens GN=ALDH2 PE=1 SV=2
94		true	8542	764.3943	1526.7729	2	0.71	7.44	63.73	125.8 (M:125.8)	33		1	0	R.ANNSTYGLAAAVFTK.D		CID	437 - 451	ALDH2_HUMAN	Aldehyde dehydrogenase, mitochondrial OS=Homo sapiens GN=ALDH2 PE=1 SV=2
95		true	11177	681.3492	2040.0164	3	493.80	17.10	79.17	64.7 (M:64.7)	3	99.81	1	1	R.ANNSTYGLAAAVFTKDLDK.A	Acetyl: 15	CID	437 - 455	ALDH2_HUMAN	Aldehyde dehydrogenase, mitochondrial OS=Homo sapiens GN=ALDH2 PE=1 SV=2
96		true	11168	682.0218	2043.0352	3	4.08	89.35	79.12	22.6 (M:22.6)	1	71.10	1	1	R.ANNSTYGLAAAVFTKDLDK.A	Acetyl:2H(3): 15	CID	437 - 455	ALDH2_HUMAN	Aldehyde dehydrogenase, mitochondrial OS=Homo sapiens GN=ALDH2 PE=1 SV=2
97		true	7957	800.3999	1598.7828	2	1.58	4.30	60.30	107.2 (M:107.2)	14		1	0	R.ELGEYGLQAYTEVK.T		CID	493 - 506	ALDH2_HUMAN	Aldehyde dehydrogenase, mitochondrial OS=Homo sapiens GN=ALDH2 PE=1 SV=2
98		true	10696	724.0522	2169.1205	3	6.62	14.93	76.27	23.0 (M:23.0)	1	79.33	1	1	R.ELGEYGLQAYTEVKTVTVK.V	Acetyl: 14	CID	493 - 511	ALDH2_HUMAN	Aldehyde dehydrogenase, mitochondrial OS=Homo sapiens GN=ALDH2 PE=1 SV=2
99		true	1681	333.8789	998.6124	3	2.38	489.38	25.11	22.0 (M:22.0)	2		1	1	K.TVTVKVPQK.N		CID	507 - 515	ALDH2_HUMAN	Aldehyde dehydrogenase, mitochondrial OS=Homo sapiens GN=ALDH2 PE=1 SV=2
100		true	3391	521.3191	1040.6230	2	0.68	10.40	34.47	45.7 (M:45.7)	4		1	1	K.TVTVKVPQK.N	Acetyl: 5	CID	507 - 515	ALDH2_HUMAN	Aldehyde dehydrogenase, mitochondrial OS=Homo sapiens GN=ALDH2 PE=1 SV=2
101		true	3348	522.8287	1043.6418	2	0.92	282.20	34.25	54.4 (M:54.4)	6	99.89	1	1	K.TVTVKVPQK.N	Acetyl:2H(3): 5	CID	507 - 515	ALDH2_HUMAN	Aldehyde dehydrogenase, mitochondrial OS=Homo sapiens GN=ALDH2 PE=1 SV=2
102		true	3098	623.3665	1244.7168	2	1.27	268.99	32.85	24.4 (M:24.4)	1		1	2	K.TVTVKVPQKNS.-	Acetyl:2H(3): 5	CID	507 - 517	ALDH2_HUMAN	Aldehyde dehydrogenase, mitochondrial OS=Homo sapiens GN=ALDH2 PE=1 SV=2

## Sheet: Sample 3
Row	User Flag	OK	Cmpd.	m/z meas.	m/z calc.	Mr calc.	z	Δ m/z [ppm]	RMS90 [ppm]	Rt [min]	Scores	#Cmpds.	Site [%]	Rank	P	Sequence	Modifications	Type	Range	Accession	Protein
1		true	7330	741.6142	741.6130	2962.4230	4	1.59	5.05	56.63	152.7 (M:152.7)	11		1	2	R.KTFPTVNPSTGEVICQVAEGDKEDVDK.A	Carbamidomethyl: 15	CID	52 - 78	ALDH2_HUMAN	Aldehyde dehydrogenase, mitochondrial OS=Homo sapiens GN=ALDH2 PE=1 SV=2
2		true	8693	752.8713	752.8704	3007.4524	4	1.19	9.27	64.46	52.6 (M:52.6)	1	99.60	1	2	R.KTFPTVNPSTGEVICQVAEGDKEDVDK.A	Carbamidomethyl: 15; Acetyl:2H(3): 22	CID	52 - 78	ALDH2_HUMAN	Aldehyde dehydrogenase, mitochondrial OS=Homo sapiens GN=ALDH2 PE=1 SV=2
3		true	8703	1002.4862	1002.4851	3004.4335	3	1.09	6.65	64.54	87.2 (M:87.2)	10	99.99	1	2	R.KTFPTVNPSTGEVICQVAEGDKEDVDK.A	Carbamidomethyl: 15; Acetyl: 22	CID	52 - 78	ALDH2_HUMAN	Aldehyde dehydrogenase, mitochondrial OS=Homo sapiens GN=ALDH2 PE=1 SV=2
4		true	8967	1002.4881	1002.4851	3004.4335	3	2.98	7.94	66.01	146.2 (M:146.2)	1		1	2	R.KTFPTVNPSTGEVICQVAEGDKEDVDK.A	Carbamidomethyl: 15; Acetyl: 1	CID	52 - 78	ALDH2_HUMAN	Aldehyde dehydrogenase, mitochondrial OS=Homo sapiens GN=ALDH2 PE=1 SV=2
5		true	8960	1003.4924	1003.4914	3007.4524	3	0.95	8.47	65.94	99.5 (M:99.5)	1		1	2	R.KTFPTVNPSTGEVICQVAEGDKEDVDK.A	Carbamidomethyl: 15; Acetyl:2H(3): 1	CID	52 - 78	ALDH2_HUMAN	Aldehyde dehydrogenase, mitochondrial OS=Homo sapiens GN=ALDH2 PE=1 SV=2
6		true	10357	1018.5036	1018.5012	3052.4818	3	2.32	9.89	74.10	84.6 (M:84.6)	5	99.86	1	2	R.KTFPTVNPSTGEVICQVAEGDKEDVDK.A	Carbamidomethyl: 15; Acetyl:2H(3): 1, 22	CID	52 - 78	ALDH2_HUMAN	Aldehyde dehydrogenase, mitochondrial OS=Homo sapiens GN=ALDH2 PE=1 SV=2
7		true	7637	653.1337	653.1320	3260.6235	5	2.69	11.87	58.48	140.3 (M:140.3)	1		1	3	R.KTFPTVNPSTGEVICQVAEGDKEDVDKAVK.A	Carbamidomethyl: 15	CID	52 - 81	ALDH2_HUMAN	Aldehyde dehydrogenase, mitochondrial OS=Homo sapiens GN=ALDH2 PE=1 SV=2
8		true	8377	826.6661	826.6658	3302.6340	4	0.37	10.65	62.57	51.5 (M:51.5)	10	49.07	1	3	R.KTFPTVNPSTGEVICQVAEGDKEDVDKAVK.A	Carbamidomethyl: 15; Acetyl: 27	CID	52 - 81	ALDH2_HUMAN	Aldehyde dehydrogenase, mitochondrial OS=Homo sapiens GN=ALDH2 PE=1 SV=2
9		true	9770	837.1686	837.1684	3344.6446	4	0.23	16.79	70.68	17.7 (M:17.7)	1	50.00	1	3	R.KTFPTVNPSTGEVICQVAEGDKEDVDKAVK.A	Carbamidomethyl: 15; Acetyl: 1, 27	CID	52 - 81	ALDH2_HUMAN	Aldehyde dehydrogenase, mitochondrial OS=Homo sapiens GN=ALDH2 PE=1 SV=2
11		true	10007	837.9235	837.9231	3347.6634	4	0.41	17.08	72.12	20.4 (M:20.4)	5	44.94	1	3	R.KTFPTVNPSTGEVICQVAEGDKEDVDKAVK.A	Carbamidomethyl: 15; Acetyl: 22; Acetyl:2H(3): 27	CID	52 - 81	ALDH2_HUMAN	Aldehyde dehydrogenase, mitochondrial OS=Homo sapiens GN=ALDH2 PE=1 SV=2
12		true	9729	838.6793	838.6778	3350.6823	4	1.73	9.80	70.46	29.9 (M:29.9)	5	46.34	1	3	R.KTFPTVNPSTGEVICQVAEGDKEDVDKAVK.A	Carbamidomethyl: 15; Acetyl:2H(3): 1, 30	CID	52 - 81	ALDH2_HUMAN	Aldehyde dehydrogenase, mitochondrial OS=Homo sapiens GN=ALDH2 PE=1 SV=2
13		true	9718	838.6796	838.6778	3350.6823	4	2.07	13.65	70.41	26.5 (M:26.5)	5	33.33	1	3	R.KTFPTVNPSTGEVICQVAEGDKEDVDKAVK.A	Carbamidomethyl: 15; Acetyl:2H(3): 1, 22	CID	52 - 81	ALDH2_HUMAN	Aldehyde dehydrogenase, mitochondrial OS=Homo sapiens GN=ALDH2 PE=1 SV=2
14		true	10023	1115.8914	1115.8888	3344.6446	3	2.35	17.59	72.23	51.9 (M:51.9)	3	85.29	1	3	R.KTFPTVNPSTGEVICQVAEGDKEDVDKAVK.A	Carbamidomethyl: 15; Acetyl: 22, 27	CID	52 - 81	ALDH2_HUMAN	Aldehyde dehydrogenase, mitochondrial OS=Homo sapiens GN=ALDH2 PE=1 SV=2
15		true	9996	1116.8946	1116.8951	3347.6634	3	-0.46	10.28	72.07	29.1 (M:29.1)	5	71.04	1	3	R.KTFPTVNPSTGEVICQVAEGDKEDVDKAVK.A	Carbamidomethyl: 15; Acetyl: 27; Acetyl:2H(3): 22	CID	52 - 81	ALDH2_HUMAN	Aldehyde dehydrogenase, mitochondrial OS=Homo sapiens GN=ALDH2 PE=1 SV=2
16		true	9986	1117.9032	1117.9014	3350.6823	3	1.62	9.51	72.02	64.6 (M:64.6)	5	89.26	1	3	R.KTFPTVNPSTGEVICQVAEGDKEDVDKAVK.A	Carbamidomethyl: 15; Acetyl:2H(3): 22, 27	CID	52 - 81	ALDH2_HUMAN	Aldehyde dehydrogenase, mitochondrial OS=Homo sapiens GN=ALDH2 PE=1 SV=2
18		true	11495	1132.9161	1132.9112	3395.7117	3	4.35	12.75	80.87	55.1 (M:55.1)	3	50.00	1	3	R.KTFPTVNPSTGEVICQVAEGDKEDVDKAVK.A	Carbamidomethyl: 15; Acetyl:2H(3): 1, 22, 30	CID	52 - 81	ALDH2_HUMAN	Aldehyde dehydrogenase, mitochondrial OS=Homo sapiens GN=ALDH2 PE=1 SV=2
19		true	8677	945.7837	945.7833	2834.3280	3	0.43	7.01	64.39	152.7 (M:152.7)	4		1	1	K.TFPTVNPSTGEVICQVAEGDKEDVDK.A	Carbamidomethyl: 14	CID	53 - 78	ALDH2_HUMAN	Aldehyde dehydrogenase, mitochondrial OS=Homo sapiens GN=ALDH2 PE=1 SV=2
20		true	10163	959.7881	959.7868	2876.3386	3	1.33	7.87	73.02	71.9 (M:71.9)	2	99.96	1	1	K.TFPTVNPSTGEVICQVAEGDKEDVDK.A	Carbamidomethyl: 14; Acetyl: 21	CID	53 - 78	ALDH2_HUMAN	Aldehyde dehydrogenase, mitochondrial OS=Homo sapiens GN=ALDH2 PE=1 SV=2
21		true	8764	784.1396	784.1394	3132.5285	4	0.25	10.37	64.90	62.6 (M:62.6)	4		1	2	K.TFPTVNPSTGEVICQVAEGDKEDVDKAVK.A	Carbamidomethyl: 14	CID	53 - 81	ALDH2_HUMAN	Aldehyde dehydrogenase, mitochondrial OS=Homo sapiens GN=ALDH2 PE=1 SV=2
22		true	9530	1059.1877	1059.1870	3174.5391	3	0.68	8.33	69.31	38.1 (M:38.1)	5	49.14	1	2	K.TFPTVNPSTGEVICQVAEGDKEDVDKAVK.A	Carbamidomethyl: 14; Acetyl: 26	CID	53 - 81	ALDH2_HUMAN	Aldehyde dehydrogenase, mitochondrial OS=Homo sapiens GN=ALDH2 PE=1 SV=2
23		true	11379	1075.2052	1075.2030	3222.5873	3	2.03	9.53	80.15	21.1 (M:21.1)	1	50.00	1	2	K.TFPTVNPSTGEVICQVAEGDKEDVDKAVK.A	Carbamidomethyl: 14; Acetyl:2H(3): 21, 29	CID	53 - 81	ALDH2_HUMAN	Aldehyde dehydrogenase, mitochondrial OS=Homo sapiens GN=ALDH2 PE=1 SV=2
24		true	10060	869.1874	869.1859	3472.7144	4	1.76	9.12	72.46	61.1 (M:61.1)	4	99.78	1	3	K.TFPTVNPSTGEVICQVAEGDKEDVDKAVKAAR.A	Carbamidomethyl: 14; Acetyl: 29	CID	53 - 84	ALDH2_HUMAN	Aldehyde dehydrogenase, mitochondrial OS=Homo sapiens GN=ALDH2 PE=1 SV=2
25		true	10864	879.6898	879.6885	3514.7250	4	1.48	7.62	76.90	90.1 (M:90.1)	3	100.00	1	3	K.TFPTVNPSTGEVICQVAEGDKEDVDKAVKAAR.A	Carbamidomethyl: 14; Acetyl: 26, 29	CID	53 - 84	ALDH2_HUMAN	Aldehyde dehydrogenase, mitochondrial OS=Homo sapiens GN=ALDH2 PE=1 SV=2
26		true	10838	881.1979	881.1979	3520.7626	4	-0.05	9.45	76.79	21.2 (M:21.2)	1		1	3	K.TFPTVNPSTGEVICQVAEGDKEDVDKAVKAAR.A	Carbamidomethyl: 14; Acetyl:2H(3): 26, 29	CID	53 - 84	ALDH2_HUMAN	Aldehyde dehydrogenase, mitochondrial OS=Homo sapiens GN=ALDH2 PE=1 SV=2
27		true	12868	892.4552	892.4553	3565.7920	4	-0.07	12.45	89.32	38.7 (M:38.7)	1		1	3	K.TFPTVNPSTGEVICQVAEGDKEDVDKAVKAAR.A	Carbamidomethyl: 14; Acetyl:2H(3): 21, 26, 29	CID	53 - 84	ALDH2_HUMAN	Aldehyde dehydrogenase, mitochondrial OS=Homo sapiens GN=ALDH2 PE=1 SV=2
28		true	8226	566.7993	566.7985	1131.5825	2	1.38	2.95	61.79	66.9 (M:66.9)	3		1	0	R.AAFQLGSPWR.R		CID	85 - 94	ALDH2_HUMAN	Aldehyde dehydrogenase, mitochondrial OS=Homo sapiens GN=ALDH2 PE=1 SV=2
29		true	4489	415.2427	415.2425	828.4705	2	0.37	10.70	40.38	13.8 (M:13.8)	2		1	0	R.LADLIER.D		CID	108 - 114	ALDH2_HUMAN	Aldehyde dehydrogenase, mitochondrial OS=Homo sapiens GN=ALDH2 PE=1 SV=2
30		true	3317	367.5393	367.5401	1099.5986	3	-2.16	22.16	34.02	35.1 (M:35.1)	3		1	1	R.LADLIERDR.T		CID	108 - 116	ALDH2_HUMAN	Aldehyde dehydrogenase, mitochondrial OS=Homo sapiens GN=ALDH2 PE=1 SV=2
31		true	4003	487.2248	487.2243	972.4341	2	0.90	3.81	37.66	68.5 (M:68.5)	3		1	0	R.YYAGWADK.Y		CID	148 - 155	ALDH2_HUMAN	Aldehyde dehydrogenase, mitochondrial OS=Homo sapiens GN=ALDH2 PE=1 SV=2
32		true	3007	365.4255	365.4255	1457.6728	4	0.17	3.95	32.24	61.9 (M:61.9)	7		1	1	R.YYAGWADKYHGK.T		CID	148 - 159	ALDH2_HUMAN	Aldehyde dehydrogenase, mitochondrial OS=Homo sapiens GN=ALDH2 PE=1 SV=2
33		true	5166	501.9087	501.9080	1502.7022	3	1.42	9.33	44.15	74.2 (M:74.2)	2	99.95	1	1	R.YYAGWADKYHGK.T	Acetyl:2H(3): 8	CID	148 - 159	ALDH2_HUMAN	Aldehyde dehydrogenase, mitochondrial OS=Homo sapiens GN=ALDH2 PE=1 SV=2
34		true	10451	754.1099	754.1093	3012.4083	4	0.70	8.20	74.65	49.7 (M:49.7)	5	87.78	1	2	R.YYAGWADKYHGKTIPIDGDFFSYTR.H	Acetyl: 12	CID	148 - 172	ALDH2_HUMAN	Aldehyde dehydrogenase, mitochondrial OS=Homo sapiens GN=ALDH2 PE=1 SV=2
35		true	11827	766.1198	766.1214	3060.4565	4	-2.11	5.22	82.88	31.5 (M:31.5)	1		1	2	R.YYAGWADKYHGKTIPIDGDFFSYTR.H	Acetyl:2H(3): 8, 12	CID	148 - 172	ALDH2_HUMAN	Aldehyde dehydrogenase, mitochondrial OS=Homo sapiens GN=ALDH2 PE=1 SV=2
36		true	9694	687.0034	687.0022	2057.9847	3	1.73	9.24	70.26	111.6 (M:111.6)	7		1	1	K.YHGKTIPIDGDFFSYTR.H	Acetyl: 4	CID	156 - 172	ALDH2_HUMAN	Aldehyde dehydrogenase, mitochondrial OS=Homo sapiens GN=ALDH2 PE=1 SV=2
37		true	9649	688.0063	688.0085	2061.0035	3	-3.13	7.10	70.02	93.3 (M:93.3)	2		1	1	K.YHGKTIPIDGDFFSYTR.H	Acetyl:2H(3): 4	CID	156 - 172	ALDH2_HUMAN	Aldehyde dehydrogenase, mitochondrial OS=Homo sapiens GN=ALDH2 PE=1 SV=2
38		true	10293	766.3749	766.3750	1530.7355	2	-0.18	3.78	73.76	119.6 (M:119.6)	13		1	0	K.TIPIDGDFFSYTR.H		CID	160 - 172	ALDH2_HUMAN	Aldehyde dehydrogenase, mitochondrial OS=Homo sapiens GN=ALDH2 PE=1 SV=2
39		true	7679	685.3972	685.3972	1368.7799	2	-0.09	6.12	58.73	125.5 (M:125.5)	4		1	0	K.LGPALATGNVVVMK.V		CID	196 - 209	ALDH2_HUMAN	Aldehyde dehydrogenase, mitochondrial OS=Homo sapiens GN=ALDH2 PE=1 SV=2
40		true	12608	922.5301	922.5300	1843.0455	2	0.08	11.47	87.67	101.9 (M:101.9)	12		1	0	K.VAEQTPLTALYVANLIK.E		CID	210 - 226	ALDH2_HUMAN	Aldehyde dehydrogenase, mitochondrial OS=Homo sapiens GN=ALDH2 PE=1 SV=2
41		true	11429	1007.1791	1007.1768	3018.5087	3	2.26	14.63	80.44	20.4 (M:20.4)	1		1	0	K.EAGFPPGVVNIVPGFGPTAGAAIASHEDVDK.V		CID	227 - 257	ALDH2_HUMAN	Aldehyde dehydrogenase, mitochondrial OS=Homo sapiens GN=ALDH2 PE=1 SV=2
43		true	4599	569.2986	569.2986	1136.5826	2	-0.04	6.83	41.00	123.7 (M:123.7)	3		1	0	K.VAFTGSTEIGR.V		CID	258 - 268	ALDH2_HUMAN	Aldehyde dehydrogenase, mitochondrial OS=Homo sapiens GN=ALDH2 PE=1 SV=2
44		true	3660	593.8438	593.8431	1185.6717	2	1.07	6.77	35.83	95.5 (M:95.5)	5		1	0	R.VIQVAAGSSNLK.R		CID	269 - 280	ALDH2_HUMAN	Aldehyde dehydrogenase, mitochondrial OS=Homo sapiens GN=ALDH2 PE=1 SV=2
45		true	2492	448.2651	448.2649	1341.7728	3	0.51	12.44	29.55	152.7 (M:152.7)	8		1	1	R.VIQVAAGSSNLKR.V		CID	269 - 281	ALDH2_HUMAN	Aldehyde dehydrogenase, mitochondrial OS=Homo sapiens GN=ALDH2 PE=1 SV=2
46		true	4647	463.2746	463.2747	1386.8022	3	-0.15	5.40	41.25	128.1 (M:128.1)	8		1	1	R.VIQVAAGSSNLKR.V	Acetyl:2H(3): 12	CID	269 - 281	ALDH2_HUMAN	Aldehyde dehydrogenase, mitochondrial OS=Homo sapiens GN=ALDH2 PE=1 SV=2
47		true	4654	692.8998	692.8990	1383.7834	2	1.18	8.83	41.30	80.9 (M:80.9)	3		1	1	R.VIQVAAGSSNLKR.V	Acetyl: 12	CID	269 - 281	ALDH2_HUMAN	Aldehyde dehydrogenase, mitochondrial OS=Homo sapiens GN=ALDH2 PE=1 SV=2
48		true	4324	408.7447	408.7449	815.4753	2	-0.64	2.37	39.35	27.8 (M:27.8)	5		1	0	R.VTLELGGK.S		CID	282 - 289	ALDH2_HUMAN	Aldehyde dehydrogenase, mitochondrial OS=Homo sapiens GN=ALDH2 PE=1 SV=2
49		true	10513	895.4183	895.4176	1788.8206	2	0.82	3.47	74.99	152.7 (M:152.7)	22		1	0	R.TFVQEDIYDEFVER.S		CID	325 - 338	ALDH2_HUMAN	Aldehyde dehydrogenase, mitochondrial OS=Homo sapiens GN=ALDH2 PE=1 SV=2
50		true	3281	402.5473	402.5473	1204.6200	3	0.05	6.47	33.82	15.1 (M:15.1)	1		1	1	K.SRVVGNPFDSK.T		CID	345 - 355	ALDH2_HUMAN	Aldehyde dehydrogenase, mitochondrial OS=Homo sapiens GN=ALDH2 PE=1 SV=2
51		true	4322	481.7509	481.7507	961.4869	2	0.34	6.87	39.35	93.5 (M:93.5)	5		1	0	R.VVGNPFDSK.T		CID	347 - 355	ALDH2_HUMAN	Aldehyde dehydrogenase, mitochondrial OS=Homo sapiens GN=ALDH2 PE=1 SV=2
53		true	6684	817.3999	817.3993	2449.1761	3	0.68	4.73	52.86	152.7 (M:152.7)	8		1	1	R.VVGNPFDSKTEQGPQVDETQFK.K		CID	347 - 368	ALDH2_HUMAN	Aldehyde dehydrogenase, mitochondrial OS=Homo sapiens GN=ALDH2 PE=1 SV=2
54		true	8283	831.4035	831.4028	2491.1867	3	0.80	7.54	62.09	130.5 (M:130.5)	6		1	1	R.VVGNPFDSKTEQGPQVDETQFK.K	Acetyl: 9	CID	347 - 368	ALDH2_HUMAN	Aldehyde dehydrogenase, mitochondrial OS=Homo sapiens GN=ALDH2 PE=1 SV=2
55		true	8220	832.4086	832.4091	2494.2055	3	-0.62	7.96	61.74	21.5 (M:21.5)	1		1	1	R.VVGNPFDSKTEQGPQVDETQFK.K	Acetyl:2H(3): 9	CID	347 - 368	ALDH2_HUMAN	Aldehyde dehydrogenase, mitochondrial OS=Homo sapiens GN=ALDH2 PE=1 SV=2
56		true	5580	645.3264	645.3251	2577.2711	4	2.12	12.97	46.48	68.2 (M:68.2)	1		1	2	R.VVGNPFDSKTEQGPQVDETQFKK.I		CID	347 - 369	ALDH2_HUMAN	Aldehyde dehydrogenase, mitochondrial OS=Homo sapiens GN=ALDH2 PE=1 SV=2
57		true	6950	655.8287	655.8277	2619.2817	4	1.57	12.45	54.41	25.8 (M:25.8)	4	49.22	1	2	R.VVGNPFDSKTEQGPQVDETQFKK.I	Acetyl: 23	CID	347 - 369	ALDH2_HUMAN	Aldehyde dehydrogenase, mitochondrial OS=Homo sapiens GN=ALDH2 PE=1 SV=2
58		true	6918	655.8297	655.8277	2619.2817	4	3.11	5.99	54.24	152.7 (M:152.7)	7		1	2	R.VVGNPFDSKTEQGPQVDETQFKK.I	Acetyl: 9	CID	347 - 369	ALDH2_HUMAN	Aldehyde dehydrogenase, mitochondrial OS=Homo sapiens GN=ALDH2 PE=1 SV=2
59		true	8438	667.8403	667.8397	2667.3299	4	0.86	6.03	62.97	119.2 (M:119.2)	7	50.00	1	2	R.VVGNPFDSKTEQGPQVDETQFKK.I	Acetyl:2H(3): 9, 23	CID	347 - 369	ALDH2_HUMAN	Aldehyde dehydrogenase, mitochondrial OS=Homo sapiens GN=ALDH2 PE=1 SV=2
60		true	3855	753.8582	753.8572	1505.6998	2	1.32	4.93	36.85	152.7 (M:152.7)	11		1	0	K.TEQGPQVDETQFK.K		CID	356 - 368	ALDH2_HUMAN	Aldehyde dehydrogenase, mitochondrial OS=Homo sapiens GN=ALDH2 PE=1 SV=2
61		true	2549	545.6060	545.6055	1633.7948	3	0.77	7.36	29.86	152.7 (M:152.7)	5		1	1	K.TEQGPQVDETQFKK.I		CID	356 - 369	ALDH2_HUMAN	Aldehyde dehydrogenase, mitochondrial OS=Homo sapiens GN=ALDH2 PE=1 SV=2
62		true	4612	838.9095	838.9099	1675.8053	2	-0.55	18.09	41.05	13.7 (M:13.7)	1	50.00	1	1	K.TEQGPQVDETQFKK.I	Acetyl: 13	CID	356 - 369	ALDH2_HUMAN	Aldehyde dehydrogenase, mitochondrial OS=Homo sapiens GN=ALDH2 PE=1 SV=2
63		true	4570	840.4190	840.4194	1678.8242	2	-0.46	12.28	40.84	130.2 (M:130.2)	9	50.00	1	1	K.TEQGPQVDETQFKK.I	Acetyl:2H(3): 13	CID	356 - 369	ALDH2_HUMAN	Aldehyde dehydrogenase, mitochondrial OS=Homo sapiens GN=ALDH2 PE=1 SV=2
64		true	13087	893.4547	893.4606	2677.3599	3	-6.60	10.31	90.73	25.4 (M:25.4)	1		1	2	K.TEQGPQVDETQFKKILGYINTGK.Q	Acetyl: 13, 14	CID	356 - 378	ALDH2_HUMAN	Aldehyde dehydrogenase, mitochondrial OS=Homo sapiens GN=ALDH2 PE=1 SV=2
65		true	13052	895.4720	895.4731	2683.3976	3	-1.29	7.03	90.52	107.3 (M:107.3)	8	100.00	1	2	K.TEQGPQVDETQFKKILGYINTGK.Q	Acetyl:2H(3): 13, 14	CID	356 - 378	ALDH2_HUMAN	Aldehyde dehydrogenase, mitochondrial OS=Homo sapiens GN=ALDH2 PE=1 SV=2
68		true	11671	800.1696	800.1703	3196.6523	4	-0.90	9.57	81.92	24.1 (M:24.1)	1	81.26	1	3	K.TEQGPQVDETQFKKILGYINTGKQEGAK.L	Acetyl:2H(3): 13, 14	CID	356 - 383	ALDH2_HUMAN	Aldehyde dehydrogenase, mitochondrial OS=Homo sapiens GN=ALDH2 PE=1 SV=2
69		true	13068	809.1644	809.1636	3232.6252	4	1.03	11.18	90.62	59.4 (M:59.4)	5	99.73	1	3	K.TEQGPQVDETQFKKILGYINTGKQEGAK.L	Acetyl: 13, 14, 23	CID	356 - 383	ALDH2_HUMAN	Aldehyde dehydrogenase, mitochondrial OS=Homo sapiens GN=ALDH2 PE=1 SV=2
70		true	13066	811.4278	811.4277	3241.6817	4	0.10	11.21	90.59	93.8 (M:93.8)	7	99.99	1	3	K.TEQGPQVDETQFKKILGYINTGKQEGAK.L	Acetyl:2H(3): 13, 14, 23	CID	356 - 383	ALDH2_HUMAN	Aldehyde dehydrogenase, mitochondrial OS=Homo sapiens GN=ALDH2 PE=1 SV=2
71		true	6369	574.8377	574.8373	1147.6601	2	0.59	8.65	51.04	62.0 (M:62.0)	2		1	1	K.KILGYINTGK.Q	Acetyl: 1	CID	369 - 378	ALDH2_HUMAN	Aldehyde dehydrogenase, mitochondrial OS=Homo sapiens GN=ALDH2 PE=1 SV=2
72		true	6382	576.3472	576.3467	1150.6789	2	0.75	6.45	51.10	69.6 (M:69.6)	3		1	1	K.KILGYINTGK.Q	Acetyl:2H(3): 1	CID	369 - 378	ALDH2_HUMAN	Aldehyde dehydrogenase, mitochondrial OS=Homo sapiens GN=ALDH2 PE=1 SV=2
73		true	2714	405.7331	405.7333	1618.9043	4	-0.67	8.72	30.69	17.4 (M:17.4)	1		1	2	K.KILGYINTGKQEGAK.L		CID	369 - 383	ALDH2_HUMAN	Aldehyde dehydrogenase, mitochondrial OS=Homo sapiens GN=ALDH2 PE=1 SV=2
74		true	4794	554.6457	554.6456	1660.9148	3	0.23	9.51	42.07	15.7 (M:15.7)	1		1	2	K.KILGYINTGKQEGAK.L	Acetyl: 10	CID	369 - 383	ALDH2_HUMAN	Aldehyde dehydrogenase, mitochondrial OS=Homo sapiens GN=ALDH2 PE=1 SV=2
75		true	4768	555.6513	555.6518	1663.9337	3	-0.95	6.21	41.92	43.3 (M:43.3)	1	99.69	1	2	K.KILGYINTGKQEGAK.L	Acetyl:2H(3): 10	CID	369 - 383	ALDH2_HUMAN	Aldehyde dehydrogenase, mitochondrial OS=Homo sapiens GN=ALDH2 PE=1 SV=2
77		true	6896	568.6510	568.6491	1702.9254	3	3.37	17.88	54.10	26.2 (M:26.2)	3		1	2	K.KILGYINTGKQEGAK.L	Acetyl: 1, 10	CID	369 - 383	ALDH2_HUMAN	Aldehyde dehydrogenase, mitochondrial OS=Homo sapiens GN=ALDH2 PE=1 SV=2
78		true	6889	570.6625	570.6616	1708.9630	3	1.50	4.23	54.09	53.8 (M:53.8)	3	98.83	1	2	K.KILGYINTGKQEGAK.L	Acetyl:2H(3): 1, 10	CID	369 - 383	ALDH2_HUMAN	Aldehyde dehydrogenase, mitochondrial OS=Homo sapiens GN=ALDH2 PE=1 SV=2
79		true	11874	946.8541	946.8546	2837.5420	3	-0.54	14.62	83.14	36.7 (M:36.7)	2		1	3	K.KILGYINTGKQEGAKLLCGGGIAADR.G	Carbamidomethyl: 18; Acetyl:2H(3): 1, 10, 15	CID	369 - 394	ALDH2_HUMAN	Aldehyde dehydrogenase, mitochondrial OS=Homo sapiens GN=ALDH2 PE=1 SV=2
80		true	4998	489.7847	489.7846	977.5546	2	0.29	6.53	43.20	97.7 (M:97.7)	5		1	0	K.ILGYINTGK.Q		CID	370 - 378	ALDH2_HUMAN	Aldehyde dehydrogenase, mitochondrial OS=Homo sapiens GN=ALDH2 PE=1 SV=2
81		true	3585	497.9441	497.9437	1490.8093	3	0.85	11.31	35.42	144.1 (M:144.1)	4		1	1	K.ILGYINTGKQEGAK.L		CID	370 - 383	ALDH2_HUMAN	Aldehyde dehydrogenase, mitochondrial OS=Homo sapiens GN=ALDH2 PE=1 SV=2
83		true	5792	768.9259	768.9266	1535.8387	2	-0.91	9.47	47.71	91.9 (M:91.9)	6	100.00	1	1	K.ILGYINTGKQEGAK.L	Acetyl:2H(3): 9	CID	370 - 383	ALDH2_HUMAN	Aldehyde dehydrogenase, mitochondrial OS=Homo sapiens GN=ALDH2 PE=1 SV=2
84		true	11133	887.1344	887.1339	2658.3799	3	0.57	10.13	78.66	80.5 (M:80.5)	3		1	2	K.ILGYINTGKQEGAKLLCGGGIAADR.G	Carbamidomethyl: 17; Acetyl: 9, 14	CID	370 - 394	ALDH2_HUMAN	Aldehyde dehydrogenase, mitochondrial OS=Homo sapiens GN=ALDH2 PE=1 SV=2
85		true	11111	889.1444	889.1465	2664.4176	3	-2.32	7.15	78.55	119.3 (M:119.3)	3		1	2	K.ILGYINTGKQEGAKLLCGGGIAADR.G	Carbamidomethyl: 17; Acetyl:2H(3): 9, 14	CID	370 - 394	ALDH2_HUMAN	Aldehyde dehydrogenase, mitochondrial OS=Homo sapiens GN=ALDH2 PE=1 SV=2
86		true	6501	553.2830	553.2824	1656.8254	3	1.02	6.65	51.76	111.5 (M:111.5)	5		1	1	K.QEGAKLLCGGGIAADR.G	Carbamidomethyl: 8; Acetyl: 5	CID	379 - 394	ALDH2_HUMAN	Aldehyde dehydrogenase, mitochondrial OS=Homo sapiens GN=ALDH2 PE=1 SV=2
87		true	6456	830.9282	830.9294	1659.8442	2	-1.45	8.13	51.54	122.4 (M:122.4)	7		1	1	K.QEGAKLLCGGGIAADR.G	Carbamidomethyl: 8; Acetyl:2H(3): 5	CID	379 - 394	ALDH2_HUMAN	Aldehyde dehydrogenase, mitochondrial OS=Homo sapiens GN=ALDH2 PE=1 SV=2
88		true	3826	551.7883	551.7873	1101.5601	2	1.80	3.19	36.73	132.4 (M:132.4)	5		1	0	K.LLCGGGIAADR.G	Carbamidomethyl: 3	CID	384 - 394	ALDH2_HUMAN	Aldehyde dehydrogenase, mitochondrial OS=Homo sapiens GN=ALDH2 PE=1 SV=2
89		true	11773	1094.0438	1094.0432	2186.0718	2	0.55	12.69	82.53	25.6 (M:25.6)	1		1	0	R.GYFIQPTVFGDVQDGMTIAK.E		CID	395 - 414	ALDH2_HUMAN	Aldehyde dehydrogenase, mitochondrial OS=Homo sapiens GN=ALDH2 PE=1 SV=2
90		true	12296	702.3839	702.3838	1402.7530	2	0.20	9.39	85.76	38.9 (M:38.9)	10		1	0	K.EEIFGPVMQILK.F		CID	415 - 426	ALDH2_HUMAN	Aldehyde dehydrogenase, mitochondrial OS=Homo sapiens GN=ALDH2 PE=1 SV=2
91		true	5238	393.2237	393.2240	1176.6503	3	-0.90	8.58	44.52	24.8 (M:24.8)	2		1	1	K.FKTIEEVVGR.A		CID	427 - 436	ALDH2_HUMAN	Aldehyde dehydrogenase, mitochondrial OS=Homo sapiens GN=ALDH2 PE=1 SV=2
92		true	7753	610.3381	610.3377	1218.6608	2	0.61	3.23	59.14	81.2 (M:81.2)	7		1	1	K.FKTIEEVVGR.A	Acetyl: 2	CID	427 - 436	ALDH2_HUMAN	Aldehyde dehydrogenase, mitochondrial OS=Homo sapiens GN=ALDH2 PE=1 SV=2
93		true	7733	611.8470	611.8471	1221.6797	2	-0.20	5.35	59.04	88.8 (M:88.8)	6		1	1	K.FKTIEEVVGR.A	Acetyl:2H(3): 2	CID	427 - 436	ALDH2_HUMAN	Aldehyde dehydrogenase, mitochondrial OS=Homo sapiens GN=ALDH2 PE=1 SV=2
94		true	3157	451.7507	451.7507	901.4869	2	-0.01	4.90	33.10	42.2 (M:42.2)	6		1	0	K.TIEEVVGR.A		CID	429 - 436	ALDH2_HUMAN	Aldehyde dehydrogenase, mitochondrial OS=Homo sapiens GN=ALDH2 PE=1 SV=2
95		true	8573	764.3944	764.3937	1526.7729	2	0.81	4.32	63.80	152.7 (M:152.7)	14		1	0	R.ANNSTYGLAAAVFTK.D		CID	437 - 451	ALDH2_HUMAN	Aldehyde dehydrogenase, mitochondrial OS=Homo sapiens GN=ALDH2 PE=1 SV=2
96		true	7997	800.3994	800.3987	1598.7828	2	0.95	9.31	60.45	152.7 (M:152.7)	12		1	0	R.ELGEYGLQAYTEVK.T		CID	493 - 506	ALDH2_HUMAN	Aldehyde dehydrogenase, mitochondrial OS=Homo sapiens GN=ALDH2 PE=1 SV=2
97		true	10750	724.0478	724.0474	2169.1205	3	0.43	11.44	76.34	42.0 (M:42.0)	1	99.63	1	1	R.ELGEYGLQAYTEVKTVTVK.V	Acetyl: 14	CID	493 - 511	ALDH2_HUMAN	Aldehyde dehydrogenase, mitochondrial OS=Homo sapiens GN=ALDH2 PE=1 SV=2
98		true	3290	521.3191	521.3188	1040.6230	2	0.70	9.91	33.87	49.0 (M:49.0)	3	99.98	1	1	K.TVTVKVPQK.N	Acetyl: 5	CID	507 - 515	ALDH2_HUMAN	Aldehyde dehydrogenase, mitochondrial OS=Homo sapiens GN=ALDH2 PE=1 SV=2
99		true	3280	522.8284	522.8282	1043.6418	2	0.36	10.85	33.81	40.3 (M:40.3)	4	99.63	1	1	K.TVTVKVPQK.N	Acetyl:2H(3): 5	CID	507 - 515	ALDH2_HUMAN	Aldehyde dehydrogenase, mitochondrial OS=Homo sapiens GN=ALDH2 PE=1 SV=2
100		true	1466	400.9036	400.9031	1199.6874	3	1.27	6.05	23.92	20.1 (M:20.1)	1		1	2	K.TVTVKVPQKNS.-		CID	507 - 517	ALDH2_HUMAN	Aldehyde dehydrogenase, mitochondrial OS=Homo sapiens GN=ALDH2 PE=1 SV=2
101		true	3078	623.3664	623.3657	1244.7168	2	1.11	14.07	32.69	29.6 (M:29.6)	1		1	2	K.TVTVKVPQKNS.-	Acetyl:2H(3): 5	CID	507 - 517	ALDH2_HUMAN	Aldehyde dehydrogenase, mitochondrial OS=Homo sapiens GN=ALDH2 PE=1 SV=2
102		true	5855	642.8635	642.8615	1283.7085	2	2.98	6.92	48.03	19.4 (M:19.4)	1		1	2	K.TVTVKVPQKNS.-	Acetyl: 5, 9	CID	507 - 517	ALDH2_HUMAN	Aldehyde dehydrogenase, mitochondrial OS=Homo sapiens GN=ALDH2 PE=1 SV=2

## Sheet: Sample 4
Row	User Flag	OK	Cmpd.	m/z meas.	m/z calc.	Mr calc.	z	Δ m/z [ppm]	RMS90 [ppm]	Rt [min]	Scores	#Cmpds.	Site [%]	Rank	P	Sequence	Modifications	Type	Range	Accession	Protein
1		true	11119	793.0617	793.0617	2376.1631	3	0.01	8.14	60.74	16.4 (M:16.4)	2		1	1	R.KTFPTVNPSTGEVICQVAEGDK.E	Carbamidomethyl: 15	CID	52 - 73	ALDH2_HUMAN	Aldehyde dehydrogenase, mitochondrial OS=Homo sapiens GN=ALDH2 PE=1 SV=2
2		true	13278	808.0718	808.0715	2421.1925	3	0.37	6.80	69.11	23.1 (M:23.1)	2		1	1	R.KTFPTVNPSTGEVICQVAEGDK.E	Carbamidomethyl: 15; Acetyl:2H(3): 1	CID	52 - 73	ALDH2_HUMAN	Aldehyde dehydrogenase, mitochondrial OS=Homo sapiens GN=ALDH2 PE=1 SV=2
3		true	10971	741.6132	741.6130	2962.4230	4	0.24	2.08	60.26	42.2 (M:42.2)	7		1	2	R.KTFPTVNPSTGEVICQVAEGDKEDVDK.A	Carbamidomethyl: 15	CID	52 - 78	ALDH2_HUMAN	Aldehyde dehydrogenase, mitochondrial OS=Homo sapiens GN=ALDH2 PE=1 SV=2
4		true	12990	1002.4851	1002.4851	3004.4335	3	-0.05	3.89	68.01	46.4 (M:46.4)	6		1	2	R.KTFPTVNPSTGEVICQVAEGDKEDVDK.A	Carbamidomethyl: 15; Acetyl: 1	CID	52 - 78	ALDH2_HUMAN	Aldehyde dehydrogenase, mitochondrial OS=Homo sapiens GN=ALDH2 PE=1 SV=2
5		true	12753	1002.4857	1002.4851	3004.4335	3	0.57	8.51	67.07	23.2 (M:23.2)	12	88.17	1	2	R.KTFPTVNPSTGEVICQVAEGDKEDVDK.A	Carbamidomethyl: 15; Acetyl: 22	CID	52 - 78	ALDH2_HUMAN	Aldehyde dehydrogenase, mitochondrial OS=Homo sapiens GN=ALDH2 PE=1 SV=2
7		true	14491	1016.4887	1016.4886	3046.4441	3	0.08	7.93	73.92	14.9 (M:14.9)	2		1	2	R.KTFPTVNPSTGEVICQVAEGDKEDVDK.A	Carbamidomethyl: 15; Acetyl: 1, 22	CID	52 - 78	ALDH2_HUMAN	Aldehyde dehydrogenase, mitochondrial OS=Homo sapiens GN=ALDH2 PE=1 SV=2
9		true	14454	1018.5022	1018.5012	3052.4818	3	0.93	4.88	73.76	22.4 (M:22.4)	6	84.79	1	2	R.KTFPTVNPSTGEVICQVAEGDKEDVDK.A	Carbamidomethyl: 15; Acetyl:2H(3): 1, 22	CID	52 - 78	ALDH2_HUMAN	Aldehyde dehydrogenase, mitochondrial OS=Homo sapiens GN=ALDH2 PE=1 SV=2
10		true	11998	653.1319	653.1320	3260.6235	5	-0.08	5.47	64.05	39.4 (M:39.4)	4		1	3	R.KTFPTVNPSTGEVICQVAEGDKEDVDKAVK.A	Carbamidomethyl: 15	CID	52 - 81	ALDH2_HUMAN	Aldehyde dehydrogenase, mitochondrial OS=Homo sapiens GN=ALDH2 PE=1 SV=2
11		true	12563	826.6661	826.6658	3302.6340	4	0.36	3.40	66.34	18.5 (M:18.5)	7	48.41	1	3	R.KTFPTVNPSTGEVICQVAEGDKEDVDKAVK.A	Carbamidomethyl: 15; Acetyl: 27	CID	52 - 81	ALDH2_HUMAN	Aldehyde dehydrogenase, mitochondrial OS=Homo sapiens GN=ALDH2 PE=1 SV=2
13		true	14166	1115.8890	1115.8888	3344.6446	3	0.13	4.59	72.66	25.8 (M:25.8)	4	48.54	1	3	R.KTFPTVNPSTGEVICQVAEGDKEDVDKAVK.A	Carbamidomethyl: 15; Acetyl: 1, 27	CID	52 - 81	ALDH2_HUMAN	Aldehyde dehydrogenase, mitochondrial OS=Homo sapiens GN=ALDH2 PE=1 SV=2
15		true	14867	1115.8892	1115.8888	3344.6446	3	0.32	4.64	75.48	33.1 (M:33.1)	6	81.14	1	3	R.KTFPTVNPSTGEVICQVAEGDKEDVDKAVK.A	Carbamidomethyl: 15; Acetyl: 22, 27	CID	52 - 81	ALDH2_HUMAN	Aldehyde dehydrogenase, mitochondrial OS=Homo sapiens GN=ALDH2 PE=1 SV=2
16		true	14894	1116.8928	1116.8951	3347.6634	3	-2.01	6.34	75.55	16.1 (M:16.1)	2	30.95	1	3	R.KTFPTVNPSTGEVICQVAEGDKEDVDKAVK.A	Carbamidomethyl: 15; Acetyl: 27; Acetyl:2H(3): 22	CID	52 - 81	ALDH2_HUMAN	Aldehyde dehydrogenase, mitochondrial OS=Homo sapiens GN=ALDH2 PE=1 SV=2
17		true	14146	1117.9015	1117.9014	3350.6823	3	0.15	3.43	72.57	28.3 (M:28.3)	8	47.25	1	3	R.KTFPTVNPSTGEVICQVAEGDKEDVDKAVK.A	Carbamidomethyl: 15; Acetyl:2H(3): 1, 30	CID	52 - 81	ALDH2_HUMAN	Aldehyde dehydrogenase, mitochondrial OS=Homo sapiens GN=ALDH2 PE=1 SV=2
18		true	16316	1129.8940	1129.8923	3386.6552	3	1.51	8.57	81.57	18.8 (M:18.8)	1	64.88	1	3	R.KTFPTVNPSTGEVICQVAEGDKEDVDKAVK.A	Carbamidomethyl: 15; Acetyl: 1, 22, 27	CID	52 - 81	ALDH2_HUMAN	Aldehyde dehydrogenase, mitochondrial OS=Homo sapiens GN=ALDH2 PE=1 SV=2
19		true	16305	1132.9122	1132.9112	3395.7117	3	0.91	8.56	81.52	24.1 (M:24.1)	3	70.75	1	3	R.KTFPTVNPSTGEVICQVAEGDKEDVDKAVK.A	Carbamidomethyl: 15; Acetyl:2H(3): 1, 22, 27	CID	52 - 81	ALDH2_HUMAN	Aldehyde dehydrogenase, mitochondrial OS=Homo sapiens GN=ALDH2 PE=1 SV=2
21		true	12983	1125.0420	1125.0414	2248.0682	2	0.54	5.97	67.97	20.2 (M:20.2)	3		1	0	K.TFPTVNPSTGEVICQVAEGDK.E	Carbamidomethyl: 14	CID	53 - 73	ALDH2_HUMAN	Aldehyde dehydrogenase, mitochondrial OS=Homo sapiens GN=ALDH2 PE=1 SV=2
22		true	12648	945.7843	945.7833	2834.3280	3	1.08	2.39	66.65	56.8 (M:56.8)	7		1	1	K.TFPTVNPSTGEVICQVAEGDKEDVDK.A	Carbamidomethyl: 14	CID	53 - 78	ALDH2_HUMAN	Aldehyde dehydrogenase, mitochondrial OS=Homo sapiens GN=ALDH2 PE=1 SV=2
24		true	14332	1439.1772	1439.1766	2876.3386	2	0.42	6.26	73.25	22.3 (M:22.3)	15	91.18	1	1	K.TFPTVNPSTGEVICQVAEGDKEDVDK.A	Carbamidomethyl: 14; Acetyl: 21	CID	53 - 78	ALDH2_HUMAN	Aldehyde dehydrogenase, mitochondrial OS=Homo sapiens GN=ALDH2 PE=1 SV=2
25		true	13357	784.1395	784.1394	3132.5285	4	0.17	5.02	69.42	35.6 (M:35.6)	2		1	2	K.TFPTVNPSTGEVICQVAEGDKEDVDKAVK.A	Carbamidomethyl: 14	CID	53 - 81	ALDH2_HUMAN	Aldehyde dehydrogenase, mitochondrial OS=Homo sapiens GN=ALDH2 PE=1 SV=2
26		true	13933	1059.1877	1059.1870	3174.5391	3	0.71	3.26	71.87	28.8 (M:28.8)	9	53.60	1	2	K.TFPTVNPSTGEVICQVAEGDKEDVDKAVK.A	Carbamidomethyl: 14; Acetyl: 26	CID	53 - 81	ALDH2_HUMAN	Aldehyde dehydrogenase, mitochondrial OS=Homo sapiens GN=ALDH2 PE=1 SV=2
27		true	16258	1073.1915	1073.1905	3216.5496	3	0.94	3.54	81.36	20.0 (M:20.0)	7	65.67	1	2	K.TFPTVNPSTGEVICQVAEGDKEDVDKAVK.A	Carbamidomethyl: 14; Acetyl: 21, 26	CID	53 - 81	ALDH2_HUMAN	Aldehyde dehydrogenase, mitochondrial OS=Homo sapiens GN=ALDH2 PE=1 SV=2
29		true	15444	869.1865	869.1859	3472.7144	4	0.75	5.41	77.87	21.9 (M:21.9)	4	84.00	1	3	K.TFPTVNPSTGEVICQVAEGDKEDVDKAVKAAR.A	Carbamidomethyl: 14; Acetyl: 29	CID	53 - 84	ALDH2_HUMAN	Aldehyde dehydrogenase, mitochondrial OS=Homo sapiens GN=ALDH2 PE=1 SV=2
31		true	16005	1172.5839	1172.5823	3514.7250	3	1.36	4.39	80.37	25.3 (M:25.3)	3	83.67	1	3	K.TFPTVNPSTGEVICQVAEGDKEDVDKAVKAAR.A	Carbamidomethyl: 14; Acetyl: 26, 29	CID	53 - 84	ALDH2_HUMAN	Aldehyde dehydrogenase, mitochondrial OS=Homo sapiens GN=ALDH2 PE=1 SV=2
32		true	18246	1186.5875	1186.5858	3556.7355	3	1.46	4.98	91.65	23.0 (M:23.0)	4		1	3	K.TFPTVNPSTGEVICQVAEGDKEDVDKAVKAAR.A	Carbamidomethyl: 14; Acetyl: 21, 26, 29	CID	53 - 84	ALDH2_HUMAN	Aldehyde dehydrogenase, mitochondrial OS=Homo sapiens GN=ALDH2 PE=1 SV=2
33		true	18247	1189.6054	1189.6046	3565.7920	3	0.61	7.71	91.65	31.8 (M:31.8)	2		1	3	K.TFPTVNPSTGEVICQVAEGDKEDVDKAVKAAR.A	Carbamidomethyl: 14; Acetyl:2H(3): 21, 26, 29	CID	53 - 84	ALDH2_HUMAN	Aldehyde dehydrogenase, mitochondrial OS=Homo sapiens GN=ALDH2 PE=1 SV=2
36		true	4645	486.8982	486.8982	1457.6728	3	-0.12	12.73	36.87	19.1 (M:19.1)	4		1	1	R.YYAGWADKYHGK.T		CID	148 - 159	ALDH2_HUMAN	Aldehyde dehydrogenase, mitochondrial OS=Homo sapiens GN=ALDH2 PE=1 SV=2
37		true	7672	500.9019	500.9017	1499.6834	3	0.32	3.31	48.15	13.2 (M:13.2)	3		1	1	R.YYAGWADKYHGK.T	Acetyl: 8	CID	148 - 159	ALDH2_HUMAN	Aldehyde dehydrogenase, mitochondrial OS=Homo sapiens GN=ALDH2 PE=1 SV=2
38		true	15869	754.1098	754.1093	3012.4083	4	0.54	3.38	79.74	20.0 (M:20.0)	6	77.11	1	2	R.YYAGWADKYHGKTIPIDGDFFSYTR.H	Acetyl: 12	CID	148 - 172	ALDH2_HUMAN	Aldehyde dehydrogenase, mitochondrial OS=Homo sapiens GN=ALDH2 PE=1 SV=2
39		true	14669	687.0024	687.0022	2057.9847	3	0.36	1.85	74.65	24.4 (M:24.4)	5		1	1	K.YHGKTIPIDGDFFSYTR.H	Acetyl: 4	CID	156 - 172	ALDH2_HUMAN	Aldehyde dehydrogenase, mitochondrial OS=Homo sapiens GN=ALDH2 PE=1 SV=2
40		true	14922	766.3751	766.3750	1530.7355	2	0.10	1.64	75.69	23.2 (M:23.2)	11		1	0	K.TIPIDGDFFSYTR.H		CID	160 - 172	ALDH2_HUMAN	Aldehyde dehydrogenase, mitochondrial OS=Homo sapiens GN=ALDH2 PE=1 SV=2
41		true	21053	907.4643	907.4662	2719.3767	3	-2.11	5.03	107.92	14.4 (M:14.4)	2		1	0	R.HEPVGVCGQIIPWNFPLLMQAWK.L	Carbamidomethyl: 7	CID	173 - 195	ALDH2_HUMAN	Aldehyde dehydrogenase, mitochondrial OS=Homo sapiens GN=ALDH2 PE=1 SV=2
42		true	10391	685.3969	685.3972	1368.7799	2	-0.55	2.68	58.21	35.4 (M:35.4)	4		1	0	K.LGPALATGNVVVMK.V		CID	196 - 209	ALDH2_HUMAN	Aldehyde dehydrogenase, mitochondrial OS=Homo sapiens GN=ALDH2 PE=1 SV=2
43		true	8034	693.3946	693.3947	1384.7748	2	-0.11	3.17	49.61	31.9 (M:31.9)	4		1	0	K.LGPALATGNVVVMK.V	Oxidation: 13	CID	196 - 209	ALDH2_HUMAN	Aldehyde dehydrogenase, mitochondrial OS=Homo sapiens GN=ALDH2 PE=1 SV=2
44		true	18096	922.5301	922.5300	1843.0455	2	0.11	4.78	90.92	31.9 (M:31.9)	5		1	0	K.VAEQTPLTALYVANLIK.E		CID	210 - 226	ALDH2_HUMAN	Aldehyde dehydrogenase, mitochondrial OS=Homo sapiens GN=ALDH2 PE=1 SV=2
45		true	16437	1007.1771	1007.1768	3018.5087	3	0.25	3.83	82.15	48.1 (M:48.1)	7		1	0	K.EAGFPPGVVNIVPGFGPTAGAAIASHEDVDK.V		CID	227 - 257	ALDH2_HUMAN	Aldehyde dehydrogenase, mitochondrial OS=Homo sapiens GN=ALDH2 PE=1 SV=2
46		true	5793	569.2989	569.2986	1136.5826	2	0.51	1.22	41.09	21.0 (M:21.0)	5		1	0	K.VAFTGSTEIGR.V		CID	258 - 268	ALDH2_HUMAN	Aldehyde dehydrogenase, mitochondrial OS=Homo sapiens GN=ALDH2 PE=1 SV=2
47		true	4444	593.8427	593.8431	1185.6717	2	-0.73	1.86	36.14	18.4 (M:18.4)	1		1	0	R.VIQVAAGSSNLK.R		CID	269 - 280	ALDH2_HUMAN	Aldehyde dehydrogenase, mitochondrial OS=Homo sapiens GN=ALDH2 PE=1 SV=2
48		true	3472	448.2649	448.2649	1341.7728	3	0.06	0.70	32.39	28.6 (M:28.6)	8		1	1	R.VIQVAAGSSNLKR.V		CID	269 - 281	ALDH2_HUMAN	Aldehyde dehydrogenase, mitochondrial OS=Homo sapiens GN=ALDH2 PE=1 SV=2
49		true	5554	692.8989	692.8990	1383.7834	2	-0.12	5.49	40.21	19.9 (M:19.9)	4		1	1	R.VIQVAAGSSNLKR.V	Acetyl: 12	CID	269 - 281	ALDH2_HUMAN	Aldehyde dehydrogenase, mitochondrial OS=Homo sapiens GN=ALDH2 PE=1 SV=2
50		true	5565	694.4084	694.4084	1386.8022	2	0.05	3.06	40.25	18.0 (M:18.0)	6		1	1	R.VIQVAAGSSNLKR.V	Acetyl:2H(3): 12	CID	269 - 281	ALDH2_HUMAN	Aldehyde dehydrogenase, mitochondrial OS=Homo sapiens GN=ALDH2 PE=1 SV=2
51		true	15458	895.4180	895.4176	1788.8206	2	0.46	2.62	77.93	33.0 (M:33.0)	7		1	0	R.TFVQEDIYDEFVER.S		CID	325 - 338	ALDH2_HUMAN	Aldehyde dehydrogenase, mitochondrial OS=Homo sapiens GN=ALDH2 PE=1 SV=2
52		true	5673	481.7505	481.7507	961.4869	2	-0.45	4.71	40.62	16.5 (M:16.5)	4		1	0	R.VVGNPFDSK.T		CID	347 - 355	ALDH2_HUMAN	Aldehyde dehydrogenase, mitochondrial OS=Homo sapiens GN=ALDH2 PE=1 SV=2
53		true	9543	817.4000	817.3993	2449.1761	3	0.84	4.37	55.08	33.3 (M:33.3)	4		1	1	R.VVGNPFDSKTEQGPQVDETQFK.K		CID	347 - 368	ALDH2_HUMAN	Aldehyde dehydrogenase, mitochondrial OS=Homo sapiens GN=ALDH2 PE=1 SV=2
54		true	11297	831.4031	831.4028	2491.1867	3	0.29	4.27	61.32	27.4 (M:27.4)	6		1	1	R.VVGNPFDSKTEQGPQVDETQFK.K	Acetyl: 9	CID	347 - 368	ALDH2_HUMAN	Aldehyde dehydrogenase, mitochondrial OS=Homo sapiens GN=ALDH2 PE=1 SV=2
55		true	8152	645.3255	645.3251	2577.2711	4	0.73	7.81	50.04	18.4 (M:18.4)	2		1	2	R.VVGNPFDSKTEQGPQVDETQFKK.I		CID	347 - 369	ALDH2_HUMAN	Aldehyde dehydrogenase, mitochondrial OS=Homo sapiens GN=ALDH2 PE=1 SV=2
56		true	9813	655.8280	655.8277	2619.2817	4	0.47	3.88	56.07	40.5 (M:40.5)	10		1	2	R.VVGNPFDSKTEQGPQVDETQFKK.I	Acetyl: 9	CID	347 - 369	ALDH2_HUMAN	Aldehyde dehydrogenase, mitochondrial OS=Homo sapiens GN=ALDH2 PE=1 SV=2
57		true	11428	888.1049	888.1047	2661.2922	3	0.21	3.20	61.79	25.4 (M:25.4)	6	50.00	1	2	R.VVGNPFDSKTEQGPQVDETQFKK.I	Acetyl: 9, 23	CID	347 - 369	ALDH2_HUMAN	Aldehyde dehydrogenase, mitochondrial OS=Homo sapiens GN=ALDH2 PE=1 SV=2
58		true	11518	890.1176	890.1172	2667.3299	3	0.39	4.09	62.07	28.6 (M:28.6)	8	50.00	1	2	R.VVGNPFDSKTEQGPQVDETQFKK.I	Acetyl:2H(3): 9, 23	CID	347 - 369	ALDH2_HUMAN	Aldehyde dehydrogenase, mitochondrial OS=Homo sapiens GN=ALDH2 PE=1 SV=2
59		true	4659	753.8572	753.8572	1505.6998	2	0.04	4.96	36.92	38.8 (M:38.8)	8		1	0	K.TEQGPQVDETQFK.K		CID	356 - 368	ALDH2_HUMAN	Aldehyde dehydrogenase, mitochondrial OS=Homo sapiens GN=ALDH2 PE=1 SV=2
60		true	3605	545.6060	545.6055	1633.7948	3	0.90	2.87	32.86	24.7 (M:24.7)	3		1	1	K.TEQGPQVDETQFKK.I		CID	356 - 369	ALDH2_HUMAN	Aldehyde dehydrogenase, mitochondrial OS=Homo sapiens GN=ALDH2 PE=1 SV=2
61		true	5603	838.9101	838.9099	1675.8053	2	0.22	4.18	40.37	24.8 (M:24.8)	6	50.00	1	1	K.TEQGPQVDETQFKK.I	Acetyl: 13	CID	356 - 369	ALDH2_HUMAN	Aldehyde dehydrogenase, mitochondrial OS=Homo sapiens GN=ALDH2 PE=1 SV=2
62		true	5566	840.4193	840.4194	1678.8242	2	-0.06	5.39	40.26	32.8 (M:32.8)	10	50.00	1	1	K.TEQGPQVDETQFKK.I	Acetyl:2H(3): 13	CID	356 - 369	ALDH2_HUMAN	Aldehyde dehydrogenase, mitochondrial OS=Homo sapiens GN=ALDH2 PE=1 SV=2
63		true	18404	893.4613	893.4606	2677.3599	3	0.78	5.04	92.57	19.2 (M:19.2)	3		1	2	K.TEQGPQVDETQFKKILGYINTGK.Q	Acetyl: 13, 14	CID	356 - 378	ALDH2_HUMAN	Aldehyde dehydrogenase, mitochondrial OS=Homo sapiens GN=ALDH2 PE=1 SV=2
64		true	18393	895.4735	895.4731	2683.3976	3	0.35	6.41	92.52	20.4 (M:20.4)	2		1	2	K.TEQGPQVDETQFKKILGYINTGK.Q	Acetyl:2H(3): 13, 14	CID	356 - 378	ALDH2_HUMAN	Aldehyde dehydrogenase, mitochondrial OS=Homo sapiens GN=ALDH2 PE=1 SV=2
65		true	18166	1078.5495	1078.5490	3232.6252	3	0.42	7.48	91.24	15.1 (M:15.1)	3		1	3	K.TEQGPQVDETQFKKILGYINTGKQEGAK.L	Acetyl: 13, 14, 23	CID	356 - 383	ALDH2_HUMAN	Aldehyde dehydrogenase, mitochondrial OS=Homo sapiens GN=ALDH2 PE=1 SV=2
66		true	18144	1081.5683	1081.5678	3241.6817	3	0.44	7.52	91.13	18.3 (M:18.3)	2	84.54	1	3	K.TEQGPQVDETQFKKILGYINTGKQEGAK.L	Acetyl:2H(3): 13, 14, 23	CID	356 - 383	ALDH2_HUMAN	Aldehyde dehydrogenase, mitochondrial OS=Homo sapiens GN=ALDH2 PE=1 SV=2
69		true	9619	852.4700	852.4700	1702.9254	2	0.06	4.57	55.34	17.1 (M:17.1)	4	80.82	1	2	K.KILGYINTGKQEGAK.L	Acetyl: 1, 10	CID	369 - 383	ALDH2_HUMAN	Aldehyde dehydrogenase, mitochondrial OS=Homo sapiens GN=ALDH2 PE=1 SV=2
70		true	9559	855.4891	855.4888	1708.9630	2	0.35	3.68	55.13	20.7 (M:20.7)	5	71.14	1	2	K.KILGYINTGKQEGAK.L	Acetyl:2H(3): 1, 10	CID	369 - 383	ALDH2_HUMAN	Aldehyde dehydrogenase, mitochondrial OS=Homo sapiens GN=ALDH2 PE=1 SV=2
71		true	15148	929.8329	929.8322	2786.4749	3	0.72	12.19	76.73	13.5 (M:13.5)	1		1	3	K.KILGYINTGKQEGAKLLCGGGIAADR.G	Carbamidomethyl: 18; Acetyl: 10, 15	CID	369 - 394	ALDH2_HUMAN	Aldehyde dehydrogenase, mitochondrial OS=Homo sapiens GN=ALDH2 PE=1 SV=2
73		true	16913	943.8357	943.8358	2828.4855	3	-0.07	6.79	84.51	20.0 (M:20.0)	1		1	3	K.KILGYINTGKQEGAKLLCGGGIAADR.G	Carbamidomethyl: 18; Acetyl: 1, 10, 15	CID	369 - 394	ALDH2_HUMAN	Aldehyde dehydrogenase, mitochondrial OS=Homo sapiens GN=ALDH2 PE=1 SV=2
74		true	16911	946.8552	946.8546	2837.5420	3	0.65	6.38	84.51	27.0 (M:27.0)	3		1	3	K.KILGYINTGKQEGAKLLCGGGIAADR.G	Carbamidomethyl: 18; Acetyl:2H(3): 1, 10, 15	CID	369 - 394	ALDH2_HUMAN	Aldehyde dehydrogenase, mitochondrial OS=Homo sapiens GN=ALDH2 PE=1 SV=2
75		true	6718	489.7846	489.7846	977.5546	2	-0.04	0.55	44.78	18.1 (M:18.1)	4		1	0	K.ILGYINTGK.Q		CID	370 - 378	ALDH2_HUMAN	Aldehyde dehydrogenase, mitochondrial OS=Homo sapiens GN=ALDH2 PE=1 SV=2
76		true	7642	767.4170	767.4172	1532.8199	2	-0.33	2.98	48.05	16.2 (M:16.2)	4	70.39	1	1	K.ILGYINTGKQEGAK.L	Acetyl: 9	CID	370 - 383	ALDH2_HUMAN	Aldehyde dehydrogenase, mitochondrial OS=Homo sapiens GN=ALDH2 PE=1 SV=2
78		true	7639	768.9264	768.9266	1535.8387	2	-0.34	2.51	48.05	19.6 (M:19.6)	8		1	1	K.ILGYINTGKQEGAK.L	Acetyl:2H(3): 9	CID	370 - 383	ALDH2_HUMAN	Aldehyde dehydrogenase, mitochondrial OS=Homo sapiens GN=ALDH2 PE=1 SV=2
79		true	15817	887.1343	887.1339	2658.3799	3	0.44	3.70	79.53	33.0 (M:33.0)	5		1	2	K.ILGYINTGKQEGAKLLCGGGIAADR.G	Carbamidomethyl: 17; Acetyl: 9, 14	CID	370 - 394	ALDH2_HUMAN	Aldehyde dehydrogenase, mitochondrial OS=Homo sapiens GN=ALDH2 PE=1 SV=2
80		true	15803	889.1473	889.1465	2664.4176	3	0.92	3.72	79.48	27.9 (M:27.9)	4		1	2	K.ILGYINTGKQEGAKLLCGGGIAADR.G	Carbamidomethyl: 17; Acetyl:2H(3): 9, 14	CID	370 - 394	ALDH2_HUMAN	Aldehyde dehydrogenase, mitochondrial OS=Homo sapiens GN=ALDH2 PE=1 SV=2
81		true	8785	829.4204	829.4200	1656.8254	2	0.57	2.83	52.35	23.3 (M:23.3)	4		1	1	K.QEGAKLLCGGGIAADR.G	Carbamidomethyl: 8; Acetyl: 5	CID	379 - 394	ALDH2_HUMAN	Aldehyde dehydrogenase, mitochondrial OS=Homo sapiens GN=ALDH2 PE=1 SV=2
82		true	8783	830.9293	830.9294	1659.8442	2	-0.07	2.05	52.34	28.8 (M:28.8)	5		1	1	K.QEGAKLLCGGGIAADR.G	Carbamidomethyl: 8; Acetyl:2H(3): 5	CID	379 - 394	ALDH2_HUMAN	Aldehyde dehydrogenase, mitochondrial OS=Homo sapiens GN=ALDH2 PE=1 SV=2
84		true	16786	1094.0437	1094.0432	2186.0718	2	0.50	3.56	83.94	34.4 (M:34.4)	6		1	0	R.GYFIQPTVFGDVQDGMTIAK.E		CID	395 - 414	ALDH2_HUMAN	Aldehyde dehydrogenase, mitochondrial OS=Homo sapiens GN=ALDH2 PE=1 SV=2
85		true	14983	1102.0405	1102.0406	2202.0667	2	-0.11	6.26	75.90	14.8 (M:14.8)	1		1	0	R.GYFIQPTVFGDVQDGMTIAK.E	Oxidation: 16	CID	395 - 414	ALDH2_HUMAN	Aldehyde dehydrogenase, mitochondrial OS=Homo sapiens GN=ALDH2 PE=1 SV=2
86		true	17948	702.3840	702.3838	1402.7530	2	0.27	2.77	90.11	13.1 (M:13.1)	1		1	0	K.EEIFGPVMQILK.F		CID	415 - 426	ALDH2_HUMAN	Aldehyde dehydrogenase, mitochondrial OS=Homo sapiens GN=ALDH2 PE=1 SV=2
88		true	11358	611.8467	611.8471	1221.6797	2	-0.70	4.63	61.58	14.1 (M:14.1)	6		1	1	K.FKTIEEVVGR.A	Acetyl:2H(3): 2	CID	427 - 436	ALDH2_HUMAN	Aldehyde dehydrogenase, mitochondrial OS=Homo sapiens GN=ALDH2 PE=1 SV=2
89		true	12727	764.3935	764.3937	1526.7729	2	-0.31	2.48	66.96	44.1 (M:44.1)	11		1	0	R.ANNSTYGLAAAVFTK.D		CID	437 - 451	ALDH2_HUMAN	Aldehyde dehydrogenase, mitochondrial OS=Homo sapiens GN=ALDH2 PE=1 SV=2
91		true	11226	800.3979	800.3987	1598.7828	2	-0.93	6.70	61.11	23.0 (M:23.0)	5		1	0	R.ELGEYGLQAYTEVK.T		CID	493 - 506	ALDH2_HUMAN	Aldehyde dehydrogenase, mitochondrial OS=Homo sapiens GN=ALDH2 PE=1 SV=2

## Sheet: Sample 5
Row	User Flag	OK	Cmpd.	m/z meas.	m/z calc.	Mr calc.	z	Δ m/z [ppm]	RMS90 [ppm]	Rt [min]	Scores	#Cmpds.	Site [%]	Rank	P	Sequence	Modifications	Type	Range	Accession	Protein
1		true	11142	793.0619	793.0617	2376.1631	3	0.28	10.31	60.71	22.9 (M:22.9)	2		1	1	R.KTFPTVNPSTGEVICQVAEGDK.E	Carbamidomethyl: 15	CID	52 - 73	ALDH2_HUMAN	Aldehyde dehydrogenase, mitochondrial OS=Homo sapiens GN=ALDH2 PE=1 SV=2
2		true	13293	808.0711	808.0715	2421.1925	3	-0.48	8.47	68.88	62.4 (M:62.4)	2		1	1	R.KTFPTVNPSTGEVICQVAEGDK.E	Carbamidomethyl: 15; Acetyl:2H(3): 1	CID	52 - 73	ALDH2_HUMAN	Aldehyde dehydrogenase, mitochondrial OS=Homo sapiens GN=ALDH2 PE=1 SV=2
3		true	10980	741.6128	741.6130	2962.4230	4	-0.26	2.13	60.13	105.2 (M:105.2)	8		1	2	R.KTFPTVNPSTGEVICQVAEGDKEDVDK.A	Carbamidomethyl: 15	CID	52 - 78	ALDH2_HUMAN	Aldehyde dehydrogenase, mitochondrial OS=Homo sapiens GN=ALDH2 PE=1 SV=2
4		true	12764	1002.4849	1002.4851	3004.4335	3	-0.19	5.46	66.83	51.3 (M:51.3)	13	95.97	1	2	R.KTFPTVNPSTGEVICQVAEGDKEDVDK.A	Carbamidomethyl: 15; Acetyl: 22	CID	52 - 78	ALDH2_HUMAN	Aldehyde dehydrogenase, mitochondrial OS=Homo sapiens GN=ALDH2 PE=1 SV=2
5		true	12948	1002.4853	1002.4851	3004.4335	3	0.16	4.44	67.61	146.6 (M:146.6)	7		1	2	R.KTFPTVNPSTGEVICQVAEGDKEDVDK.A	Carbamidomethyl: 15; Acetyl: 1	CID	52 - 78	ALDH2_HUMAN	Aldehyde dehydrogenase, mitochondrial OS=Homo sapiens GN=ALDH2 PE=1 SV=2
6		true	14514	1016.4890	1016.4886	3046.4441	3	0.39	6.12	73.73	24.2 (M:24.2)	4	95.48	1	2	R.KTFPTVNPSTGEVICQVAEGDKEDVDK.A	Carbamidomethyl: 15; Acetyl: 1, 22	CID	52 - 78	ALDH2_HUMAN	Aldehyde dehydrogenase, mitochondrial OS=Homo sapiens GN=ALDH2 PE=1 SV=2
8		true	14521	1018.5017	1018.5012	3052.4818	3	0.47	4.81	73.74	53.5 (M:53.5)	6	90.77	1	2	R.KTFPTVNPSTGEVICQVAEGDKEDVDK.A	Carbamidomethyl: 15; Acetyl:2H(3): 1, 22	CID	52 - 78	ALDH2_HUMAN	Aldehyde dehydrogenase, mitochondrial OS=Homo sapiens GN=ALDH2 PE=1 SV=2
9		true	11986	653.1313	653.1320	3260.6235	5	-1.09	8.72	63.80	64.8 (M:64.8)	2		1	3	R.KTFPTVNPSTGEVICQVAEGDKEDVDKAVK.A	Carbamidomethyl: 15	CID	52 - 81	ALDH2_HUMAN	Aldehyde dehydrogenase, mitochondrial OS=Homo sapiens GN=ALDH2 PE=1 SV=2
11		true	12553	826.6660	826.6658	3302.6340	4	0.30	10.39	66.09	55.5 (M:55.5)	14	80.01	1	3	R.KTFPTVNPSTGEVICQVAEGDKEDVDKAVK.A	Carbamidomethyl: 15; Acetyl: 30	CID	52 - 81	ALDH2_HUMAN	Aldehyde dehydrogenase, mitochondrial OS=Homo sapiens GN=ALDH2 PE=1 SV=2
13		true	16467	847.6712	847.6711	3386.6552	4	0.16	6.66	81.70	52.3 (M:52.3)	9	91.28	1	3	R.KTFPTVNPSTGEVICQVAEGDKEDVDKAVK.A	Carbamidomethyl: 15; Acetyl: 1, 22, 27	CID	52 - 81	ALDH2_HUMAN	Aldehyde dehydrogenase, mitochondrial OS=Homo sapiens GN=ALDH2 PE=1 SV=2
14		true	14930	1115.8881	1115.8888	3344.6446	3	-0.60	4.08	75.40	66.2 (M:66.2)	14	95.46	1	3	R.KTFPTVNPSTGEVICQVAEGDKEDVDKAVK.A	Carbamidomethyl: 15; Acetyl: 22, 27	CID	52 - 81	ALDH2_HUMAN	Aldehyde dehydrogenase, mitochondrial OS=Homo sapiens GN=ALDH2 PE=1 SV=2
15		true	14218	1115.8883	1115.8888	3344.6446	3	-0.47	7.40	72.63	70.9 (M:70.9)	6	48.74	1	3	R.KTFPTVNPSTGEVICQVAEGDKEDVDKAVK.A	Carbamidomethyl: 15; Acetyl: 1, 27	CID	52 - 81	ALDH2_HUMAN	Aldehyde dehydrogenase, mitochondrial OS=Homo sapiens GN=ALDH2 PE=1 SV=2
16		true	14891	1116.8910	1116.8951	3347.6634	3	-3.69	10.88	75.25	25.4 (M:25.4)	6	33.53	1	3	R.KTFPTVNPSTGEVICQVAEGDKEDVDKAVK.A	Carbamidomethyl: 15; Acetyl: 22; Acetyl:2H(3): 27	CID	52 - 81	ALDH2_HUMAN	Aldehyde dehydrogenase, mitochondrial OS=Homo sapiens GN=ALDH2 PE=1 SV=2
17		true	14954	1116.8916	1116.8951	3347.6634	3	-3.11	9.46	75.46	29.5 (M:29.5)	5	46.56	1	3	R.KTFPTVNPSTGEVICQVAEGDKEDVDKAVK.A	Carbamidomethyl: 15; Acetyl: 27; Acetyl:2H(3): 22	CID	52 - 81	ALDH2_HUMAN	Aldehyde dehydrogenase, mitochondrial OS=Homo sapiens GN=ALDH2 PE=1 SV=2
18		true	14200	1117.9006	1117.9014	3350.6823	3	-0.72	6.56	72.54	74.9 (M:74.9)	10	49.63	1	3	R.KTFPTVNPSTGEVICQVAEGDKEDVDKAVK.A	Carbamidomethyl: 15; Acetyl:2H(3): 1, 30	CID	52 - 81	ALDH2_HUMAN	Aldehyde dehydrogenase, mitochondrial OS=Homo sapiens GN=ALDH2 PE=1 SV=2
20		true	16463	1132.9113	1132.9112	3395.7117	3	0.11	3.87	81.66	64.5 (M:64.5)	13	86.05	1	3	R.KTFPTVNPSTGEVICQVAEGDKEDVDKAVK.A	Carbamidomethyl: 15; Acetyl:2H(3): 1, 22, 27	CID	52 - 81	ALDH2_HUMAN	Aldehyde dehydrogenase, mitochondrial OS=Homo sapiens GN=ALDH2 PE=1 SV=2
21		true	12994	1125.0419	1125.0414	2248.0682	2	0.45	7.19	67.77	79.2 (M:79.2)	5		1	0	K.TFPTVNPSTGEVICQVAEGDK.E	Carbamidomethyl: 14	CID	53 - 73	ALDH2_HUMAN	Aldehyde dehydrogenase, mitochondrial OS=Homo sapiens GN=ALDH2 PE=1 SV=2
22		true	12664	945.7834	945.7833	2834.3280	3	0.09	3.26	66.47	176.3 (M:176.3)	6		1	1	K.TFPTVNPSTGEVICQVAEGDKEDVDK.A	Carbamidomethyl: 14	CID	53 - 78	ALDH2_HUMAN	Aldehyde dehydrogenase, mitochondrial OS=Homo sapiens GN=ALDH2 PE=1 SV=2
23		true	14353	1439.1766	1439.1766	2876.3386	2	-0.01	7.68	73.11	66.3 (M:66.3)	18	99.46	1	1	K.TFPTVNPSTGEVICQVAEGDKEDVDK.A	Carbamidomethyl: 14; Acetyl: 21	CID	53 - 78	ALDH2_HUMAN	Aldehyde dehydrogenase, mitochondrial OS=Homo sapiens GN=ALDH2 PE=1 SV=2
25		true	13387	784.1392	784.1394	3132.5285	4	-0.23	6.34	69.24	75.5 (M:75.5)	2		1	2	K.TFPTVNPSTGEVICQVAEGDKEDVDKAVK.A	Carbamidomethyl: 14	CID	53 - 81	ALDH2_HUMAN	Aldehyde dehydrogenase, mitochondrial OS=Homo sapiens GN=ALDH2 PE=1 SV=2
26		true	13999	794.6420	794.6420	3174.5391	4	-0.09	4.84	71.80	60.3 (M:60.3)	17	51.86	1	2	K.TFPTVNPSTGEVICQVAEGDKEDVDKAVK.A	Carbamidomethyl: 14; Acetyl: 26	CID	53 - 81	ALDH2_HUMAN	Aldehyde dehydrogenase, mitochondrial OS=Homo sapiens GN=ALDH2 PE=1 SV=2
28		true	16338	1073.1909	1073.1905	3216.5496	3	0.36	4.47	81.18	54.1 (M:54.1)	11	89.16	1	2	K.TFPTVNPSTGEVICQVAEGDKEDVDKAVK.A	Carbamidomethyl: 14; Acetyl: 21, 26	CID	53 - 81	ALDH2_HUMAN	Aldehyde dehydrogenase, mitochondrial OS=Homo sapiens GN=ALDH2 PE=1 SV=2
29		true	16374	1074.1931	1074.1968	3219.5685	3	-3.40	4.11	81.29	17.9 (M:17.9)	1		1	2	K.TFPTVNPSTGEVICQVAEGDKEDVDKAVK.A	Carbamidomethyl: 14; Acetyl: 21; Acetyl:2H(3): 26	CID	53 - 81	ALDH2_HUMAN	Aldehyde dehydrogenase, mitochondrial OS=Homo sapiens GN=ALDH2 PE=1 SV=2
31		true	15533	869.1869	869.1859	3472.7144	4	1.17	4.27	77.75	50.4 (M:50.4)	8	93.78	1	3	K.TFPTVNPSTGEVICQVAEGDKEDVDKAVKAAR.A	Carbamidomethyl: 14; Acetyl: 29	CID	53 - 84	ALDH2_HUMAN	Aldehyde dehydrogenase, mitochondrial OS=Homo sapiens GN=ALDH2 PE=1 SV=2
32		true	18110	880.4419	880.4432	3517.7438	4	-1.53	10.03	89.84	14.6 (M:14.6)	1		1	3	K.TFPTVNPSTGEVICQVAEGDKEDVDKAVKAAR.A	Carbamidomethyl: 14; Acetyl: 29; Acetyl:2H(3): 21	CID	53 - 84	ALDH2_HUMAN	Aldehyde dehydrogenase, mitochondrial OS=Homo sapiens GN=ALDH2 PE=1 SV=2
33		true	16114	1172.5823	1172.5823	3514.7250	3	0.01	5.02	80.34	109.8 (M:109.8)	10	100.00	1	3	K.TFPTVNPSTGEVICQVAEGDKEDVDKAVKAAR.A	Carbamidomethyl: 14; Acetyl: 26, 29	CID	53 - 84	ALDH2_HUMAN	Aldehyde dehydrogenase, mitochondrial OS=Homo sapiens GN=ALDH2 PE=1 SV=2
34		true	18503	1186.5868	1186.5858	3556.7355	3	0.81	5.76	91.75	91.9 (M:91.9)	8		1	3	K.TFPTVNPSTGEVICQVAEGDKEDVDKAVKAAR.A	Carbamidomethyl: 14; Acetyl: 21, 26, 29	CID	53 - 84	ALDH2_HUMAN	Aldehyde dehydrogenase, mitochondrial OS=Homo sapiens GN=ALDH2 PE=1 SV=2
35		true	18504	1189.6046	1189.6046	3565.7920	3	-0.06	5.90	91.75	106.8 (M:106.8)	14		1	3	K.TFPTVNPSTGEVICQVAEGDKEDVDKAVKAAR.A	Carbamidomethyl: 14; Acetyl:2H(3): 21, 26, 29	CID	53 - 84	ALDH2_HUMAN	Aldehyde dehydrogenase, mitochondrial OS=Homo sapiens GN=ALDH2 PE=1 SV=2
36		true	12170	566.7972	566.7985	1131.5825	2	-2.29	1.83	64.57	28.3 (M:28.3)	4		1	0	R.AAFQLGSPWR.R		CID	85 - 94	ALDH2_HUMAN	Aldehyde dehydrogenase, mitochondrial OS=Homo sapiens GN=ALDH2 PE=1 SV=2
37		true	10346	430.2347	430.2352	1287.6836	3	-1.08	7.16	57.88	24.8 (M:24.8)	3		1	1	R.AAFQLGSPWRR.M		CID	85 - 95	ALDH2_HUMAN	Aldehyde dehydrogenase, mitochondrial OS=Homo sapiens GN=ALDH2 PE=1 SV=2
38		true	5239	487.2229	487.2243	972.4341	2	-2.94	7.08	38.75	15.9 (M:15.9)	1		1	0	R.YYAGWADK.Y		CID	148 - 155	ALDH2_HUMAN	Aldehyde dehydrogenase, mitochondrial OS=Homo sapiens GN=ALDH2 PE=1 SV=2
40		true	7684	500.9008	500.9017	1499.6834	3	-1.94	2.16	47.97	17.4 (M:17.4)	3		1	1	R.YYAGWADKYHGK.T	Acetyl: 8	CID	148 - 159	ALDH2_HUMAN	Aldehyde dehydrogenase, mitochondrial OS=Homo sapiens GN=ALDH2 PE=1 SV=2
41		true	7750	501.9068	501.9080	1502.7022	3	-2.45	3.37	48.23	29.5 (M:29.5)	4	95.72	1	1	R.YYAGWADKYHGK.T	Acetyl:2H(3): 8	CID	148 - 159	ALDH2_HUMAN	Aldehyde dehydrogenase, mitochondrial OS=Homo sapiens GN=ALDH2 PE=1 SV=2
42		true	15959	754.1093	754.1093	3012.4083	4	-0.09	2.06	79.67	45.1 (M:45.1)	11	75.46	1	2	R.YYAGWADKYHGKTIPIDGDFFSYTR.H	Acetyl: 12	CID	148 - 172	ALDH2_HUMAN	Aldehyde dehydrogenase, mitochondrial OS=Homo sapiens GN=ALDH2 PE=1 SV=2
44		true	17398	1019.1482	1019.1469	3054.4188	3	1.32	8.05	86.14	58.6 (M:58.6)	5		1	2	R.YYAGWADKYHGKTIPIDGDFFSYTR.H	Acetyl: 8, 12	CID	148 - 172	ALDH2_HUMAN	Aldehyde dehydrogenase, mitochondrial OS=Homo sapiens GN=ALDH2 PE=1 SV=2
45		true	17422	1021.1596	1021.1594	3060.4565	3	0.19	5.02	86.24	34.5 (M:34.5)	5		1	2	R.YYAGWADKYHGKTIPIDGDFFSYTR.H	Acetyl:2H(3): 8, 12	CID	148 - 172	ALDH2_HUMAN	Aldehyde dehydrogenase, mitochondrial OS=Homo sapiens GN=ALDH2 PE=1 SV=2
46		true	14706	687.0023	687.0022	2057.9847	3	0.18	1.92	74.51	49.1 (M:49.1)	8		1	1	K.YHGKTIPIDGDFFSYTR.H	Acetyl: 4	CID	156 - 172	ALDH2_HUMAN	Aldehyde dehydrogenase, mitochondrial OS=Homo sapiens GN=ALDH2 PE=1 SV=2
47		true	14992	766.3736	766.3750	1530.7355	2	-1.89	2.02	75.61	62.3 (M:62.3)	9		1	0	K.TIPIDGDFFSYTR.H		CID	160 - 172	ALDH2_HUMAN	Aldehyde dehydrogenase, mitochondrial OS=Homo sapiens GN=ALDH2 PE=1 SV=2
48		true	21285	907.4654	907.4662	2719.3767	3	-0.84	5.40	107.76	65.0 (M:65.0)	8		1	0	R.HEPVGVCGQIIPWNFPLLMQAWK.L	Carbamidomethyl: 7	CID	173 - 195	ALDH2_HUMAN	Aldehyde dehydrogenase, mitochondrial OS=Homo sapiens GN=ALDH2 PE=1 SV=2
49		true	20140	912.7980	912.7978	2735.3716	3	0.25	10.69	101.28	28.1 (M:28.1)	3		1	0	R.HEPVGVCGQIIPWNFPLLMQAWK.L	Carbamidomethyl: 7; Oxidation: 19	CID	173 - 195	ALDH2_HUMAN	Aldehyde dehydrogenase, mitochondrial OS=Homo sapiens GN=ALDH2 PE=1 SV=2
50		true	10421	685.3970	685.3972	1368.7799	2	-0.34	2.40	58.14	75.8 (M:75.8)	5		1	0	K.LGPALATGNVVVMK.V		CID	196 - 209	ALDH2_HUMAN	Aldehyde dehydrogenase, mitochondrial OS=Homo sapiens GN=ALDH2 PE=1 SV=2
51		true	8042	693.3937	693.3947	1384.7748	2	-1.40	9.55	49.39	40.8 (M:40.8)	4		1	0	K.LGPALATGNVVVMK.V	Oxidation: 13	CID	196 - 209	ALDH2_HUMAN	Aldehyde dehydrogenase, mitochondrial OS=Homo sapiens GN=ALDH2 PE=1 SV=2
52		true	18371	615.3557	615.3558	1843.0455	3	-0.16	1.69	91.13	83.3 (M:83.3)	7		1	0	K.VAEQTPLTALYVANLIK.E		CID	210 - 226	ALDH2_HUMAN	Aldehyde dehydrogenase, mitochondrial OS=Homo sapiens GN=ALDH2 PE=1 SV=2
53		true	17002	1007.1769	1007.1768	3018.5087	3	0.02	3.61	84.20	88.7 (M:88.7)	16		1	0	K.EAGFPPGVVNIVPGFGPTAGAAIASHEDVDK.V		CID	227 - 257	ALDH2_HUMAN	Aldehyde dehydrogenase, mitochondrial OS=Homo sapiens GN=ALDH2 PE=1 SV=2
54		true	17418	1035.2784	1035.2775	4137.0807	4	0.94	4.32	86.20	137.5 (M:137.5)	12		1	1	K.EAGFPPGVVNIVPGFGPTAGAAIASHEDVDKVAFTGSTEIGR.V		CID	227 - 268	ALDH2_HUMAN	Aldehyde dehydrogenase, mitochondrial OS=Homo sapiens GN=ALDH2 PE=1 SV=2
56		true	5744	569.2976	569.2986	1136.5826	2	-1.74	2.80	40.78	47.0 (M:47.0)	7		1	0	K.VAFTGSTEIGR.V		CID	258 - 268	ALDH2_HUMAN	Aldehyde dehydrogenase, mitochondrial OS=Homo sapiens GN=ALDH2 PE=1 SV=2
57		true	4283	593.8424	593.8431	1185.6717	2	-1.32	2.25	35.20	61.6 (M:61.6)	2		1	0	R.VIQVAAGSSNLK.R		CID	269 - 280	ALDH2_HUMAN	Aldehyde dehydrogenase, mitochondrial OS=Homo sapiens GN=ALDH2 PE=1 SV=2
58		true	3272	448.2635	448.2649	1341.7728	3	-3.11	8.88	31.29	70.2 (M:70.2)	8		1	1	R.VIQVAAGSSNLKR.V		CID	269 - 281	ALDH2_HUMAN	Aldehyde dehydrogenase, mitochondrial OS=Homo sapiens GN=ALDH2 PE=1 SV=2
59		true	5618	692.8982	692.8990	1383.7834	2	-1.14	1.92	40.31	48.3 (M:48.3)	6		1	1	R.VIQVAAGSSNLKR.V	Acetyl: 12	CID	269 - 281	ALDH2_HUMAN	Aldehyde dehydrogenase, mitochondrial OS=Homo sapiens GN=ALDH2 PE=1 SV=2
60		true	5555	694.4079	694.4084	1386.8022	2	-0.69	5.66	40.10	40.6 (M:40.6)	9		1	1	R.VIQVAAGSSNLKR.V	Acetyl:2H(3): 12	CID	269 - 281	ALDH2_HUMAN	Aldehyde dehydrogenase, mitochondrial OS=Homo sapiens GN=ALDH2 PE=1 SV=2
61		true	4595	486.7949	486.7955	971.5764	2	-1.10	4.45	36.39	35.0 (M:35.0)	2		1	1	K.RVTLELGGK.S		CID	281 - 289	ALDH2_HUMAN	Aldehyde dehydrogenase, mitochondrial OS=Homo sapiens GN=ALDH2 PE=1 SV=2
62		true	5347	408.7440	408.7449	815.4753	2	-2.35	12.19	39.21	13.3 (M:13.3)	1		1	0	R.VTLELGGK.S		CID	282 - 289	ALDH2_HUMAN	Aldehyde dehydrogenase, mitochondrial OS=Homo sapiens GN=ALDH2 PE=1 SV=2
63		true	15539	895.4172	895.4176	1788.8206	2	-0.40	2.38	77.76	85.5 (M:85.5)	17		1	0	R.TFVQEDIYDEFVER.S		CID	325 - 338	ALDH2_HUMAN	Aldehyde dehydrogenase, mitochondrial OS=Homo sapiens GN=ALDH2 PE=1 SV=2
64		true	5507	481.7499	481.7507	961.4869	2	-1.79	13.15	39.94	31.5 (M:31.5)	6		1	0	R.VVGNPFDSK.T		CID	347 - 355	ALDH2_HUMAN	Aldehyde dehydrogenase, mitochondrial OS=Homo sapiens GN=ALDH2 PE=1 SV=2
65		true	9570	817.3996	817.3993	2449.1761	3	0.29	5.16	55.04	79.1 (M:79.1)	3		1	1	R.VVGNPFDSKTEQGPQVDETQFK.K		CID	347 - 368	ALDH2_HUMAN	Aldehyde dehydrogenase, mitochondrial OS=Homo sapiens GN=ALDH2 PE=1 SV=2
66		true	11456	831.4029	831.4028	2491.1867	3	0.12	4.92	61.71	99.2 (M:99.2)	11		1	1	R.VVGNPFDSKTEQGPQVDETQFK.K	Acetyl: 9	CID	347 - 368	ALDH2_HUMAN	Aldehyde dehydrogenase, mitochondrial OS=Homo sapiens GN=ALDH2 PE=1 SV=2
67		true	8205	645.3256	645.3251	2577.2711	4	0.81	11.71	50.01	25.0 (M:25.0)	2		1	2	R.VVGNPFDSKTEQGPQVDETQFKK.I		CID	347 - 369	ALDH2_HUMAN	Aldehyde dehydrogenase, mitochondrial OS=Homo sapiens GN=ALDH2 PE=1 SV=2
68		true	9855	655.8277	655.8277	2619.2817	4	0.07	3.90	56.05	63.8 (M:63.8)	13		1	2	R.VVGNPFDSKTEQGPQVDETQFKK.I	Acetyl: 9	CID	347 - 369	ALDH2_HUMAN	Aldehyde dehydrogenase, mitochondrial OS=Homo sapiens GN=ALDH2 PE=1 SV=2
70		true	11528	667.8395	667.8397	2667.3299	4	-0.37	4.50	61.97	66.2 (M:66.2)	7	50.00	1	2	R.VVGNPFDSKTEQGPQVDETQFKK.I	Acetyl:2H(3): 9, 23	CID	347 - 369	ALDH2_HUMAN	Aldehyde dehydrogenase, mitochondrial OS=Homo sapiens GN=ALDH2 PE=1 SV=2
71		true	11465	888.1046	888.1047	2661.2922	3	-0.12	3.75	61.76	54.6 (M:54.6)	10	50.00	1	2	R.VVGNPFDSKTEQGPQVDETQFKK.I	Acetyl: 9, 23	CID	347 - 369	ALDH2_HUMAN	Aldehyde dehydrogenase, mitochondrial OS=Homo sapiens GN=ALDH2 PE=1 SV=2
72		true	19679	916.7183	916.7190	3662.8468	4	-0.76	9.69	98.57	33.3 (M:33.3)	2		1	3	R.VVGNPFDSKTEQGPQVDETQFKKILGYINTGK.Q	Acetyl: 9, 22, 23	CID	347 - 378	ALDH2_HUMAN	Aldehyde dehydrogenase, mitochondrial OS=Homo sapiens GN=ALDH2 PE=1 SV=2
73		true	19712	1224.9786	1224.9750	3671.9033	3	2.89	6.72	98.77	44.5 (M:44.5)	6		1	3	R.VVGNPFDSKTEQGPQVDETQFKKILGYINTGK.Q	Acetyl:2H(3): 9, 22, 23	CID	347 - 378	ALDH2_HUMAN	Aldehyde dehydrogenase, mitochondrial OS=Homo sapiens GN=ALDH2 PE=1 SV=2
74		true	4611	753.8570	753.8572	1505.6998	2	-0.25	4.62	36.44	78.5 (M:78.5)	9		1	0	K.TEQGPQVDETQFK.K		CID	356 - 368	ALDH2_HUMAN	Aldehyde dehydrogenase, mitochondrial OS=Homo sapiens GN=ALDH2 PE=1 SV=2
75		true	3398	545.6048	545.6055	1633.7948	3	-1.34	2.75	31.80	59.2 (M:59.2)	3		1	1	K.TEQGPQVDETQFKK.I		CID	356 - 369	ALDH2_HUMAN	Aldehyde dehydrogenase, mitochondrial OS=Homo sapiens GN=ALDH2 PE=1 SV=2
76		true	5619	838.9094	838.9099	1675.8053	2	-0.61	4.03	40.31	66.5 (M:66.5)	6	50.00	1	1	K.TEQGPQVDETQFKK.I	Acetyl: 13	CID	356 - 369	ALDH2_HUMAN	Aldehyde dehydrogenase, mitochondrial OS=Homo sapiens GN=ALDH2 PE=1 SV=2
77		true	5534	840.4185	840.4194	1678.8242	2	-1.07	4.11	40.04	71.2 (M:71.2)	5	50.00	1	1	K.TEQGPQVDETQFKK.I	Acetyl:2H(3): 13	CID	356 - 369	ALDH2_HUMAN	Aldehyde dehydrogenase, mitochondrial OS=Homo sapiens GN=ALDH2 PE=1 SV=2
78		true	18664	893.4606	893.4606	2677.3599	3	-0.03	2.59	92.66	56.3 (M:56.3)	8	99.98	1	2	K.TEQGPQVDETQFKKILGYINTGK.Q	Acetyl: 13, 14	CID	356 - 378	ALDH2_HUMAN	Aldehyde dehydrogenase, mitochondrial OS=Homo sapiens GN=ALDH2 PE=1 SV=2
81		true	18677	895.4734	895.4731	2683.3976	3	0.25	2.44	92.71	84.7 (M:84.7)	8	100.00	1	2	K.TEQGPQVDETQFKKILGYINTGK.Q	Acetyl:2H(3): 13, 14	CID	356 - 378	ALDH2_HUMAN	Aldehyde dehydrogenase, mitochondrial OS=Homo sapiens GN=ALDH2 PE=1 SV=2
82		true	17291	800.1726	800.1703	3196.6523	4	2.75	9.61	85.63	15.8 (M:15.8)	1		1	3	K.TEQGPQVDETQFKKILGYINTGKQEGAK.L	Acetyl:2H(3): 13, 14	CID	356 - 383	ALDH2_HUMAN	Aldehyde dehydrogenase, mitochondrial OS=Homo sapiens GN=ALDH2 PE=1 SV=2
83		true	18410	1078.5485	1078.5490	3232.6252	3	-0.43	6.92	91.29	46.2 (M:46.2)	8	98.11	1	3	K.TEQGPQVDETQFKKILGYINTGKQEGAK.L	Acetyl: 13, 14, 23	CID	356 - 383	ALDH2_HUMAN	Aldehyde dehydrogenase, mitochondrial OS=Homo sapiens GN=ALDH2 PE=1 SV=2
84		true	18396	1081.5675	1081.5678	3241.6817	3	-0.32	4.71	91.23	69.1 (M:69.1)	11	97.95	1	3	K.TEQGPQVDETQFKKILGYINTGKQEGAK.L	Acetyl:2H(3): 13, 14, 23	CID	356 - 383	ALDH2_HUMAN	Aldehyde dehydrogenase, mitochondrial OS=Homo sapiens GN=ALDH2 PE=1 SV=2
85		true	5775	553.8313	553.8320	1105.6495	2	-1.44	4.32	40.89	13.2 (M:13.2)	1		1	1	K.KILGYINTGK.Q		CID	369 - 378	ALDH2_HUMAN	Aldehyde dehydrogenase, mitochondrial OS=Homo sapiens GN=ALDH2 PE=1 SV=2
86		true	8871	574.8371	574.8373	1147.6601	2	-0.49	2.01	52.47	15.9 (M:15.9)	1		1	1	K.KILGYINTGK.Q	Acetyl: 1	CID	369 - 378	ALDH2_HUMAN	Aldehyde dehydrogenase, mitochondrial OS=Homo sapiens GN=ALDH2 PE=1 SV=2
87		true	8884	576.3466	576.3467	1150.6789	2	-0.18	1.70	52.53	21.8 (M:21.8)	3		1	1	K.KILGYINTGK.Q	Acetyl:2H(3): 1	CID	369 - 378	ALDH2_HUMAN	Aldehyde dehydrogenase, mitochondrial OS=Homo sapiens GN=ALDH2 PE=1 SV=2
88		true	6974	554.6451	554.6456	1660.9148	3	-0.79	3.80	45.46	21.2 (M:21.2)	1		1	2	K.KILGYINTGKQEGAK.L	Acetyl: 10	CID	369 - 383	ALDH2_HUMAN	Aldehyde dehydrogenase, mitochondrial OS=Homo sapiens GN=ALDH2 PE=1 SV=2
90		true	9660	852.4691	852.4700	1702.9254	2	-1.00	3.66	55.36	48.2 (M:48.2)	6	97.51	1	2	K.KILGYINTGKQEGAK.L	Acetyl: 1, 10	CID	369 - 383	ALDH2_HUMAN	Aldehyde dehydrogenase, mitochondrial OS=Homo sapiens GN=ALDH2 PE=1 SV=2
91		true	9563	855.4886	855.4888	1708.9630	2	-0.29	5.14	55.00	34.9 (M:34.9)	6	98.06	1	2	K.KILGYINTGKQEGAK.L	Acetyl:2H(3): 1, 10	CID	369 - 383	ALDH2_HUMAN	Aldehyde dehydrogenase, mitochondrial OS=Homo sapiens GN=ALDH2 PE=1 SV=2
93		true	15203	929.8328	929.8322	2786.4749	3	0.57	7.15	76.55	78.9 (M:78.9)	2	99.93	1	3	K.KILGYINTGKQEGAKLLCGGGIAADR.G	Carbamidomethyl: 18; Acetyl: 10, 15	CID	369 - 394	ALDH2_HUMAN	Aldehyde dehydrogenase, mitochondrial OS=Homo sapiens GN=ALDH2 PE=1 SV=2
94		true	15195	931.8455	931.8448	2792.5126	3	0.80	9.48	76.50	27.5 (M:27.5)	2	55.27	1	3	K.KILGYINTGKQEGAKLLCGGGIAADR.G	Carbamidomethyl: 18; Acetyl:2H(3): 10, 15	CID	369 - 394	ALDH2_HUMAN	Aldehyde dehydrogenase, mitochondrial OS=Homo sapiens GN=ALDH2 PE=1 SV=2
96		true	17084	943.8353	943.8358	2828.4855	3	-0.48	3.48	84.59	104.9 (M:104.9)	6		1	3	K.KILGYINTGKQEGAKLLCGGGIAADR.G	Carbamidomethyl: 18; Acetyl: 1, 10, 15	CID	369 - 394	ALDH2_HUMAN	Aldehyde dehydrogenase, mitochondrial OS=Homo sapiens GN=ALDH2 PE=1 SV=2
97		true	17037	946.8540	946.8546	2837.5420	3	-0.66	4.83	84.39	98.5 (M:98.5)	6		1	3	K.KILGYINTGKQEGAKLLCGGGIAADR.G	Carbamidomethyl: 18; Acetyl:2H(3): 1, 10, 15	CID	369 - 394	ALDH2_HUMAN	Aldehyde dehydrogenase, mitochondrial OS=Homo sapiens GN=ALDH2 PE=1 SV=2
98		true	6644	489.7843	489.7846	977.5546	2	-0.61	1.78	44.21	21.4 (M:21.4)	2		1	0	K.ILGYINTGK.Q		CID	370 - 378	ALDH2_HUMAN	Aldehyde dehydrogenase, mitochondrial OS=Homo sapiens GN=ALDH2 PE=1 SV=2
100		true	7633	767.4168	767.4172	1532.8199	2	-0.57	5.79	47.77	35.7 (M:35.7)	7	99.21	1	1	K.ILGYINTGKQEGAK.L	Acetyl: 9	CID	370 - 383	ALDH2_HUMAN	Aldehyde dehydrogenase, mitochondrial OS=Homo sapiens GN=ALDH2 PE=1 SV=2
101		true	7857	768.9251	768.9266	1535.8387	2	-2.04	2.07	48.65	44.2 (M:44.2)	8	99.22	1	1	K.ILGYINTGKQEGAK.L	Acetyl:2H(3): 9	CID	370 - 383	ALDH2_HUMAN	Aldehyde dehydrogenase, mitochondrial OS=Homo sapiens GN=ALDH2 PE=1 SV=2
102		true	13491	873.1299	873.1304	2616.3694	3	-0.57	6.50	69.66	39.6 (M:39.6)	4	50.00	1	2	K.ILGYINTGKQEGAKLLCGGGIAADR.G	Carbamidomethyl: 17; Acetyl: 9	CID	370 - 394	ALDH2_HUMAN	Aldehyde dehydrogenase, mitochondrial OS=Homo sapiens GN=ALDH2 PE=1 SV=2
103		true	13502	873.1312	873.1304	2616.3694	3	0.89	7.80	69.71	39.9 (M:39.9)	4	96.50	1	2	K.ILGYINTGKQEGAKLLCGGGIAADR.G	Carbamidomethyl: 17; Acetyl: 14	CID	370 - 394	ALDH2_HUMAN	Aldehyde dehydrogenase, mitochondrial OS=Homo sapiens GN=ALDH2 PE=1 SV=2
104		true	15927	889.1460	889.1465	2664.4176	3	-0.57	3.83	79.52	107.7 (M:107.7)	13		1	2	K.ILGYINTGKQEGAKLLCGGGIAADR.G	Carbamidomethyl: 17; Acetyl:2H(3): 9, 14	CID	370 - 394	ALDH2_HUMAN	Aldehyde dehydrogenase, mitochondrial OS=Homo sapiens GN=ALDH2 PE=1 SV=2
105		true	15920	1330.1968	1330.1972	2658.3799	2	-0.37	5.29	79.51	172.2 (M:172.2)	7		1	2	K.ILGYINTGKQEGAKLLCGGGIAADR.G	Carbamidomethyl: 17; Acetyl: 9, 14	CID	370 - 394	ALDH2_HUMAN	Aldehyde dehydrogenase, mitochondrial OS=Homo sapiens GN=ALDH2 PE=1 SV=2
106		true	8826	829.4197	829.4200	1656.8254	2	-0.26	3.17	52.32	71.3 (M:71.3)	4		1	1	K.QEGAKLLCGGGIAADR.G	Carbamidomethyl: 8; Acetyl: 5	CID	379 - 394	ALDH2_HUMAN	Aldehyde dehydrogenase, mitochondrial OS=Homo sapiens GN=ALDH2 PE=1 SV=2
107		true	8796	830.9287	830.9294	1659.8442	2	-0.82	3.21	52.21	56.3 (M:56.3)	2		1	1	K.QEGAKLLCGGGIAADR.G	Carbamidomethyl: 8; Acetyl:2H(3): 5	CID	379 - 394	ALDH2_HUMAN	Aldehyde dehydrogenase, mitochondrial OS=Homo sapiens GN=ALDH2 PE=1 SV=2
108		true	4573	551.7865	551.7873	1101.5601	2	-1.44	2.27	36.34	56.1 (M:56.1)	4		1	0	K.LLCGGGIAADR.G	Carbamidomethyl: 3	CID	384 - 394	ALDH2_HUMAN	Aldehyde dehydrogenase, mitochondrial OS=Homo sapiens GN=ALDH2 PE=1 SV=2
109		true	15051	735.0286	735.0295	2202.0667	3	-1.21	8.42	75.83	58.6 (M:58.6)	6		1	0	R.GYFIQPTVFGDVQDGMTIAK.E	Oxidation: 16	CID	395 - 414	ALDH2_HUMAN	Aldehyde dehydrogenase, mitochondrial OS=Homo sapiens GN=ALDH2 PE=1 SV=2
110		true	16900	1094.0434	1094.0432	2186.0718	2	0.17	5.31	83.77	75.9 (M:75.9)	10		1	0	R.GYFIQPTVFGDVQDGMTIAK.E		CID	395 - 414	ALDH2_HUMAN	Aldehyde dehydrogenase, mitochondrial OS=Homo sapiens GN=ALDH2 PE=1 SV=2
111		true	18044	702.3838	702.3838	1402.7530	2	-0.05	3.65	89.52	23.3 (M:23.3)	4		1	0	K.EEIFGPVMQILK.F		CID	415 - 426	ALDH2_HUMAN	Aldehyde dehydrogenase, mitochondrial OS=Homo sapiens GN=ALDH2 PE=1 SV=2
113		true	20717	860.9692	860.9708	1719.9270	2	-1.79	6.18	104.76	24.2 (M:24.2)	3	75.49	1	1	K.EEIFGPVMQILKFK.T	Acetyl: 12	CID	415 - 428	ALDH2_HUMAN	Aldehyde dehydrogenase, mitochondrial OS=Homo sapiens GN=ALDH2 PE=1 SV=2
114		true	20656	860.9715	860.9708	1719.9270	2	0.86	6.14	104.40	22.2 (M:22.2)	2	50.00	1	1	K.EEIFGPVMQILKFK.T	Acetyl: 14	CID	415 - 428	ALDH2_HUMAN	Aldehyde dehydrogenase, mitochondrial OS=Homo sapiens GN=ALDH2 PE=1 SV=2
115		true	8246	589.3314	589.3324	1176.6503	2	-1.80	3.02	50.16	30.3 (M:30.3)	3		1	1	K.FKTIEEVVGR.A		CID	427 - 436	ALDH2_HUMAN	Aldehyde dehydrogenase, mitochondrial OS=Homo sapiens GN=ALDH2 PE=1 SV=2
116		true	11381	610.3367	610.3377	1218.6608	2	-1.71	1.91	61.50	24.1 (M:24.1)	2		1	1	K.FKTIEEVVGR.A	Acetyl: 2	CID	427 - 436	ALDH2_HUMAN	Aldehyde dehydrogenase, mitochondrial OS=Homo sapiens GN=ALDH2 PE=1 SV=2
117		true	11396	611.8457	611.8471	1221.6797	2	-2.29	1.52	61.55	45.0 (M:45.0)	6		1	1	K.FKTIEEVVGR.A	Acetyl:2H(3): 2	CID	427 - 436	ALDH2_HUMAN	Aldehyde dehydrogenase, mitochondrial OS=Homo sapiens GN=ALDH2 PE=1 SV=2
118		true	3908	451.7495	451.7507	901.4869	2	-2.67	3.41	33.73	13.6 (M:13.6)	1		1	0	K.TIEEVVGR.A		CID	429 - 436	ALDH2_HUMAN	Aldehyde dehydrogenase, mitochondrial OS=Homo sapiens GN=ALDH2 PE=1 SV=2
119		true	12808	764.3926	764.3937	1526.7729	2	-1.45	1.78	67.00	112.7 (M:112.7)	12		1	0	R.ANNSTYGLAAAVFTK.D		CID	437 - 451	ALDH2_HUMAN	Aldehyde dehydrogenase, mitochondrial OS=Homo sapiens GN=ALDH2 PE=1 SV=2
121		true	16571	682.0182	682.0190	2043.0352	3	-1.19	6.99	82.17	25.9 (M:25.9)	1	91.89	1	1	R.ANNSTYGLAAAVFTKDLDK.A	Acetyl:2H(3): 15	CID	437 - 455	ALDH2_HUMAN	Aldehyde dehydrogenase, mitochondrial OS=Homo sapiens GN=ALDH2 PE=1 SV=2
122		true	16612	1021.0164	1021.0155	2040.0164	2	0.95	7.47	82.32	46.1 (M:46.1)	5	99.02	1	1	R.ANNSTYGLAAAVFTKDLDK.A	Acetyl: 15	CID	437 - 455	ALDH2_HUMAN	Aldehyde dehydrogenase, mitochondrial OS=Homo sapiens GN=ALDH2 PE=1 SV=2
123		true	11234	800.3978	800.3987	1598.7828	2	-1.13	5.12	61.02	61.7 (M:61.7)	8		1	0	R.ELGEYGLQAYTEVK.T		CID	493 - 506	ALDH2_HUMAN	Aldehyde dehydrogenase, mitochondrial OS=Homo sapiens GN=ALDH2 PE=1 SV=2
124		true	15501	724.0466	724.0474	2169.1205	3	-1.21	4.30	77.65	38.2 (M:38.2)	1	93.45	1	1	R.ELGEYGLQAYTEVKTVTVK.V	Acetyl: 14	CID	493 - 511	ALDH2_HUMAN	Aldehyde dehydrogenase, mitochondrial OS=Homo sapiens GN=ALDH2 PE=1 SV=2
125		true	15497	725.0529	725.0537	2172.1393	3	-1.11	4.46	77.65	35.8 (M:35.8)	1	95.11	1	1	R.ELGEYGLQAYTEVKTVTVK.V	Acetyl:2H(3): 14	CID	493 - 511	ALDH2_HUMAN	Aldehyde dehydrogenase, mitochondrial OS=Homo sapiens GN=ALDH2 PE=1 SV=2
126		true	13120	645.8533	645.8534	2579.3847	4	-0.22	13.65	68.21	24.4 (M:24.4)	2		1	2	R.ELGEYGLQAYTEVKTVTVKVPQK.N		CID	493 - 515	ALDH2_HUMAN	Aldehyde dehydrogenase, mitochondrial OS=Homo sapiens GN=ALDH2 PE=1 SV=2
128		true	16846	969.8373	969.8377	2906.4913	3	-0.43	6.92	83.52	19.2 (M:19.2)	1		1	3	R.ELGEYGLQAYTEVKTVTVKVPQKNS.-	Acetyl: 14, 19, 23	CID	493 - 517	ALDH2_HUMAN	Aldehyde dehydrogenase, mitochondrial OS=Homo sapiens GN=ALDH2 PE=1 SV=2
129		true	3760	521.3180	521.3188	1040.6230	2	-1.47	1.60	33.16	18.5 (M:18.5)	3		1	1	K.TVTVKVPQK.N	Acetyl: 5	CID	507 - 515	ALDH2_HUMAN	Aldehyde dehydrogenase, mitochondrial OS=Homo sapiens GN=ALDH2 PE=1 SV=2
130		true	3804	522.8271	522.8282	1043.6418	2	-2.16	3.74	33.32	18.7 (M:18.7)	4		1	1	K.TVTVKVPQK.N	Acetyl:2H(3): 5	CID	507 - 515	ALDH2_HUMAN	Aldehyde dehydrogenase, mitochondrial OS=Homo sapiens GN=ALDH2 PE=1 SV=2

## Sheet: Sample 6
Row	User Flag	OK	Cmpd.	m/z meas.	m/z calc.	Mr calc.	z	Δ m/z [ppm]	RMS90 [ppm]	Rt [min]	Scores	#Cmpds.	Site [%]	Rank	P	Sequence	Modifications	Type	Range	Accession	Protein
1		true	11136	793.0617	793.0617	2376.1631	3	-0.00	8.25	60.63	66.2 (M:66.2)	2		1	1	R.KTFPTVNPSTGEVICQVAEGDK.E	Carbamidomethyl: 15	CID	52 - 73	ALDH2_HUMAN	Aldehyde dehydrogenase, mitochondrial OS=Homo sapiens GN=ALDH2 PE=1 SV=2
2		true	10950	741.6134	741.6130	2962.4230	4	0.47	3.82	59.99	152.5 (M:152.5)	8		1	2	R.KTFPTVNPSTGEVICQVAEGDKEDVDK.A	Carbamidomethyl: 15	CID	52 - 78	ALDH2_HUMAN	Aldehyde dehydrogenase, mitochondrial OS=Homo sapiens GN=ALDH2 PE=1 SV=2
3		true	12744	1002.4850	1002.4851	3004.4335	3	-0.14	4.97	66.88	70.4 (M:70.4)	12	99.38	1	2	R.KTFPTVNPSTGEVICQVAEGDKEDVDK.A	Carbamidomethyl: 15; Acetyl: 22	CID	52 - 78	ALDH2_HUMAN	Aldehyde dehydrogenase, mitochondrial OS=Homo sapiens GN=ALDH2 PE=1 SV=2
4		true	12902	1002.4854	1002.4851	3004.4335	3	0.29	3.85	67.55	152.5 (M:152.5)	9		1	2	R.KTFPTVNPSTGEVICQVAEGDKEDVDK.A	Carbamidomethyl: 15; Acetyl: 1	CID	52 - 78	ALDH2_HUMAN	Aldehyde dehydrogenase, mitochondrial OS=Homo sapiens GN=ALDH2 PE=1 SV=2
5		true	14475	1016.4896	1016.4886	3046.4441	3	0.94	6.45	73.85	55.5 (M:55.5)	4	99.40	1	2	R.KTFPTVNPSTGEVICQVAEGDKEDVDK.A	Carbamidomethyl: 15; Acetyl: 1, 22	CID	52 - 78	ALDH2_HUMAN	Aldehyde dehydrogenase, mitochondrial OS=Homo sapiens GN=ALDH2 PE=1 SV=2
6		true	14511	1017.4920	1017.4949	3049.4629	3	-2.91	9.78	73.97	60.7 (M:60.7)	1	99.39	1	2	R.KTFPTVNPSTGEVICQVAEGDKEDVDK.A	Carbamidomethyl: 15; Acetyl: 1; Acetyl:2H(3): 22	CID	52 - 78	ALDH2_HUMAN	Aldehyde dehydrogenase, mitochondrial OS=Homo sapiens GN=ALDH2 PE=1 SV=2
7		true	14495	1018.5015	1018.5012	3052.4818	3	0.26	5.68	73.91	67.1 (M:67.1)	5	99.59	1	2	R.KTFPTVNPSTGEVICQVAEGDKEDVDK.A	Carbamidomethyl: 15; Acetyl:2H(3): 1, 22	CID	52 - 78	ALDH2_HUMAN	Aldehyde dehydrogenase, mitochondrial OS=Homo sapiens GN=ALDH2 PE=1 SV=2
8		true	11985	653.1321	653.1320	3260.6235	5	0.18	3.47	63.86	152.5 (M:152.5)	8		1	3	R.KTFPTVNPSTGEVICQVAEGDKEDVDKAVK.A	Carbamidomethyl: 15	CID	52 - 81	ALDH2_HUMAN	Aldehyde dehydrogenase, mitochondrial OS=Homo sapiens GN=ALDH2 PE=1 SV=2
10		true	12557	826.6659	826.6658	3302.6340	4	0.08	5.41	66.15	40.6 (M:40.6)	17	62.00	1	3	R.KTFPTVNPSTGEVICQVAEGDKEDVDKAVK.A	Carbamidomethyl: 15; Acetyl: 27	CID	52 - 81	ALDH2_HUMAN	Aldehyde dehydrogenase, mitochondrial OS=Homo sapiens GN=ALDH2 PE=1 SV=2
11		true	14525	826.6660	826.6658	3302.6340	4	0.22	10.46	74.05	48.1 (M:48.1)	18	96.26	1	3	R.KTFPTVNPSTGEVICQVAEGDKEDVDKAVK.A	Carbamidomethyl: 15; Acetyl: 22	CID	52 - 81	ALDH2_HUMAN	Aldehyde dehydrogenase, mitochondrial OS=Homo sapiens GN=ALDH2 PE=1 SV=2
12		true	15892	838.6767	838.6778	3350.6823	4	-1.42	4.79	79.78	85.9 (M:85.9)	5	33.33	1	3	R.KTFPTVNPSTGEVICQVAEGDKEDVDKAVK.A	Carbamidomethyl: 15; Acetyl:2H(3): 1, 22	CID	52 - 81	ALDH2_HUMAN	Aldehyde dehydrogenase, mitochondrial OS=Homo sapiens GN=ALDH2 PE=1 SV=2
13		true	16316	847.6708	847.6711	3386.6552	4	-0.38	7.31	81.58	47.5 (M:47.5)	7	90.32	1	3	R.KTFPTVNPSTGEVICQVAEGDKEDVDKAVK.A	Carbamidomethyl: 15; Acetyl: 1, 22, 27	CID	52 - 81	ALDH2_HUMAN	Aldehyde dehydrogenase, mitochondrial OS=Homo sapiens GN=ALDH2 PE=1 SV=2
14		true	14188	1115.8897	1115.8888	3344.6446	3	0.82	6.59	72.70	150.2 (M:150.2)	5	50.00	1	3	R.KTFPTVNPSTGEVICQVAEGDKEDVDKAVK.A	Carbamidomethyl: 15; Acetyl: 1, 27	CID	52 - 81	ALDH2_HUMAN	Aldehyde dehydrogenase, mitochondrial OS=Homo sapiens GN=ALDH2 PE=1 SV=2
15		true	14868	1115.8901	1115.8888	3344.6446	3	1.18	5.69	75.46	102.9 (M:102.9)	14	98.76	1	3	R.KTFPTVNPSTGEVICQVAEGDKEDVDKAVK.A	Carbamidomethyl: 15; Acetyl: 22, 27	CID	52 - 81	ALDH2_HUMAN	Aldehyde dehydrogenase, mitochondrial OS=Homo sapiens GN=ALDH2 PE=1 SV=2
16		true	14878	1116.8926	1116.8951	3347.6634	3	-2.24	7.99	75.47	27.3 (M:27.3)	2	44.81	1	3	R.KTFPTVNPSTGEVICQVAEGDKEDVDKAVK.A	Carbamidomethyl: 15; Acetyl: 27; Acetyl:2H(3): 22	CID	52 - 81	ALDH2_HUMAN	Aldehyde dehydrogenase, mitochondrial OS=Homo sapiens GN=ALDH2 PE=1 SV=2
17		true	14175	1116.8926	1116.8951	3347.6634	3	-2.19	10.11	72.65	59.1 (M:59.1)	4	35.64	1	3	R.KTFPTVNPSTGEVICQVAEGDKEDVDKAVK.A	Carbamidomethyl: 15; Acetyl: 30; Acetyl:2H(3): 1	CID	52 - 81	ALDH2_HUMAN	Aldehyde dehydrogenase, mitochondrial OS=Homo sapiens GN=ALDH2 PE=1 SV=2
18		true	14180	1116.8926	1116.8951	3347.6634	3	-2.19	4.57	72.66	59.1 (M:59.1)	3	49.68	1	3	R.KTFPTVNPSTGEVICQVAEGDKEDVDKAVK.A	Carbamidomethyl: 15; Acetyl: 1; Acetyl:2H(3): 27	CID	52 - 81	ALDH2_HUMAN	Aldehyde dehydrogenase, mitochondrial OS=Homo sapiens GN=ALDH2 PE=1 SV=2
19		true	14816	1117.8997	1117.9014	3350.6823	3	-1.51	8.73	75.26	47.3 (M:47.3)	2	91.50	1	3	R.KTFPTVNPSTGEVICQVAEGDKEDVDKAVK.A	Carbamidomethyl: 15; Acetyl:2H(3): 22, 27	CID	52 - 81	ALDH2_HUMAN	Aldehyde dehydrogenase, mitochondrial OS=Homo sapiens GN=ALDH2 PE=1 SV=2
21		true	16315	1132.9109	1132.9112	3395.7117	3	-0.25	6.52	81.58	84.5 (M:84.5)	13	96.60	1	3	R.KTFPTVNPSTGEVICQVAEGDKEDVDKAVK.A	Carbamidomethyl: 15; Acetyl:2H(3): 1, 22, 27	CID	52 - 81	ALDH2_HUMAN	Aldehyde dehydrogenase, mitochondrial OS=Homo sapiens GN=ALDH2 PE=1 SV=2
23		true	12962	750.3647	750.3633	2248.0682	3	1.77	7.83	67.77	48.1 (M:48.1)	4		1	0	K.TFPTVNPSTGEVICQVAEGDK.E	Carbamidomethyl: 14	CID	53 - 73	ALDH2_HUMAN	Aldehyde dehydrogenase, mitochondrial OS=Homo sapiens GN=ALDH2 PE=1 SV=2
24		true	12629	945.7832	945.7833	2834.3280	3	-0.10	4.89	66.41	152.5 (M:152.5)	5		1	1	K.TFPTVNPSTGEVICQVAEGDKEDVDK.A	Carbamidomethyl: 14	CID	53 - 78	ALDH2_HUMAN	Aldehyde dehydrogenase, mitochondrial OS=Homo sapiens GN=ALDH2 PE=1 SV=2
25		true	14335	1439.1765	1439.1766	2876.3386	2	-0.07	9.48	73.24	105.4 (M:105.4)	11	99.90	1	1	K.TFPTVNPSTGEVICQVAEGDKEDVDK.A	Carbamidomethyl: 14; Acetyl: 21	CID	53 - 78	ALDH2_HUMAN	Aldehyde dehydrogenase, mitochondrial OS=Homo sapiens GN=ALDH2 PE=1 SV=2
26		true	13362	784.1397	784.1394	3132.5285	4	0.39	6.63	69.33	151.5 (M:151.5)	4		1	2	K.TFPTVNPSTGEVICQVAEGDKEDVDKAVK.A	Carbamidomethyl: 14	CID	53 - 81	ALDH2_HUMAN	Aldehyde dehydrogenase, mitochondrial OS=Homo sapiens GN=ALDH2 PE=1 SV=2
27		true	16228	805.1439	805.1447	3216.5496	4	-0.93	5.63	81.22	74.8 (M:74.8)	14	50.00	1	2	K.TFPTVNPSTGEVICQVAEGDKEDVDKAVK.A	Carbamidomethyl: 14; Acetyl: 21, 29	CID	53 - 81	ALDH2_HUMAN	Aldehyde dehydrogenase, mitochondrial OS=Homo sapiens GN=ALDH2 PE=1 SV=2
28		true	13955	1059.1881	1059.1870	3174.5391	3	1.04	3.84	71.81	152.5 (M:152.5)	14	33.33	1	2	K.TFPTVNPSTGEVICQVAEGDKEDVDKAVK.A	Carbamidomethyl: 14; Acetyl: 21	CID	53 - 81	ALDH2_HUMAN	Aldehyde dehydrogenase, mitochondrial OS=Homo sapiens GN=ALDH2 PE=1 SV=2
30		true	15486	869.1857	869.1859	3472.7144	4	-0.26	4.26	77.86	103.9 (M:103.9)	9	99.88	1	3	K.TFPTVNPSTGEVICQVAEGDKEDVDKAVKAAR.A	Carbamidomethyl: 14; Acetyl: 29	CID	53 - 84	ALDH2_HUMAN	Aldehyde dehydrogenase, mitochondrial OS=Homo sapiens GN=ALDH2 PE=1 SV=2
33		true	18342	892.4552	892.4553	3565.7920	4	-0.13	6.24	91.84	89.0 (M:89.0)	8		1	3	K.TFPTVNPSTGEVICQVAEGDKEDVDKAVKAAR.A	Carbamidomethyl: 14; Acetyl:2H(3): 21, 26, 29	CID	53 - 84	ALDH2_HUMAN	Aldehyde dehydrogenase, mitochondrial OS=Homo sapiens GN=ALDH2 PE=1 SV=2
34		true	16005	1172.5815	1172.5823	3514.7250	3	-0.66	4.12	80.33	152.5 (M:152.5)	17	100.00	1	3	K.TFPTVNPSTGEVICQVAEGDKEDVDKAVKAAR.A	Carbamidomethyl: 14; Acetyl: 26, 29	CID	53 - 84	ALDH2_HUMAN	Aldehyde dehydrogenase, mitochondrial OS=Homo sapiens GN=ALDH2 PE=1 SV=2
35		true	18336	1186.5869	1186.5858	3556.7355	3	0.94	5.96	91.84	152.5 (M:152.5)	13		1	3	K.TFPTVNPSTGEVICQVAEGDKEDVDKAVKAAR.A	Carbamidomethyl: 14; Acetyl: 21, 26, 29	CID	53 - 84	ALDH2_HUMAN	Aldehyde dehydrogenase, mitochondrial OS=Homo sapiens GN=ALDH2 PE=1 SV=2
36		true	12136	566.7979	566.7985	1131.5825	2	-1.13	1.97	64.44	44.1 (M:44.1)	6		1	0	R.AAFQLGSPWR.R		CID	85 - 94	ALDH2_HUMAN	Aldehyde dehydrogenase, mitochondrial OS=Homo sapiens GN=ALDH2 PE=1 SV=2
37		true	10319	430.2352	430.2352	1287.6836	3	0.06	2.93	57.78	26.2 (M:26.2)	3		1	1	R.AAFQLGSPWRR.M		CID	85 - 95	ALDH2_HUMAN	Aldehyde dehydrogenase, mitochondrial OS=Homo sapiens GN=ALDH2 PE=1 SV=2
38		true	4546	367.5396	367.5401	1099.5986	3	-1.45	24.68	36.37	37.3 (M:37.3)	2		1	1	R.LADLIERDR.T		CID	108 - 116	ALDH2_HUMAN	Aldehyde dehydrogenase, mitochondrial OS=Homo sapiens GN=ALDH2 PE=1 SV=2
39		true	5171	487.2235	487.2243	972.4341	2	-1.81	3.47	38.66	28.2 (M:28.2)	6		1	0	R.YYAGWADK.Y		CID	148 - 155	ALDH2_HUMAN	Aldehyde dehydrogenase, mitochondrial OS=Homo sapiens GN=ALDH2 PE=1 SV=2
40		true	4500	365.4251	365.4255	1457.6728	4	-1.00	2.18	36.22	72.7 (M:72.7)	4		1	1	R.YYAGWADKYHGK.T		CID	148 - 159	ALDH2_HUMAN	Aldehyde dehydrogenase, mitochondrial OS=Homo sapiens GN=ALDH2 PE=1 SV=2
41		true	7652	500.9012	500.9017	1499.6834	3	-1.02	3.68	48.03	36.9 (M:36.9)	5	97.91	1	1	R.YYAGWADKYHGK.T	Acetyl: 8	CID	148 - 159	ALDH2_HUMAN	Aldehyde dehydrogenase, mitochondrial OS=Homo sapiens GN=ALDH2 PE=1 SV=2
42		true	15859	754.1091	754.1093	3012.4083	4	-0.35	1.86	79.67	80.0 (M:80.0)	8	50.00	1	2	R.YYAGWADKYHGKTIPIDGDFFSYTR.H	Acetyl: 8	CID	148 - 172	ALDH2_HUMAN	Aldehyde dehydrogenase, mitochondrial OS=Homo sapiens GN=ALDH2 PE=1 SV=2
43		true	17270	1019.1475	1019.1469	3054.4188	3	0.56	4.50	86.26	152.5 (M:152.5)	11		1	2	R.YYAGWADKYHGKTIPIDGDFFSYTR.H	Acetyl: 8, 12	CID	148 - 172	ALDH2_HUMAN	Aldehyde dehydrogenase, mitochondrial OS=Homo sapiens GN=ALDH2 PE=1 SV=2
44		true	14653	687.0023	687.0022	2057.9847	3	0.21	2.17	74.58	119.2 (M:119.2)	7		1	1	K.YHGKTIPIDGDFFSYTR.H	Acetyl: 4	CID	156 - 172	ALDH2_HUMAN	Aldehyde dehydrogenase, mitochondrial OS=Homo sapiens GN=ALDH2 PE=1 SV=2
45		true	14885	766.3750	766.3750	1530.7355	2	0.02	1.63	75.51	101.7 (M:101.7)	8		1	0	K.TIPIDGDFFSYTR.H		CID	160 - 172	ALDH2_HUMAN	Aldehyde dehydrogenase, mitochondrial OS=Homo sapiens GN=ALDH2 PE=1 SV=2
46		true	21202	680.8499	680.8515	2719.3767	4	-2.27	5.09	108.11	106.5 (M:106.5)	10		1	0	R.HEPVGVCGQIIPWNFPLLMQAWK.L	Carbamidomethyl: 7	CID	173 - 195	ALDH2_HUMAN	Aldehyde dehydrogenase, mitochondrial OS=Homo sapiens GN=ALDH2 PE=1 SV=2
47		true	19981	912.7988	912.7978	2735.3716	3	1.04	5.85	101.43	46.7 (M:46.7)	3		1	0	R.HEPVGVCGQIIPWNFPLLMQAWK.L	Carbamidomethyl: 7; Oxidation: 19	CID	173 - 195	ALDH2_HUMAN	Aldehyde dehydrogenase, mitochondrial OS=Homo sapiens GN=ALDH2 PE=1 SV=2
48		true	10408	685.3975	685.3972	1368.7799	2	0.39	1.65	58.10	96.7 (M:96.7)	4		1	0	K.LGPALATGNVVVMK.V		CID	196 - 209	ALDH2_HUMAN	Aldehyde dehydrogenase, mitochondrial OS=Homo sapiens GN=ALDH2 PE=1 SV=2
49		true	8047	693.3937	693.3947	1384.7748	2	-1.42	5.29	49.55	152.5 (M:152.5)	4		1	0	K.LGPALATGNVVVMK.V	Oxidation: 13	CID	196 - 209	ALDH2_HUMAN	Aldehyde dehydrogenase, mitochondrial OS=Homo sapiens GN=ALDH2 PE=1 SV=2
50		true	18196	615.3560	615.3558	1843.0455	3	0.28	2.21	91.12	145.3 (M:145.3)	5		1	0	K.VAEQTPLTALYVANLIK.E		CID	210 - 226	ALDH2_HUMAN	Aldehyde dehydrogenase, mitochondrial OS=Homo sapiens GN=ALDH2 PE=1 SV=2
51		true	16421	1007.1771	1007.1768	3018.5087	3	0.29	4.36	82.05	141.7 (M:141.7)	13		1	0	K.EAGFPPGVVNIVPGFGPTAGAAIASHEDVDK.V		CID	227 - 257	ALDH2_HUMAN	Aldehyde dehydrogenase, mitochondrial OS=Homo sapiens GN=ALDH2 PE=1 SV=2
52		true	17220	1035.2786	1035.2775	4137.0807	4	1.08	4.17	86.05	147.6 (M:147.6)	11		1	1	K.EAGFPPGVVNIVPGFGPTAGAAIASHEDVDKVAFTGSTEIGR.V		CID	227 - 268	ALDH2_HUMAN	Aldehyde dehydrogenase, mitochondrial OS=Homo sapiens GN=ALDH2 PE=1 SV=2
53		true	5685	569.2977	569.2986	1136.5826	2	-1.62	2.24	40.79	118.4 (M:118.4)	7		1	0	K.VAFTGSTEIGR.V		CID	258 - 268	ALDH2_HUMAN	Aldehyde dehydrogenase, mitochondrial OS=Homo sapiens GN=ALDH2 PE=1 SV=2
54		true	4222	593.8425	593.8431	1185.6717	2	-1.17	2.02	35.23	72.1 (M:72.1)	2		1	0	R.VIQVAAGSSNLK.R		CID	269 - 280	ALDH2_HUMAN	Aldehyde dehydrogenase, mitochondrial OS=Homo sapiens GN=ALDH2 PE=1 SV=2
55		true	3175	671.8927	671.8937	1341.7728	2	-1.52	2.90	31.12	108.7 (M:108.7)	8		1	1	R.VIQVAAGSSNLKR.V		CID	269 - 281	ALDH2_HUMAN	Aldehyde dehydrogenase, mitochondrial OS=Homo sapiens GN=ALDH2 PE=1 SV=2
56		true	5538	692.8979	692.8990	1383.7834	2	-1.59	3.33	40.22	64.6 (M:64.6)	6		1	1	R.VIQVAAGSSNLKR.V	Acetyl: 12	CID	269 - 281	ALDH2_HUMAN	Aldehyde dehydrogenase, mitochondrial OS=Homo sapiens GN=ALDH2 PE=1 SV=2
57		true	5606	694.4069	694.4084	1386.8022	2	-2.17	6.79	40.44	83.1 (M:83.1)	8		1	1	R.VIQVAAGSSNLKR.V	Acetyl:2H(3): 12	CID	269 - 281	ALDH2_HUMAN	Aldehyde dehydrogenase, mitochondrial OS=Homo sapiens GN=ALDH2 PE=1 SV=2
59		true	15413	895.4173	895.4176	1788.8206	2	-0.37	2.34	77.65	141.2 (M:141.2)	18		1	0	R.TFVQEDIYDEFVER.S		CID	325 - 338	ALDH2_HUMAN	Aldehyde dehydrogenase, mitochondrial OS=Homo sapiens GN=ALDH2 PE=1 SV=2
60		true	10304	912.4480	912.4472	2734.3198	3	0.84	6.10	57.69	29.2 (M:29.2)	1		1	2	K.SRVVGNPFDSKTEQGPQVDETQFK.K	Acetyl: 11	CID	345 - 368	ALDH2_HUMAN	Aldehyde dehydrogenase, mitochondrial OS=Homo sapiens GN=ALDH2 PE=1 SV=2
61		true	10268	913.4536	913.4535	2737.3387	3	0.06	7.14	57.57	69.1 (M:69.1)	2		1	2	K.SRVVGNPFDSKTEQGPQVDETQFK.K	Acetyl:2H(3): 11	CID	345 - 368	ALDH2_HUMAN	Aldehyde dehydrogenase, mitochondrial OS=Homo sapiens GN=ALDH2 PE=1 SV=2
63		true	8907	717.3653	717.3657	2865.4336	4	-0.59	7.60	52.62	59.6 (M:59.6)	2	50.00	1	3	K.SRVVGNPFDSKTEQGPQVDETQFKK.I	Acetyl:2H(3): 24	CID	345 - 369	ALDH2_HUMAN	Aldehyde dehydrogenase, mitochondrial OS=Homo sapiens GN=ALDH2 PE=1 SV=2
64		true	10525	727.1133	727.1136	2904.4254	4	-0.46	7.31	58.52	20.2 (M:20.2)	2	50.00	1	3	K.SRVVGNPFDSKTEQGPQVDETQFKK.I	Acetyl: 11, 24	CID	345 - 369	ALDH2_HUMAN	Aldehyde dehydrogenase, mitochondrial OS=Homo sapiens GN=ALDH2 PE=1 SV=2
65		true	10488	728.6228	728.6230	2910.4630	4	-0.31	9.33	58.37	29.2 (M:29.2)	1	50.00	1	3	K.SRVVGNPFDSKTEQGPQVDETQFKK.I	Acetyl:2H(3): 11, 24	CID	345 - 369	ALDH2_HUMAN	Aldehyde dehydrogenase, mitochondrial OS=Homo sapiens GN=ALDH2 PE=1 SV=2
66		true	5474	481.7498	481.7507	961.4869	2	-1.92	2.45	40.01	63.4 (M:63.4)	9		1	0	R.VVGNPFDSK.T		CID	347 - 355	ALDH2_HUMAN	Aldehyde dehydrogenase, mitochondrial OS=Homo sapiens GN=ALDH2 PE=1 SV=2
67		true	7321	502.7551	502.7560	1003.4975	2	-1.88	11.55	46.87	40.7 (M:40.7)	2		1	0	R.VVGNPFDSK.T	Acetyl: 9	CID	347 - 355	ALDH2_HUMAN	Aldehyde dehydrogenase, mitochondrial OS=Homo sapiens GN=ALDH2 PE=1 SV=2
68		true	9500	817.3994	817.3993	2449.1761	3	0.04	6.23	54.81	152.5 (M:152.5)	8		1	1	R.VVGNPFDSKTEQGPQVDETQFK.K		CID	347 - 368	ALDH2_HUMAN	Aldehyde dehydrogenase, mitochondrial OS=Homo sapiens GN=ALDH2 PE=1 SV=2
69		true	11172	832.4135	832.4091	2494.2055	3	5.21	4.73	60.79	29.7 (M:29.7)	2		1	1	R.VVGNPFDSKTEQGPQVDETQFK.K	Acetyl:2H(3): 9	CID	347 - 368	ALDH2_HUMAN	Aldehyde dehydrogenase, mitochondrial OS=Homo sapiens GN=ALDH2 PE=1 SV=2
70		true	11250	1246.6006	1246.6006	2491.1867	2	0.00	7.56	61.01	152.5 (M:152.5)	16	100.00	1	1	R.VVGNPFDSKTEQGPQVDETQFK.K	Acetyl: 9	CID	347 - 368	ALDH2_HUMAN	Aldehyde dehydrogenase, mitochondrial OS=Homo sapiens GN=ALDH2 PE=1 SV=2
71		true	8133	645.3250	645.3251	2577.2711	4	-0.14	5.83	49.86	152.5 (M:152.5)	6		1	2	R.VVGNPFDSKTEQGPQVDETQFKK.I		CID	347 - 369	ALDH2_HUMAN	Aldehyde dehydrogenase, mitochondrial OS=Homo sapiens GN=ALDH2 PE=1 SV=2
72		true	9770	656.5820	656.5824	2622.3005	4	-0.64	6.36	55.71	82.3 (M:82.3)	9	99.92	1	2	R.VVGNPFDSKTEQGPQVDETQFKK.I	Acetyl:2H(3): 9	CID	347 - 369	ALDH2_HUMAN	Aldehyde dehydrogenase, mitochondrial OS=Homo sapiens GN=ALDH2 PE=1 SV=2
73		true	11512	666.3304	666.3303	2661.2922	4	0.06	3.69	61.94	148.8 (M:148.8)	13	50.00	1	2	R.VVGNPFDSKTEQGPQVDETQFKK.I	Acetyl: 9, 23	CID	347 - 369	ALDH2_HUMAN	Aldehyde dehydrogenase, mitochondrial OS=Homo sapiens GN=ALDH2 PE=1 SV=2
75		true	9819	874.1008	874.1012	2619.2817	3	-0.45	3.71	55.86	68.5 (M:68.5)	4	100.00	1	2	R.VVGNPFDSKTEQGPQVDETQFKK.I	Acetyl: 9	CID	347 - 369	ALDH2_HUMAN	Aldehyde dehydrogenase, mitochondrial OS=Homo sapiens GN=ALDH2 PE=1 SV=2
76		true	9829	875.1072	875.1074	2622.3005	3	-0.26	3.67	55.88	136.8 (M:136.8)	9	50.00	1	2	R.VVGNPFDSKTEQGPQVDETQFKK.I	Acetyl:2H(3): 23	CID	347 - 369	ALDH2_HUMAN	Aldehyde dehydrogenase, mitochondrial OS=Homo sapiens GN=ALDH2 PE=1 SV=2
77		true	11511	890.1168	890.1172	2667.3299	3	-0.52	3.16	61.90	151.9 (M:151.9)	9	50.00	1	2	R.VVGNPFDSKTEQGPQVDETQFKK.I	Acetyl:2H(3): 9, 23	CID	347 - 369	ALDH2_HUMAN	Aldehyde dehydrogenase, mitochondrial OS=Homo sapiens GN=ALDH2 PE=1 SV=2
79		true	18713	907.7258	907.7258	3626.8739	4	0.09	10.59	93.97	14.5 (M:14.5)	1		1	3	R.VVGNPFDSKTEQGPQVDETQFKKILGYINTGK.Q	Acetyl:2H(3): 22, 23	CID	347 - 378	ALDH2_HUMAN	Aldehyde dehydrogenase, mitochondrial OS=Homo sapiens GN=ALDH2 PE=1 SV=2
80		true	19561	916.7189	916.7190	3662.8468	4	-0.09	7.33	98.93	58.6 (M:58.6)	2	99.99	1	3	R.VVGNPFDSKTEQGPQVDETQFKKILGYINTGK.Q	Acetyl: 9, 22, 23	CID	347 - 378	ALDH2_HUMAN	Aldehyde dehydrogenase, mitochondrial OS=Homo sapiens GN=ALDH2 PE=1 SV=2
81		true	19553	1224.9770	1224.9750	3671.9033	3	1.59	4.13	98.88	22.7 (M:22.7)	3		1	3	R.VVGNPFDSKTEQGPQVDETQFKKILGYINTGK.Q	Acetyl:2H(3): 9, 22, 23	CID	347 - 378	ALDH2_HUMAN	Aldehyde dehydrogenase, mitochondrial OS=Homo sapiens GN=ALDH2 PE=1 SV=2
82		true	4530	753.8569	753.8572	1505.6998	2	-0.38	4.21	36.32	128.4 (M:128.4)	12		1	0	K.TEQGPQVDETQFK.K		CID	356 - 368	ALDH2_HUMAN	Aldehyde dehydrogenase, mitochondrial OS=Homo sapiens GN=ALDH2 PE=1 SV=2
83		true	3346	545.6053	545.6055	1633.7948	3	-0.35	2.97	31.80	118.3 (M:118.3)	5		1	1	K.TEQGPQVDETQFKK.I		CID	356 - 369	ALDH2_HUMAN	Aldehyde dehydrogenase, mitochondrial OS=Homo sapiens GN=ALDH2 PE=1 SV=2
84		true	5509	838.9092	838.9099	1675.8053	2	-0.84	3.35	40.12	119.3 (M:119.3)	6	50.00	1	1	K.TEQGPQVDETQFKK.I	Acetyl: 13	CID	356 - 369	ALDH2_HUMAN	Aldehyde dehydrogenase, mitochondrial OS=Homo sapiens GN=ALDH2 PE=1 SV=2
85		true	5507	840.4179	840.4194	1678.8242	2	-1.73	3.83	40.11	108.1 (M:108.1)	5	50.00	1	1	K.TEQGPQVDETQFKK.I	Acetyl:2H(3): 13	CID	356 - 369	ALDH2_HUMAN	Aldehyde dehydrogenase, mitochondrial OS=Homo sapiens GN=ALDH2 PE=1 SV=2
86		true	18503	893.4613	893.4606	2677.3599	3	0.84	3.99	92.75	102.2 (M:102.2)	6	100.00	1	2	K.TEQGPQVDETQFKKILGYINTGK.Q	Acetyl: 13, 14	CID	356 - 378	ALDH2_HUMAN	Aldehyde dehydrogenase, mitochondrial OS=Homo sapiens GN=ALDH2 PE=1 SV=2
88		true	18485	895.4734	895.4731	2683.3976	3	0.32	4.78	92.65	91.9 (M:91.9)	6	100.00	1	2	K.TEQGPQVDETQFKKILGYINTGK.Q	Acetyl:2H(3): 13, 14	CID	356 - 378	ALDH2_HUMAN	Aldehyde dehydrogenase, mitochondrial OS=Homo sapiens GN=ALDH2 PE=1 SV=2
89		true	17146	800.1713	800.1703	3196.6523	4	1.17	5.56	85.65	98.5 (M:98.5)	3	100.00	1	3	K.TEQGPQVDETQFKKILGYINTGKQEGAK.L	Acetyl:2H(3): 13, 14	CID	356 - 383	ALDH2_HUMAN	Aldehyde dehydrogenase, mitochondrial OS=Homo sapiens GN=ALDH2 PE=1 SV=2
90		true	17175	1064.5448	1064.5455	3190.6146	3	-0.62	9.16	85.80	28.6 (M:28.6)	2		1	3	K.TEQGPQVDETQFKKILGYINTGKQEGAK.L	Acetyl: 13, 14	CID	356 - 383	ALDH2_HUMAN	Aldehyde dehydrogenase, mitochondrial OS=Homo sapiens GN=ALDH2 PE=1 SV=2
92		true	18218	1078.5491	1078.5490	3232.6252	3	0.07	4.44	91.22	70.3 (M:70.3)	10	98.85	1	3	K.TEQGPQVDETQFKKILGYINTGKQEGAK.L	Acetyl: 13, 14, 23	CID	356 - 383	ALDH2_HUMAN	Aldehyde dehydrogenase, mitochondrial OS=Homo sapiens GN=ALDH2 PE=1 SV=2
93		true	18219	1081.5674	1081.5678	3241.6817	3	-0.40	7.11	91.22	51.0 (M:51.0)	8	96.89	1	3	K.TEQGPQVDETQFKKILGYINTGKQEGAK.L	Acetyl:2H(3): 13, 14, 23	CID	356 - 383	ALDH2_HUMAN	Aldehyde dehydrogenase, mitochondrial OS=Homo sapiens GN=ALDH2 PE=1 SV=2
94		true	5707	553.8308	553.8320	1105.6495	2	-2.33	6.69	40.86	21.7 (M:21.7)	1		1	1	K.KILGYINTGK.Q		CID	369 - 378	ALDH2_HUMAN	Aldehyde dehydrogenase, mitochondrial OS=Homo sapiens GN=ALDH2 PE=1 SV=2
95		true	8861	574.8373	574.8373	1147.6601	2	-0.12	1.67	52.46	39.9 (M:39.9)	4		1	1	K.KILGYINTGK.Q	Acetyl: 1	CID	369 - 378	ALDH2_HUMAN	Aldehyde dehydrogenase, mitochondrial OS=Homo sapiens GN=ALDH2 PE=1 SV=2
96		true	8915	576.3463	576.3467	1150.6789	2	-0.77	3.36	52.67	41.1 (M:41.1)	5		1	1	K.KILGYINTGK.Q	Acetyl:2H(3): 1	CID	369 - 378	ALDH2_HUMAN	Aldehyde dehydrogenase, mitochondrial OS=Homo sapiens GN=ALDH2 PE=1 SV=2
97		true	4395	540.6411	540.6420	1618.9043	3	-1.66	4.33	35.86	17.0 (M:17.0)	1		1	2	K.KILGYINTGKQEGAK.L		CID	369 - 383	ALDH2_HUMAN	Aldehyde dehydrogenase, mitochondrial OS=Homo sapiens GN=ALDH2 PE=1 SV=2
98		true	6904	554.6453	554.6456	1660.9148	3	-0.47	4.05	45.41	38.3 (M:38.3)	2	99.74	1	2	K.KILGYINTGKQEGAK.L	Acetyl: 10	CID	369 - 383	ALDH2_HUMAN	Aldehyde dehydrogenase, mitochondrial OS=Homo sapiens GN=ALDH2 PE=1 SV=2
99		true	6886	555.6514	555.6518	1663.9337	3	-0.82	3.00	45.35	36.0 (M:36.0)	2	98.52	1	2	K.KILGYINTGKQEGAK.L	Acetyl:2H(3): 10	CID	369 - 383	ALDH2_HUMAN	Aldehyde dehydrogenase, mitochondrial OS=Homo sapiens GN=ALDH2 PE=1 SV=2
100		true	9594	570.6614	570.6616	1708.9630	3	-0.32	3.09	55.13	55.7 (M:55.7)	6	99.87	1	2	K.KILGYINTGKQEGAK.L	Acetyl:2H(3): 1, 10	CID	369 - 383	ALDH2_HUMAN	Aldehyde dehydrogenase, mitochondrial OS=Homo sapiens GN=ALDH2 PE=1 SV=2
101		true	9627	852.4691	852.4700	1702.9254	2	-1.03	2.49	55.24	87.9 (M:87.9)	6	99.74	1	2	K.KILGYINTGKQEGAK.L	Acetyl: 1, 10	CID	369 - 383	ALDH2_HUMAN	Aldehyde dehydrogenase, mitochondrial OS=Homo sapiens GN=ALDH2 PE=1 SV=2
102		true	15138	929.8324	929.8322	2786.4749	3	0.21	9.00	76.60	49.5 (M:49.5)	1	98.84	1	3	K.KILGYINTGKQEGAKLLCGGGIAADR.G	Carbamidomethyl: 18; Acetyl: 10, 15	CID	369 - 394	ALDH2_HUMAN	Aldehyde dehydrogenase, mitochondrial OS=Homo sapiens GN=ALDH2 PE=1 SV=2
103		true	15174	931.8446	931.8448	2792.5126	3	-0.25	7.70	76.71	52.2 (M:52.2)	4	99.00	1	3	K.KILGYINTGKQEGAKLLCGGGIAADR.G	Carbamidomethyl: 18; Acetyl:2H(3): 10, 15	CID	369 - 394	ALDH2_HUMAN	Aldehyde dehydrogenase, mitochondrial OS=Homo sapiens GN=ALDH2 PE=1 SV=2
105		true	16942	943.8353	943.8358	2828.4855	3	-0.53	3.84	84.62	146.6 (M:146.6)	8		1	3	K.KILGYINTGKQEGAKLLCGGGIAADR.G	Carbamidomethyl: 18; Acetyl: 1, 10, 15	CID	369 - 394	ALDH2_HUMAN	Aldehyde dehydrogenase, mitochondrial OS=Homo sapiens GN=ALDH2 PE=1 SV=2
106		true	16908	946.8546	946.8546	2837.5420	3	0.04	7.34	84.47	72.4 (M:72.4)	5		1	3	K.KILGYINTGKQEGAKLLCGGGIAADR.G	Carbamidomethyl: 18; Acetyl:2H(3): 1, 10, 15	CID	369 - 394	ALDH2_HUMAN	Aldehyde dehydrogenase, mitochondrial OS=Homo sapiens GN=ALDH2 PE=1 SV=2
107		true	6562	489.7838	489.7846	977.5546	2	-1.67	2.26	44.14	48.6 (M:48.6)	2		1	0	K.ILGYINTGK.Q		CID	370 - 378	ALDH2_HUMAN	Aldehyde dehydrogenase, mitochondrial OS=Homo sapiens GN=ALDH2 PE=1 SV=2
108		true	5070	497.9434	497.9437	1490.8093	3	-0.68	16.59	38.25	145.6 (M:145.6)	3		1	1	K.ILGYINTGKQEGAK.L		CID	370 - 383	ALDH2_HUMAN	Aldehyde dehydrogenase, mitochondrial OS=Homo sapiens GN=ALDH2 PE=1 SV=2
109		true	7598	767.4158	767.4172	1532.8199	2	-1.79	4.02	47.82	55.2 (M:55.2)	8	98.46	1	1	K.ILGYINTGKQEGAK.L	Acetyl: 9	CID	370 - 383	ALDH2_HUMAN	Aldehyde dehydrogenase, mitochondrial OS=Homo sapiens GN=ALDH2 PE=1 SV=2
110		true	7679	768.9257	768.9266	1535.8387	2	-1.14	2.28	48.14	76.0 (M:76.0)	8	99.98	1	1	K.ILGYINTGKQEGAK.L	Acetyl:2H(3): 9	CID	370 - 383	ALDH2_HUMAN	Aldehyde dehydrogenase, mitochondrial OS=Homo sapiens GN=ALDH2 PE=1 SV=2
111		true	13464	873.1286	873.1304	2616.3694	3	-2.02	11.71	69.70	23.4 (M:23.4)	2	67.34	1	2	K.ILGYINTGKQEGAKLLCGGGIAADR.G	Carbamidomethyl: 17; Acetyl: 9	CID	370 - 394	ALDH2_HUMAN	Aldehyde dehydrogenase, mitochondrial OS=Homo sapiens GN=ALDH2 PE=1 SV=2
112		true	13471	873.1304	873.1304	2616.3694	3	0.01	7.09	69.75	25.0 (M:25.0)	2	92.10	1	2	K.ILGYINTGKQEGAKLLCGGGIAADR.G	Carbamidomethyl: 17; Acetyl: 14	CID	370 - 394	ALDH2_HUMAN	Aldehyde dehydrogenase, mitochondrial OS=Homo sapiens GN=ALDH2 PE=1 SV=2
113		true	15778	889.1465	889.1465	2664.4176	3	-0.03	4.56	79.32	109.2 (M:109.2)	9		1	2	K.ILGYINTGKQEGAKLLCGGGIAADR.G	Carbamidomethyl: 17; Acetyl:2H(3): 9, 14	CID	370 - 394	ALDH2_HUMAN	Aldehyde dehydrogenase, mitochondrial OS=Homo sapiens GN=ALDH2 PE=1 SV=2
114		true	15808	1330.1968	1330.1972	2658.3799	2	-0.32	5.48	79.46	152.5 (M:152.5)	8		1	2	K.ILGYINTGKQEGAKLLCGGGIAADR.G	Carbamidomethyl: 17; Acetyl: 9, 14	CID	370 - 394	ALDH2_HUMAN	Aldehyde dehydrogenase, mitochondrial OS=Homo sapiens GN=ALDH2 PE=1 SV=2
115		true	8779	554.2882	554.2887	1659.8442	3	-0.94	3.56	52.19	42.8 (M:42.8)	3		1	1	K.QEGAKLLCGGGIAADR.G	Carbamidomethyl: 8; Acetyl:2H(3): 5	CID	379 - 394	ALDH2_HUMAN	Aldehyde dehydrogenase, mitochondrial OS=Homo sapiens GN=ALDH2 PE=1 SV=2
116		true	8778	829.4204	829.4200	1656.8254	2	0.54	2.97	52.19	111.9 (M:111.9)	6		1	1	K.QEGAKLLCGGGIAADR.G	Carbamidomethyl: 8; Acetyl: 5	CID	379 - 394	ALDH2_HUMAN	Aldehyde dehydrogenase, mitochondrial OS=Homo sapiens GN=ALDH2 PE=1 SV=2
117		true	4497	551.7864	551.7873	1101.5601	2	-1.62	2.10	36.21	87.1 (M:87.1)	6		1	0	K.LLCGGGIAADR.G	Carbamidomethyl: 3	CID	384 - 394	ALDH2_HUMAN	Aldehyde dehydrogenase, mitochondrial OS=Homo sapiens GN=ALDH2 PE=1 SV=2
118		true	16752	1094.0416	1094.0432	2186.0718	2	-1.48	5.08	83.75	91.3 (M:91.3)	8		1	0	R.GYFIQPTVFGDVQDGMTIAK.E		CID	395 - 414	ALDH2_HUMAN	Aldehyde dehydrogenase, mitochondrial OS=Homo sapiens GN=ALDH2 PE=1 SV=2
119		true	14999	1102.0409	1102.0406	2202.0667	2	0.25	6.92	75.98	99.8 (M:99.8)	6		1	0	R.GYFIQPTVFGDVQDGMTIAK.E	Oxidation: 16	CID	395 - 414	ALDH2_HUMAN	Aldehyde dehydrogenase, mitochondrial OS=Homo sapiens GN=ALDH2 PE=1 SV=2
120		true	18103	702.3839	702.3838	1402.7530	2	0.10	3.19	90.61	18.5 (M:18.5)	4		1	0	K.EEIFGPVMQILK.F		CID	415 - 426	ALDH2_HUMAN	Aldehyde dehydrogenase, mitochondrial OS=Homo sapiens GN=ALDH2 PE=1 SV=2
121		true	15574	710.3797	710.3812	1418.7479	2	-2.23	5.30	78.27	27.1 (M:27.1)	1		1	0	K.EEIFGPVMQILK.F	Oxidation: 8	CID	415 - 426	ALDH2_HUMAN	Aldehyde dehydrogenase, mitochondrial OS=Homo sapiens GN=ALDH2 PE=1 SV=2
122		true	20491	860.9707	860.9708	1719.9270	2	-0.06	5.86	104.46	44.7 (M:44.7)	2	50.00	1	1	K.EEIFGPVMQILKFK.T	Acetyl: 14	CID	415 - 428	ALDH2_HUMAN	Aldehyde dehydrogenase, mitochondrial OS=Homo sapiens GN=ALDH2 PE=1 SV=2
123		true	8119	393.2237	393.2240	1176.6503	3	-0.80	2.40	49.81	71.6 (M:71.6)	5		1	1	K.FKTIEEVVGR.A		CID	427 - 436	ALDH2_HUMAN	Aldehyde dehydrogenase, mitochondrial OS=Homo sapiens GN=ALDH2 PE=1 SV=2
124		true	11364	610.3366	610.3377	1218.6608	2	-1.73	2.70	61.42	30.7 (M:30.7)	2		1	1	K.FKTIEEVVGR.A	Acetyl: 2	CID	427 - 436	ALDH2_HUMAN	Aldehyde dehydrogenase, mitochondrial OS=Homo sapiens GN=ALDH2 PE=1 SV=2
125		true	11349	611.8457	611.8471	1221.6797	2	-2.39	2.74	61.36	63.5 (M:63.5)	4		1	1	K.FKTIEEVVGR.A	Acetyl:2H(3): 2	CID	427 - 436	ALDH2_HUMAN	Aldehyde dehydrogenase, mitochondrial OS=Homo sapiens GN=ALDH2 PE=1 SV=2
127		true	12678	764.3929	764.3937	1526.7729	2	-1.10	3.84	66.62	152.5 (M:152.5)	15		1	0	R.ANNSTYGLAAAVFTK.D		CID	437 - 451	ALDH2_HUMAN	Aldehyde dehydrogenase, mitochondrial OS=Homo sapiens GN=ALDH2 PE=1 SV=2
128		true	16478	681.0124	681.0127	2040.0164	3	-0.51	5.48	82.31	44.3 (M:44.3)	3	96.29	1	1	R.ANNSTYGLAAAVFTKDLDK.A	Acetyl: 15	CID	437 - 455	ALDH2_HUMAN	Aldehyde dehydrogenase, mitochondrial OS=Homo sapiens GN=ALDH2 PE=1 SV=2
129		true	11242	800.3982	800.3987	1598.7828	2	-0.60	3.78	61.00	107.7 (M:107.7)	5		1	0	R.ELGEYGLQAYTEVK.T		CID	493 - 506	ALDH2_HUMAN	Aldehyde dehydrogenase, mitochondrial OS=Homo sapiens GN=ALDH2 PE=1 SV=2
130		true	15407	724.0469	724.0474	2169.1205	3	-0.79	5.62	77.60	45.2 (M:45.2)	2	99.46	1	1	R.ELGEYGLQAYTEVKTVTVK.V	Acetyl: 14	CID	493 - 511	ALDH2_HUMAN	Aldehyde dehydrogenase, mitochondrial OS=Homo sapiens GN=ALDH2 PE=1 SV=2
131		true	16154	888.8087	888.8092	2663.4058	3	-0.57	6.34	80.91	14.0 (M:14.0)	2		1	2	R.ELGEYGLQAYTEVKTVTVKVPQK.N	Acetyl: 14, 19	CID	493 - 515	ALDH2_HUMAN	Aldehyde dehydrogenase, mitochondrial OS=Homo sapiens GN=ALDH2 PE=1 SV=2
132		true	12812	696.1222	696.1222	2780.4596	4	-0.02	8.61	67.15	33.8 (M:33.8)	1		1	3	R.ELGEYGLQAYTEVKTVTVKVPQKNS.-		CID	493 - 517	ALDH2_HUMAN	Aldehyde dehydrogenase, mitochondrial OS=Homo sapiens GN=ALDH2 PE=1 SV=2
133		true	2252	500.3127	500.3135	998.6124	2	-1.50	8.18	27.39	32.3 (M:32.3)	4		1	1	K.TVTVKVPQK.N		CID	507 - 515	ALDH2_HUMAN	Aldehyde dehydrogenase, mitochondrial OS=Homo sapiens GN=ALDH2 PE=1 SV=2
134		true	3650	521.3183	521.3188	1040.6230	2	-0.83	4.96	32.99	21.1 (M:21.1)	3		1	1	K.TVTVKVPQK.N	Acetyl: 5	CID	507 - 515	ALDH2_HUMAN	Aldehyde dehydrogenase, mitochondrial OS=Homo sapiens GN=ALDH2 PE=1 SV=2
135		true	3675	522.8274	522.8282	1043.6418	2	-1.51	1.17	33.09	22.9 (M:22.9)	2		1	1	K.TVTVKVPQK.N	Acetyl:2H(3): 5	CID	507 - 515	ALDH2_HUMAN	Aldehyde dehydrogenase, mitochondrial OS=Homo sapiens GN=ALDH2 PE=1 SV=2
